# Supplementary material for: Mechanistic insights on platinum- and palladium-pincer catalyzed coupling and cyclopropanation reactions between olefins
Source: Royal Society of Chemistry journal article supplement (doi:10.1039/c2dt12325h), 2012-01-01
Supplement: c2dt12325h.pdf [file c2dt12325h.pdf]

*Electronic Supplementary Information*

*for*

**Mechanistic Insights on Platinum- and Palladium-Pincer  
Catalyzed Coupling and Cyclopropanation Reactions between  
Olefins**

Ramanan Rajeev and Raghavan B. Sunoj\*

Department of Chemistry, Indian Institute of Technology Bombay

Powai, Mumbai 400076

## Table of Contents

| List of Tables  |                                                                                                                                                                                                                                   |     |
|-----------------|-----------------------------------------------------------------------------------------------------------------------------------------------------------------------------------------------------------------------------------|-----|
| Table S1        | The relative free energies (in kcal mol <sup>-1</sup> ) of the transition states and intermediates calculated at the B3LYP/LANL2DZ (Pt),6-31+G** level of theory for the platinum pincer catalyzed coupling of ethene and butene  | S4  |
| Table S2        | Comparison of experimentally reported Pt-CNC and Pt-PCP compounds with optimized structural parameters of pincers under study                                                                                                     | S4  |
| Table S3        | The relative free energies (in kcal mol <sup>-1</sup> ) of the transition states and intermediates calculated at the B3LYP/LANL2DZ (Pd),6-31+G** level of theory for the palladium pincer catalyzed coupling of ethene and butene | S7  |
| Table S4        | Differences in relative energies (in kcal mol <sup>-1</sup> ) of transition states leads to dimer and cyclopropane                                                                                                                | S8  |
| Table S5        | Details of the attempts and outcome of geometry optimization of intermediate 'g'                                                                                                                                                  | S9  |
| Table S6        | Thermodynamic parameters (in kcal mol <sup>-1</sup> ) of intermediates <b>d</b> and <b>g</b> at the MP2/LANL2DZ, 6-31G* level of theory                                                                                           | S10 |
| Table S7        | Natural charges on platinum and palladium atom in intermediates and <b>TS(d-g)</b>                                                                                                                                                | S10 |
| List of Figures |                                                                                                                                                                                                                                   |     |
| Fig. S1         | Optimized geometries of intermediate and products at the mPW1K /LANL2DZ (Pt),6-31+G** level of theory                                                                                                                             | S5  |
| Fig. S2         | Enthalpy profile for platinum PNP-pincer catalyzed reaction between ethene and 2-methylbut-2-ene (Series 1) generated at the mPW1K/LANL2DZ (Pt),6-31+G** level of theory.                                                         | S6  |
| Fig. S3         | Free energy profile for real system for Series 1 generated at the mPW1K/LANL2DZ (Pt),6-31G* level of theory.                                                                                                                      | S6  |
| Fig. S4         | The optimized geometries of the key transition states obtained at                                                                                                                                                                 | S12 |

|                                                                                                                           |                                                                                                                                                           |     |
|---------------------------------------------------------------------------------------------------------------------------|-----------------------------------------------------------------------------------------------------------------------------------------------------------|-----|
|                                                                                                                           | the mPW1K/LANL2DZ(Pd),6-31+G** level of theory for the palladium-PNP pincer catalyzed coupling between <i>trans</i> - butene and <i>tert</i> -butylbutene |     |
| Other Information                                                                                                         |                                                                                                                                                           |     |
| Total electronic energy (in a.u) and Cartesian coordinates of geometries optimized at the mPW1K/6-31+G** level of theory. |                                                                                                                                                           | S13 |

**Table S1.** The relative free energies (in kcal mol<sup>-1</sup>) of the transition states and intermediates calculated at the B3LYP/LANL2DZ (Pt),6-31+G\*\* level of theory for the platinum pincer catalyzed coupling of ethene and butene

|                         | Series 1         | Series 2         | Series 3         | Series 4 |
|-------------------------|------------------|------------------|------------------|----------|
| <b>TS<sub>add</sub></b> | 11.7             | 12.1             | 13.4             | 24.7     |
| <b>c</b>                | 6.5              | 10.2             | 5.7              | 22.7     |
| <b>TS(c-e)</b>          | 24.3             | 27.1             | 25.5             | 47.4     |
| <b>TS(c-d)</b>          | 15.6             | 18.9             | 21.2             | 37.5     |
| <b>d</b>                | 9.1              | 10.8             | 7.6              | 22.1     |
| <b>TS(d-e)</b>          | 17.8             | 25.7             | 19.9             | 40.5     |
| <b>TS(d-g)</b>          | 20.9             | 26.4             | 30.9             | 42.3     |
| <b>e</b>                | 1.9              | 0.5              | 7.0              | 16.0     |
| <b>e'</b>               | -0.8             | 5.6              | 4.2              | 21.8     |
| <b>g</b>                | - <sup>a</sup> - | - <sup>a</sup> - | - <sup>a</sup> - | 39.3     |

<sup>a</sup>- All attempts to optimize of these geometries reverted back to the corresponding intermediate 'd'. See Table S6 in Supporting Information for more details.

**Table S2.** Comparison of experimentally reported Pt-CNC and Pt-PCP compounds with optimized structural parameters of pincers under study

|              | Pt(CNC) <sup>1</sup> | Pt-PCP <sup>2</sup> | B3LYP | mPW1K | M06-2X |
|--------------|----------------------|---------------------|-------|-------|--------|
| Pt-C(ethene) | 2.17                 | 2.30                | 2.26  | 2.21  | 2.22   |
| Pt-C(ethene) | 2.17                 | 2.30                | 2.26  | 2.21  | 2.22   |
| C-C          | 1.37                 | 1.30                | 1.38  | 1.37  | 1.38   |

1) D. Serra, P. Cao, J. Cabrera, R. Padilla, F. Rominger and M. Limbach,

*Organometallics*. 2011, **30**, 1885.

2) J. J. Adams, N. Arulsamy and D. M. Roddick, *Organometallics* 2009, **28**, 1148.

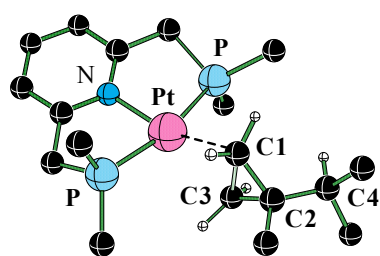

|          |        |
|----------|--------|
| Pt-C1    | 2.39   |
| C1-C3    | 1.49   |
| Pt-C1-C3 | 126.08 |

**1g**

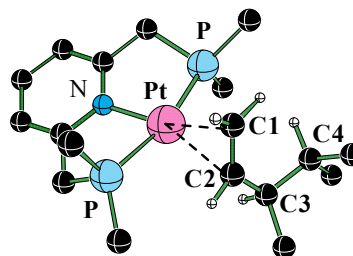

|       |      |
|-------|------|
| Pt-C1 | 2.19 |
| Pt-C2 | 2.31 |
| C1-C2 | 1.38 |

**1e**

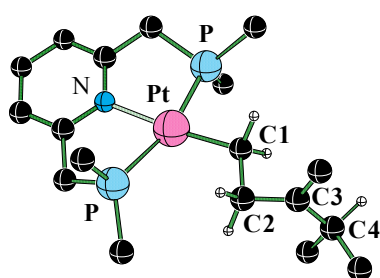

|       |      |
|-------|------|
| Pt-C1 | 2.07 |
| C1-C2 | 1.57 |
| C2-C3 | 1.44 |

**1d**

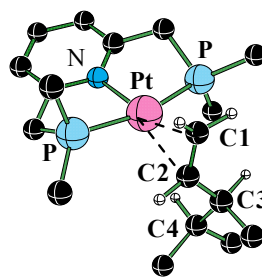

|       |      |
|-------|------|
| Pt-C1 | 2.18 |
| Pt-C2 | 2.30 |
| C1-C2 | 1.38 |

**1e'**

**Fig. S1** Optimized geometries of intermediate and products at the mPW1K /LANL2DZ (Pt),6-31+G\*\* level of theory. (Distances are given in Å and angles in °).

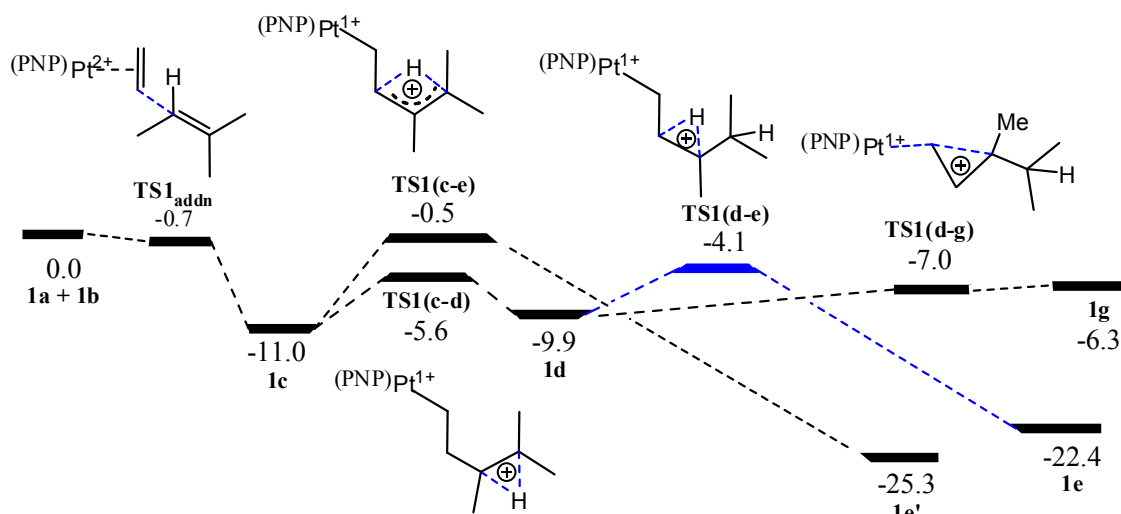

**Fig. S2** Enthalpy profile for platinum PNP-pincer catalyzed reaction between ethene and 2-methylbut-2-ene (Series 1) generated at the mPW1K/LANL2DZ (Pt),6-31+G\*\* level of theory. The relative energies (kcal mol<sup>-1</sup>) are with respect to the  $\pi$ -complex and the free olefin.

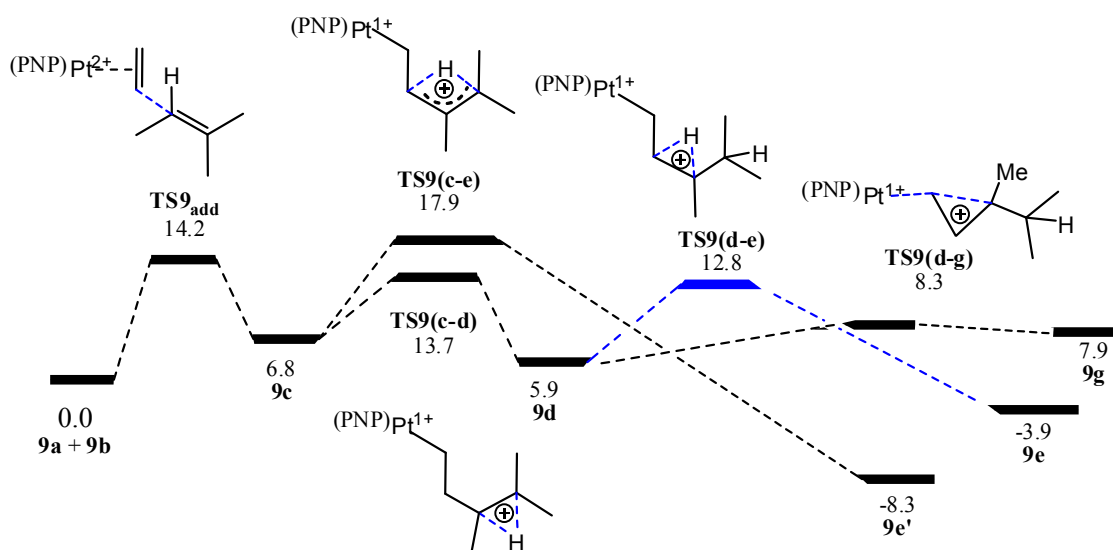

**Fig. S3** Free energy profile for platinum PNP-pincer (real system where the substituents on phosphorous are phenyls) catalyzed reaction between ethene and 2-methylbut-2-ene (Series 1) generated at the mPW1K/LANL2DZ (Pt),6-31G\* level of theory. The relative energies (kcal mol<sup>-1</sup>) are with respect to the  $\pi$ -complex and the free olefin.

**Table S3.** The relative free energies (in kcal mol<sup>-1</sup>) of the transition states and intermediates calculated at the B3LYP/LANL2DZ (Pd),6-31+G\*\* level of theory for the palladium pincer catalyzed coupling of ethene and butene

|                         | Series 5   | Series 6   | Series 7   | Series 8 |
|-------------------------|------------|------------|------------|----------|
| <b>TS<sub>add</sub></b> | 11.5       | 13.0       | 12.6       | 25.0     |
| <b>c</b>                | 8.7        | 11.8       | 7.1        | 24.2     |
| <b>TS(c-e')</b>         | 27.2       | 29.4       | 27.7       | 49.9     |
| <b>TS(c-d)</b>          | 18.8       | 21.3       | 24.0       | 39.5     |
| <b>d</b>                | 10.8       | 13.5       | 8.8        | 24.6     |
| <b>TS(d-e)</b>          | 19.6       | 27.0       | 20.9       | 42.5     |
| <b>TS(d-g)</b>          | <i>-b-</i> | 21.2       | 25.7       | 38.1     |
| <b>e</b>                | 1.1        | -0.3       | 3.6        | 14.7     |
| <b>e'</b>               | -1.9       | 4.0        | 2.6        | 20.1     |
| <b>g</b>                | <i>-a-</i> | <i>-a-</i> | <i>-a-</i> | 37.5     |

<sup>-a,b-</sup> All attempts to optimize of these geometries reverted back to the corresponding intermediate 'd'. See Table S6 in Supporting Information for more details.

**Table S4.** Differences in relative energies (in kcal mol<sup>-1</sup>) of transition states leads to dimer and cyclopropane [ETS(d-e)-E(TS(d-g))]

|        |                  | Series 1/5 |      | Series 2/6 |            | Series 3/7 |            | Series 4/8 |      |
|--------|------------------|------------|------|------------|------------|------------|------------|------------|------|
|        |                  | Pt         | Pd   | Pt         | Pd         | Pt         | Pd         | Pt         | Pd   |
| mPW1K  | E                | 4.5        | 10.3 | 6.1        | 11.9       | -3.2       | 3.0        | 2.3        | 8.2  |
|        | G                | 1.3        | 7.9  | 3.1        | 10.8       | -7.1       | -0.8       | -0.1       | 6.0  |
|        | H                | 2.8        | 8.6  | 4.3        | 10.2       | -5.3       | 1.0        | 1.0        | 6.8  |
|        | E <sub>sol</sub> | 8.5        | 11.7 | 10.7       | 14.3       | 2.9        | 8.3        | 12.2       | 16.9 |
| M06-2X | E                | 7.6        | 11.0 | 9.0        | <i>-b-</i> | 1.4        | <i>-b-</i> | 5.13       | 14.2 |
|        | G                | 6.3        | 7.4  | 7.6        | <i>-b-</i> | -2.0       | <i>-b-</i> | 2.3        | 13.0 |
|        | H                | 6.5        | 9.4  | 7.6        | <i>-b-</i> | -0.7       | <i>-b-</i> | 3.7        | 12.9 |
|        | E <sub>sol</sub> | 10.5       | 15.9 | 11.6       | <i>-b-</i> | 9.2        | <i>-b-</i> | 14.5       | 22.7 |
| B3LYP  | E                | 0.3        | 4.61 | 2.0        | 8.7        | -7.4       | -0.7       | 0.2        | 6.5  |
|        | G                | -3.0       | 0.6  | -0.7       | 5.7        | -10.9      | -4.7       | -1.7       | 4.4  |
|        | H                | -1.4       | 2.6  | 0.2        | 6.9        | -9.5       | -2.8       | -1.0       | 5.08 |
|        | E <sub>sol</sub> | 4.7        | 9.1  | 7.1        | 14.7       | -0.6       | 6.4        | 11.7       | 16.5 |

<sup>-b-</sup> All attempts to optimize of these geometries reverted back to the corresponding intermediate 'd'. See Table S6 in Supporting Information for more details.



## Details about optimization of intermediate 'g'

Attempts to optimize the geometry of 'g' revert backed to 'd' for a few cases. We believe that the nature of potential energy surface where the energy of product 'g' is very near to the transition state **TS(d-g)** causes this reversal. Energies of these missing geometries at the other level of theories studied also convey their thermodynamic instability. Various attempts to optimize missing geometries and the outcome are summarized in Table S6. However, these missing entries will not affect the final conclusions as the corresponding values are obtained with other levels of theory and different series.

**Table S5.** Details of the attempts and outcome of geometry optimization of 'g'

|                                                 |                                                                       |
|-------------------------------------------------|-----------------------------------------------------------------------|
| Increasing the Metal – C1 distance              | M – C1 distance decreased and C1-C2 bond cleaved and converted to 'd' |
| Changing dihedral angles around Metal – C1 bond | Geometries collapsed to 'd'                                           |
| Freezing C1 – C3 distance                       | Optimized geometries were higher order saddle points.                 |

**Table S6.** Relative thermodynamic parameters (in kcal mol<sup>-1</sup>) of intermediates **d** and **g** at the MP2/LANL2DZ,6-31G\* level of theory<sup>i</sup>

| Intermediate | $\Delta G$ | $\Delta H$ |
|--------------|------------|------------|
| <b>1d</b>    | 0.0        | 0.0        |
| <b>1g</b>    | -1.4       | -1.3       |
| <b>5d</b>    | 0.0        | 0.0        |
| <b>5g</b>    | -10.9      | -12.3      |

<sup>i</sup> relative energies are defined with respect to the energies of '**d**'.

**Table S7.** Natural charges on platinum and palladium atom in the intermediates and **TS(d-g)** in Scheme 2

|                          | Pt    | Pd    |
|--------------------------|-------|-------|
| <b>TS1(d-g)/TS5(d-g)</b> | 0.02  | 0.08  |
| <b>TS2(d-g)/TS6(d-g)</b> | 0.04  | 0.09  |
| <b>TS3(d-g)/TS7(d-g)</b> | 0.04  | 0.11  |
| <b>TS4(d-g)/TS8(d-g)</b> | 0.06  | 0.13  |
| <b>1c / 5c</b>           | -0.08 | -0.01 |
| <b>2c / 6c</b>           | -0.08 | -0.01 |
| <b>3c / 7c</b>           | -0.08 | -0.01 |
| <b>4c / 8c</b>           | -0.09 | -0.03 |
| <b>1d / 5d</b>           | -0.05 | 0.03  |
| <b>2d / 6d</b>           | -0.06 | 0.02  |
| <b>3d / 7d</b>           | -0.08 | 0.02  |
| <b>4d / 8d</b>           | -0.08 | -0.01 |

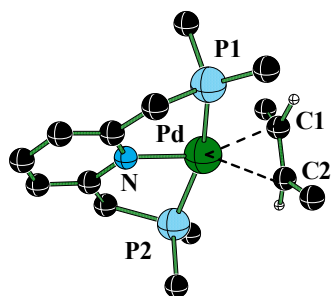

|             |         |         |        |
|-------------|---------|---------|--------|
| Pd-C1       | 2.27,   | 2.34,   | 2.33   |
| Pd-C2       | 2.27,   | 2.34,   | 2.33   |
| Pd-N        | 2.09,   | 2.13,   | 2.13   |
| C1-C2       | 1.37,   | 1.37,   | 1.38   |
| P1-Pd-C1-C2 | -57.95, | -60.92, | -61.65 |

**8a**

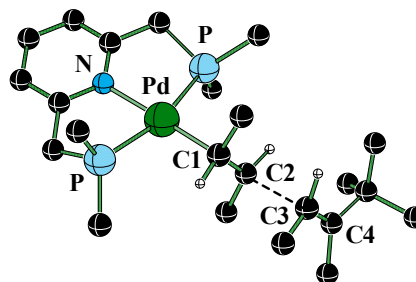

|          |         |        |        |
|----------|---------|--------|--------|
| C2-C3    | 2.20    | 2.18,  | 2.10   |
| Pd-C1    | 2.14    | 2.15,  | 2.18   |
| C1-C2-C3 | 100.02, | 99.34, | 102.54 |
| C2-C3-C4 | 97.74,  | 94.44, | 101.62 |

**TS8<sub>add</sub>**

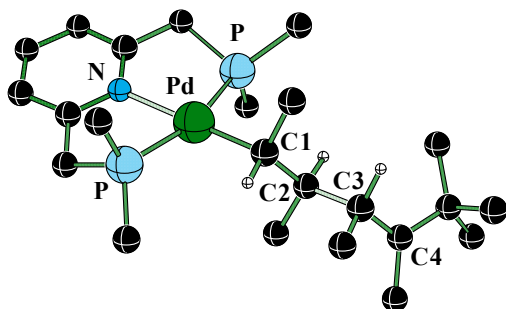

|          |         |         |        |
|----------|---------|---------|--------|
| Pd-C1    | 2.07,   | 2.07,   | 2.13   |
| C1-C2    | 1.52,   | 1.52,   | 1.52   |
| C2-C3    | 1.61,   | 1.65,   | 1.69   |
| C3-C4    | 1.45,   | 1.45,   | 1.45   |
| Pd-C1-C2 | 112.16, | 111.07, | 111.55 |

**8c**

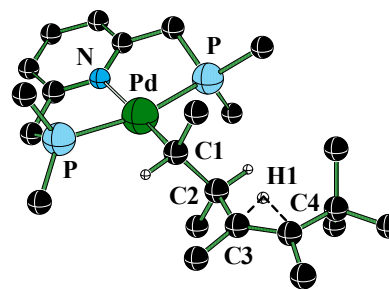

|          |         |         |        |
|----------|---------|---------|--------|
| C3-H1    | 1.34,   | 1.42,   | 1.33   |
| C4-H1    | 1.28,   | 1.24,   | 1.31   |
| C3-H1-C4 | 65.10,  | 64.20,  | 65.30  |
| C2-C3-C4 | 126.38, | 125.82, | 126.33 |

**TS8(c-d)**

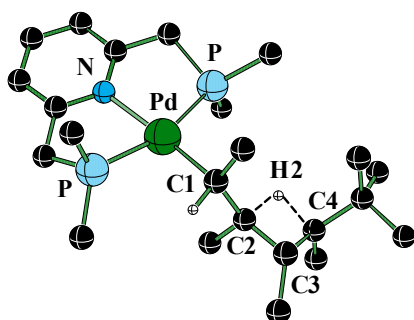

|          |        |        |       |
|----------|--------|--------|-------|
| C2-H2    | 1.34,  | 1.34,  | 1.36  |
| C4-H2    | 1.32,  | 1.32,  | 1.35  |
| C2-H2-C4 | 93.43, | 92.39, | 95.72 |
| C2-C3-C4 | 80.10, | 78.90, | 82.54 |

**TS8(c-e)**

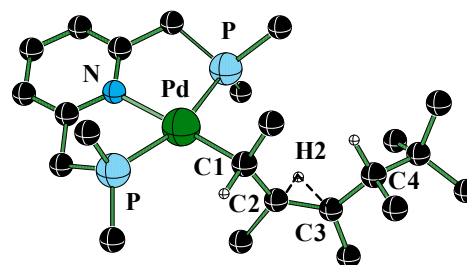

|          |        |        |       |
|----------|--------|--------|-------|
| C2-H2    | 1.23,  | 1.22,  | 1.26  |
| C3-H2    | 1.42,  | 1.47,  | 1.40  |
| C2-H2-C3 | 64.35, | 63.54, | 65.07 |

**TS8(d-e)**

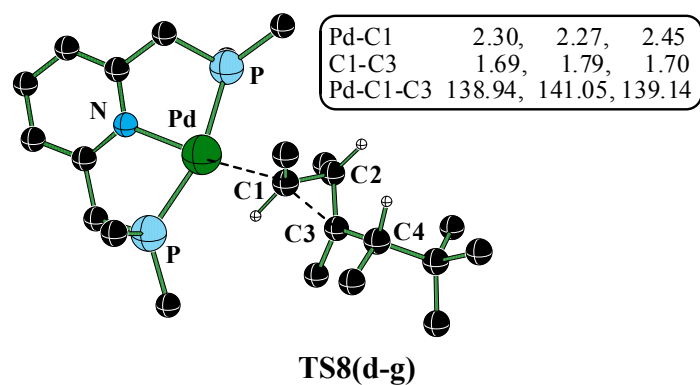

**Fig. S4.** The optimized geometries of the key transition states obtained at the mPW1K/LANL2DZ(Pd),6-31+G\*\* level of theory for the palladium-PNP pincer catalyzed coupling between *trans*-butene and *tert*-butylbutene. Parameters are given as in the order mPW1K, M06-2X and B3LYP levels of theory. (Distances are given in Å and angles in °).

Total electronic energy (in a.u) and Cartesian coordinates of geometries optimized at the mPW1K/6-31+G\*\* level of theory. Gsol indicates the single-point energies at the PCM<sub>(CH<sub>3</sub>NO<sub>2</sub>)</sub>/mPW1K/6-311++G\*\* level of theory.

| <b>TS1<sub>add</sub></b><br>Et = -1561.8570<br>Gsol = -1562.2470 |           |           |           | <b>TS1(c-d)</b><br>Et = -1561.8634<br>Gsol = -1562.2447 |           |           |           |
|------------------------------------------------------------------|-----------|-----------|-----------|---------------------------------------------------------|-----------|-----------|-----------|
| 6                                                                | -3.069247 | -1.001738 | 0.144761  | 6                                                       | -5.140280 | -0.566442 | -0.172403 |
| 6                                                                | -4.403270 | -0.957207 | 0.505981  | 6                                                       | -4.615498 | 0.677359  | 0.129188  |
| 6                                                                | -4.942313 | 0.228265  | 0.971689  | 6                                                       | -3.242484 | 0.835113  | 0.195177  |
| 6                                                                | -4.130380 | 1.343720  | 1.072425  | 7                                                       | -2.411125 | -0.192603 | -0.057024 |
| 6                                                                | -2.796008 | 1.246659  | 0.724335  | 6                                                       | -2.912664 | -1.402114 | -0.361614 |
| 7                                                                | -2.280333 | 0.085740  | 0.268438  | 6                                                       | -4.278118 | -1.620744 | -0.412858 |
| 6                                                                | -1.872917 | 2.415972  | 0.881015  | 6                                                       | -2.636249 | 2.143730  | 0.602401  |
| 15                                                               | -0.457112 | 2.288286  | -0.275251 | 15                                                      | -0.932749 | 2.321360  | -0.053991 |
| 6                                                                | 0.825039  | 3.389678  | 0.372783  | 6                                                       | -1.098367 | 3.051929  | -1.705610 |
| 78                                                               | -0.257624 | -0.021816 | -0.273390 | 78                                                      | -0.287702 | 0.113241  | 0.024287  |
| 6                                                                | 1.715783  | -0.102357 | -1.089180 | 6                                                       | 1.713114  | 0.580975  | 0.135020  |
| 1                                                                | 1.770509  | -0.972497 | -1.731231 | 1                                                       | 1.955023  | 1.206903  | -0.731199 |
| 6                                                                | -2.475405 | -2.241478 | -0.449100 | 6                                                       | -1.940246 | -2.492099 | -0.688463 |
| 15                                                               | -0.663934 | -2.308709 | -0.176879 | 15                                                      | -0.312029 | -2.204280 | 0.109752  |
| 6                                                                | -0.010890 | -3.448716 | -1.421763 | 6                                                       | -0.453008 | -2.914642 | 1.775152  |
| 6                                                                | -0.991361 | 3.006364  | -1.849937 | 6                                                       | -0.142133 | 3.590329  | 0.967377  |
| 6                                                                | -0.420994 | -3.112284 | 1.430018  | 6                                                       | 0.802949  | -3.324842 | -0.784490 |
| 6                                                                | 2.271842  | -0.220073 | 0.201216  | 6                                                       | 2.748458  | -0.542925 | 0.204895  |
| 1                                                                | 2.401335  | 0.655666  | 0.817541  | 1                                                       | 2.521588  | -1.208766 | 1.037392  |
| 6                                                                | 4.574721  | -0.626246 | -0.298014 | 6                                                       | 4.150480  | -0.036831 | 0.485320  |
| 6                                                                | 4.838304  | 0.048577  | -1.596696 | 6                                                       | 4.479129  | 0.150594  | 1.940059  |
| 6                                                                | 4.739988  | -0.109140 | 0.947150  | 6                                                       | 5.132034  | 0.055562  | -0.520184 |
| 6                                                                | 5.099776  | 1.312477  | 1.217296  | 6                                                       | 4.819185  | -0.241076 | -1.949505 |
| 6                                                                | 4.635337  | -0.981511 | 2.152729  | 6                                                       | 6.551860  | 0.401736  | -0.238005 |
| 1                                                                | 6.149501  | 1.362811  | 1.511007  | 1                                                       | 4.290164  | 1.068227  | -0.089973 |
| 1                                                                | 4.533375  | 1.708071  | 2.060194  | 1                                                       | -4.656130 | -2.601746 | -0.653457 |
| 1                                                                | -5.013472 | -1.840684 | 0.404991  | 1                                                       | -6.208867 | -0.712308 | -0.218358 |
| 1                                                                | -5.984212 | 0.283578  | 1.248854  | 1                                                       | -5.261915 | 1.517347  | 0.328485  |
| 1                                                                | -4.521928 | 2.282403  | 1.431119  | 1                                                       | -1.761934 | -2.494730 | -1.766103 |
| 1                                                                | -2.629071 | -2.221117 | -1.530498 | 1                                                       | -2.346553 | -3.468856 | -0.431146 |
| 1                                                                | -2.975893 | -3.132533 | -0.074595 | 1                                                       | -2.554506 | 2.168656  | 1.691327  |
| 1                                                                | -1.456585 | 2.407088  | 1.890870  | 1                                                       | -3.273108 | 2.977434  | 0.312163  |
| 1                                                                | -2.411869 | 3.354792  | 0.767324  | 1                                                       | 7.139225  | -0.469909 | -0.533831 |
| 1                                                                | 1.911209  | 0.820050  | -1.620582 | 1                                                       | 6.771199  | 0.615276  | 0.799161  |
| 1                                                                | 4.429035  | -1.699628 | -0.357635 | 1                                                       | 6.887867  | 1.222711  | -0.867012 |
| 1                                                                | 4.972113  | 1.966343  | 0.361373  | 1                                                       | 1.832793  | 1.218069  | 1.016460  |

|                                         |           |           |           |                                         |           |           |           |
|-----------------------------------------|-----------|-----------|-----------|-----------------------------------------|-----------|-----------|-----------|
| 1                                       | 2.265173  | -1.162423 | 0.724767  | 1                                       | 2.729085  | -1.143494 | -0.699302 |
| 1                                       | 4.107891  | -0.244263 | -2.349930 | 1                                       | -0.115538 | 3.179186  | -2.152340 |
| 1                                       | 4.853761  | 1.131924  | -1.530191 | 1                                       | -1.679498 | 2.392590  | -2.344882 |
| 1                                       | 5.810048  | -0.269343 | -1.975760 | 1                                       | -1.587585 | 4.022417  | -1.650476 |
| 1                                       | -0.856053 | -4.109919 | 1.425800  | 1                                       | -0.676003 | -3.978670 | 1.727081  |
| 1                                       | 0.639892  | -3.200712 | 1.650267  | 1                                       | 0.477569  | -2.775766 | 2.319814  |
| 1                                       | -0.886638 | -2.522237 | 2.215080  | 1                                       | -1.242194 | -2.407435 | 2.323975  |
| 1                                       | -1.248013 | 4.056476  | -1.724448 | 1                                       | 5.254284  | 0.882594  | 2.134354  |
| 1                                       | -0.192298 | 2.925635  | -2.582866 | 1                                       | 3.587679  | 0.445548  | 2.484933  |
| 1                                       | -1.856279 | 2.468359  | -2.229115 | 1                                       | 4.811245  | -0.807312 | 2.339714  |
| 1                                       | -0.492073 | -4.421309 | -1.336837 | 1                                       | 1.764578  | -3.381836 | -0.281990 |
| 1                                       | -0.180550 | -3.053953 | -2.420147 | 1                                       | 0.379036  | -4.327057 | -0.814890 |
| 1                                       | 1.058465  | -3.584647 | -1.278009 | 1                                       | 0.954232  | -2.975529 | -1.802513 |
| 1                                       | 1.690654  | 3.379773  | -0.285461 | 1                                       | 0.862046  | 3.783574  | 0.597916  |
| 1                                       | 0.452311  | 4.410965  | 0.426723  | 1                                       | -0.705932 | 4.520388  | 0.931520  |
| 1                                       | 1.130916  | 3.075070  | 1.366968  | 1                                       | -0.074818 | 3.252837  | 1.998144  |
| 1                                       | 5.576398  | -0.962287 | 2.702908  | 1                                       | 5.077342  | -1.287201 | -2.125110 |
| 1                                       | 3.876741  | -0.612260 | 2.845809  | 1                                       | 3.775371  | -0.104994 | -2.206933 |
| 1                                       | 4.420308  | -2.017170 | 1.902732  | 1                                       | 5.435541  | 0.357413  | -2.613276 |
| NImag = 1 (-219.2495 cm <sup>-1</sup> ) |           |           |           | NImag = 1 (-185.4331 cm <sup>-1</sup> ) |           |           |           |
| <b>TS1(c-e)</b>                         |           |           |           | <b>TS1(d-e)</b>                         |           |           |           |
| Et = -1561.8568                         |           |           |           | Et = -1561.8615                         |           |           |           |
| Gsol = -1562.2441                       |           |           |           | Gsol = -1562.2504                       |           |           |           |
| 6                                       | 4.051685  | -1.220749 | 1.243232  | 6                                       | 4.341798  | 0.290324  | -1.159968 |
| 6                                       | 2.732925  | -1.171240 | 0.829282  | 6                                       | 3.044119  | 0.585123  | -0.783216 |
| 7                                       | 2.209232  | -0.046942 | 0.305069  | 7                                       | 2.230260  | -0.367005 | -0.287443 |
| 6                                       | 2.975831  | 1.051780  | 0.168357  | 6                                       | 2.678446  | -1.629480 | -0.147202 |
| 6                                       | 4.293012  | 1.061250  | 0.591168  | 6                                       | 3.959586  | -1.979435 | -0.534283 |
| 6                                       | 4.838662  | -0.088320 | 1.133369  | 6                                       | 4.802678  | -1.008797 | -1.044181 |
| 6                                       | 1.830403  | -2.358010 | 0.976393  | 6                                       | 2.486961  | 1.966068  | -0.945786 |
| 15                                      | 0.479744  | -2.306387 | -0.263481 | 15                                      | 1.129599  | 2.267394  | 0.249802  |
| 6                                       | 1.166052  | -3.001998 | -1.791072 | 6                                       | 1.913085  | 2.780927  | 1.801928  |
| 78                                      | 0.176762  | -0.005429 | -0.331110 | 6                                       | -2.516987 | 1.234124  | -0.029928 |
| 15                                      | 0.551889  | 2.273302  | -0.318943 | 6                                       | -3.726875 | 0.805128  | -0.599370 |
| 6                                       | 0.245434  | 3.161411  | 1.233044  | 6                                       | -4.346175 | -0.517871 | -0.227213 |
| 6                                       | 2.375384  | 2.242609  | -0.513685 | 6                                       | -5.302214 | -0.270918 | 0.945259  |
| 6                                       | -1.750365 | 0.057087  | -1.062885 | 6                                       | 1.768880  | -2.628629 | 0.499060  |
| 6                                       | -2.865280 | -0.510002 | -0.263938 | 15                                      | 0.006681  | -2.177393 | 0.267219  |
| 6                                       | -4.266800 | -0.102770 | -0.373727 | 6                                       | -0.497031 | -2.938852 | -1.300567 |
| 6                                       | -3.812430 | 0.466051  | 0.980232  | 6                                       | -1.665520 | 0.572544  | 0.971108  |
| 6                                       | -4.366759 | -0.205676 | 2.219196  | 6                                       | -0.894683 | -3.062433 | 1.565138  |
| 1                                       | -2.046780 | 1.035240  | -1.437376 | 6                                       | 0.271600  | 3.742980  | -0.364057 |
| 6                                       | -0.061247 | 3.350342  | -1.639447 | 6                                       | -4.493976 | 1.741624  | -1.477612 |

|                                                         |           |           |           |                                                                  |           |           |           |
|---------------------------------------------------------|-----------|-----------|-----------|------------------------------------------------------------------|-----------|-----------|-----------|
| 6                                                       | -0.731838 | -3.529899 | 0.310037  | 6                                                                | -5.050518 | -1.204476 | -1.389387 |
| 1                                                       | -2.717944 | -1.492428 | 0.174354  | 1                                                                | -2.557336 | 0.613919  | -1.173260 |
| 6                                                       | -5.364794 | -1.135124 | -0.427328 | 1                                                                | 4.294415  | -2.998038 | -0.418285 |
| 6                                                       | -3.735710 | 1.976876  | 1.021332  | 1                                                                | 5.809140  | -1.260490 | -1.342564 |
| 1                                                       | -4.412151 | 0.695636  | -1.093884 | 1                                                                | 4.976414  | 1.070092  | -1.550266 |
| 1                                                       | 4.885677  | 1.955140  | 0.477895  | 1                                                                | 1.952624  | -2.623555 | 1.575941  |
| 1                                                       | 5.867343  | -0.103615 | 1.460385  | 1                                                                | 1.979591  | -3.636689 | 0.146361  |
| 1                                                       | 4.450108  | -2.133821 | 1.656387  | 1                                                                | 2.054942  | 2.061338  | -1.944414 |
| 1                                                       | 2.575584  | 2.170520  | -1.585143 | 1                                                                | 3.272736  | 2.715155  | -0.865507 |
| 1                                                       | 2.834085  | 3.166850  | -0.166835 | 1                                                                | -5.709180 | -1.222282 | 1.278310  |
| 1                                                       | 1.358371  | -2.330310 | 1.960895  | 1                                                                | -6.142685 | 0.353231  | 0.650664  |
| 1                                                       | 2.395584  | -3.286715 | 0.919188  | 1                                                                | -4.804799 | 0.197058  | 1.792096  |
| 1                                                       | -3.881894 | 0.179019  | 3.111997  | 1                                                                | -1.525388 | 1.314028  | 1.760873  |
| 1                                                       | -4.252123 | -1.285184 | 2.201634  | 1                                                                | -3.548469 | -1.169466 | 0.128509  |
| 1                                                       | -5.429768 | 0.014604  | 2.288759  | 1                                                                | 1.152097  | 2.961932  | 2.557169  |
| 1                                                       | -1.766710 | -0.590634 | -1.949802 | 1                                                                | 2.569276  | 1.994013  | 2.164404  |
| 1                                                       | -2.665268 | 0.148071  | 1.010668  | 1                                                                | 2.490398  | 3.692276  | 1.658651  |
| 1                                                       | 0.409468  | -2.998540 | -2.571982 | 1                                                                | -0.367407 | -4.018677 | -1.260805 |
| 1                                                       | 2.003842  | -2.397699 | -2.128818 | 1                                                                | -1.543116 | -2.723990 | -1.502968 |
| 1                                                       | 1.502257  | -4.024687 | -1.631745 | 1                                                                | 0.100073  | -2.537563 | -2.115308 |
| 1                                                       | 0.659892  | 4.166634  | 1.185730  | 1                                                                | -5.412890 | 2.005839  | -0.955294 |
| 1                                                       | -0.822634 | 3.235587  | 1.416887  | 1                                                                | -3.952324 | 2.659918  | -1.682504 |
| 1                                                       | 0.701705  | 2.626139  | 2.061728  | 1                                                                | -4.781703 | 1.276534  | -2.415552 |
| 1                                                       | -6.320051 | -0.693333 | -0.156819 | 1                                                                | -0.681836 | -4.128727 | 1.517782  |
| 1                                                       | -5.458647 | -1.512577 | -1.442368 | 1                                                                | -0.610227 | -2.684406 | 2.543617  |
| 1                                                       | -5.182537 | -1.980643 | 0.229935  | 1                                                                | -1.965643 | -2.924536 | 1.439318  |
| 1                                                       | 0.423973  | 4.323432  | -1.593967 | 1                                                                | -0.511005 | 4.036643  | 0.332117  |
| 1                                                       | 0.130922  | 2.900747  | -2.610061 | 1                                                                | 0.969014  | 4.574425  | -0.449713 |
| 1                                                       | -1.132706 | 3.500979  | -1.534087 | 1                                                                | -0.165244 | 3.555191  | -1.341525 |
| 1                                                       | -1.535038 | -3.631864 | -0.416475 | 78                                                               | 0.249455  | 0.120857  | 0.294836  |
| 1                                                       | -0.257794 | -4.503935 | 0.418364  | 1                                                                | -2.215284 | 2.232324  | -0.330218 |
| 1                                                       | -1.147498 | -3.239836 | 1.271741  | 1                                                                | -2.162119 | -0.280263 | 1.421616  |
| 1                                                       | -4.751556 | 2.366797  | 1.028501  | 1                                                                | -5.928391 | -0.651408 | -1.714940 |
| 1                                                       | -3.235676 | 2.321902  | 1.922066  | 1                                                                | -4.395625 | -1.342481 | -2.248788 |
| 1                                                       | -3.233600 | 2.385188  | 0.148377  | 1                                                                | -5.392561 | -2.186862 | -1.074274 |
| NImag = 1 (-279.3503 cm <sup>-1</sup> )                 |           |           |           | NImag = 1 (-345.0394 cm <sup>-1</sup> )                          |           |           |           |
| <b>TS1(d-g)</b><br>Et = -1561.8688<br>Gsol = -1562.2640 |           |           |           | <b>TS2<sub>add</sub></b><br>Et = -1601.1683<br>Gsol = -1601.5646 |           |           |           |
| 6                                                       | 4.405610  | 0.537678  | -0.487050 | 6                                                                | 3.122318  | 1.171717  | 0.122628  |
| 6                                                       | 3.041079  | 0.743097  | -0.411645 | 6                                                                | 4.462492  | 1.223355  | 0.459072  |
| 7                                                       | 2.204228  | -0.258313 | -0.053820 | 6                                                                | 5.099710  | 0.074628  | 0.891709  |
| 6                                                       | 2.706933  | -1.481420 | 0.231915  | 6                                                                | 4.377711  | -1.101528 | 0.985294  |

|    |           |           |           |    |           |           |           |
|----|-----------|-----------|-----------|----|-----------|-----------|-----------|
| 6  | 4.063305  | -1.731723 | 0.144089  | 6  | 3.033214  | -1.101276 | 0.663388  |
| 6  | 4.926475  | -0.713499 | -0.214791 | 7  | 2.421478  | 0.024608  | 0.239180  |
| 6  | 2.451512  | 2.071995  | -0.758927 | 6  | 2.205904  | -2.340679 | 0.815446  |
| 15 | 0.864546  | 2.305797  | 0.116180  | 15 | 0.759600  | -2.300830 | -0.308923 |
| 6  | 1.251709  | 2.941043  | 1.767172  | 6  | -0.426782 | -3.502599 | 0.342645  |
| 78 | 0.184619  | 0.076571  | 0.054905  | 78 | 0.385532  | -0.012671 | -0.257605 |
| 15 | 0.090873  | -2.257640 | 0.021896  | 6  | -1.609625 | -0.075746 | -1.032550 |
| 6  | 0.032380  | -3.032897 | -1.614035 | 1  | -1.748446 | 0.800364  | -1.653884 |
| 6  | 1.765750  | -2.546476 | 0.692936  | 6  | 2.424193  | 2.372990  | -0.435780 |
| 6  | -2.004409 | 0.434783  | 0.682680  | 15 | 0.619483  | 2.297065  | -0.125175 |
| 6  | -3.300264 | 0.619168  | -0.136234 | 6  | -0.147569 | 3.404900  | -1.333034 |
| 6  | -3.921322 | 1.990337  | -0.032607 | 6  | 1.311856  | -2.949992 | -1.907159 |
| 6  | -2.107678 | 0.479815  | -0.955713 | 6  | 0.353172  | 3.052231  | 1.501371  |
| 6  | -4.248599 | -0.575458 | -0.097001 | 6  | -2.109251 | -0.023859 | 0.280978  |
| 6  | -5.171177 | -0.585547 | -1.308947 | 1  | -2.150864 | -0.916816 | 0.884072  |
| 6  | -5.038865 | -0.643704 | 1.200948  | 6  | -4.542624 | 0.304663  | -0.210042 |
| 6  | -1.040334 | -3.195723 | 1.077865  | 6  | -4.774892 | -0.409359 | -1.501540 |
| 6  | -0.000911 | 3.637940  | -0.750748 | 6  | -4.499266 | -0.328045 | 0.998135  |
| 1  | -2.031074 | -0.492038 | 1.234572  | 6  | -4.653630 | -1.811073 | 1.153548  |
| 1  | -1.720526 | 1.359227  | -1.445996 | 6  | -4.453903 | 0.388310  | 2.310498  |
| 1  | 4.435009  | -2.718032 | 0.372276  | 1  | -5.695542 | -2.046146 | 1.375816  |
| 1  | 5.989242  | -0.891718 | -0.278981 | 1  | -4.075174 | -2.172521 | 2.003152  |
| 1  | 5.048670  | 1.355396  | -0.771358 | 1  | 5.001256  | 2.152852  | 0.364797  |
| 1  | 1.681418  | -2.498123 | 1.781147  | 1  | 6.147930  | 0.094701  | 1.149149  |
| 1  | 2.145056  | -3.536038 | 0.445552  | 1  | 4.846688  | -2.013607 | 1.318842  |
| 1  | 2.230726  | 2.098197  | -1.828512 | 1  | 2.557091  | 2.384171  | -1.520042 |
| 1  | 3.156999  | 2.875651  | -0.557123 | 1  | 2.863140  | 3.292628  | -0.053248 |
| 1  | -1.776820 | 1.321040  | 1.253665  | 1  | 1.812556  | -2.382997 | 1.833620  |
| 1  | -1.973715 | -0.446546 | -1.493395 | 1  | 2.812141  | -3.233120 | 0.671159  |
| 1  | -3.169800 | 2.774686  | -0.092054 | 1  | -1.742102 | -1.003189 | -1.574177 |
| 1  | -4.623841 | 2.150859  | -0.846581 | 1  | -4.375955 | -2.383515 | 0.275362  |
| 1  | -4.456472 | 2.109887  | 0.905435  | 1  | -2.177033 | 0.911891  | 0.812147  |
| 1  | 0.221751  | -4.101800 | -1.534457 | 1  | -4.048688 | -0.095945 | -2.253221 |
| 1  | -0.948629 | -2.890100 | -2.060999 | 1  | -4.757235 | -1.489764 | -1.429927 |
| 1  | 0.776108  | -2.584711 | -2.267829 | 1  | -5.752033 | -0.125319 | -1.894119 |
| 1  | 1.763256  | 3.899095  | 1.696122  | 1  | 0.713577  | 4.079193  | 1.505895  |
| 1  | 0.335899  | 3.077650  | 2.337370  | 1  | -0.706221 | 3.058073  | 1.744575  |
| 1  | 1.883274  | 2.235300  | 2.300401  | 1  | 0.877736  | 2.485253  | 2.265981  |
| 1  | -4.619746 | -0.517959 | -2.245824 | 1  | 1.651837  | -3.978787 | -1.805321 |
| 1  | -5.749771 | -1.505932 | -1.330177 | 1  | 0.492407  | -2.920641 | -2.621211 |
| 1  | -5.883225 | 0.236407  | -1.276192 | 1  | 2.123681  | -2.340705 | -2.295689 |
| 1  | -3.619382 | -1.470508 | -0.157152 | 1  | 0.264595  | 4.408414  | -1.244836 |
| 1  | -0.752014 | -4.245486 | 1.091290  | 1  | 0.021300  | 3.037886  | -2.342047 |
| 1  | -1.021264 | -2.812037 | 2.094824  | 1  | -1.219158 | 3.461224  | -1.156493 |
| 1  | -2.055484 | -3.128964 | 0.694577  | 1  | -1.302933 | -3.543158 | -0.300394 |
| 1  | -0.933697 | 3.872356  | -0.243970 | 1  | 0.018206  | -4.495543 | 0.372110  |



|                                        |           |           |           |                                         |           |           |           |
|----------------------------------------|-----------|-----------|-----------|-----------------------------------------|-----------|-----------|-----------|
| 1                                      | 0.614529  | 4.536151  | -0.754243 | 1                                       | -0.737051 | -3.226582 | 1.346961  |
| 1                                      | -0.215165 | 3.357852  | -1.778903 | 1                                       | -5.355874 | 0.152406  | 2.876265  |
| 1                                      | -4.396231 | -0.615154 | 2.080358  | 1                                       | -3.621019 | 0.031866  | 2.919943  |
| 1                                      | -5.748657 | 0.177325  | 1.277852  | 1                                       | -4.395194 | 1.467508  | 2.236820  |
| 1                                      | -5.614758 | -1.565087 | 1.241897  | 6                                       | -4.557191 | 1.794492  | -0.367194 |
| NImag = 1 (-46.2700 cm <sup>-1</sup> ) |           |           |           | 1                                       | -5.573330 | 2.127859  | -0.580935 |
|                                        |           |           |           | 1                                       | -4.216098 | 2.344504  | 0.502811  |
|                                        |           |           |           | 1                                       | -3.957287 | 2.091367  | -1.227978 |
|                                        |           |           |           | NImag = 1 (-179.3100 cm <sup>-1</sup> ) |           |           |           |
| <b>TS2(c-d)</b>                        |           |           |           | <b>TS2(c-e)</b>                         |           |           |           |
| Et = -1601.1731                        |           |           |           | Et = -1601.1647                         |           |           |           |
| Gsol = -1601.5596                      |           |           |           | Gsol = -1601.5571                       |           |           |           |
| 6                                      | 5.185366  | 0.006447  | 0.996494  | 6                                       | -4.263520 | 1.126562  | 1.142019  |
| 6                                      | 4.434152  | -1.149877 | 1.107012  | 6                                       | -2.933586 | 1.115082  | 0.762165  |
| 6                                      | 3.096232  | -1.123255 | 0.755014  | 7                                       | -2.359044 | 0.000396  | 0.271832  |
| 7                                      | 2.523229  | 0.000124  | 0.287041  | 6                                       | -3.084324 | -1.125968 | 0.135789  |
| 6                                      | 3.250965  | 1.123319  | 0.154019  | 6                                       | -4.410853 | -1.173258 | 0.525609  |
| 6                                      | 4.585643  | 1.157471  | 0.518206  | 6                                       | -5.008639 | -0.033865 | 1.033235  |
| 6                                      | 2.227975  | -2.334174 | 0.922496  | 6                                       | -2.076147 | 2.334732  | 0.910878  |
| 15                                     | 0.784370  | -2.283396 | -0.211792 | 15                                      | -0.688549 | 2.305926  | -0.288186 |
| 6                                      | 1.344273  | -3.011876 | -1.775759 | 6                                       | -1.350074 | 2.953089  | -1.847733 |
| 78                                     | 0.452709  | -0.000887 | -0.264020 | 78                                      | -0.308620 | 0.016194  | -0.307646 |
| 6                                      | -1.522890 | -0.016461 | -0.867369 | 15                                      | -0.608423 | -2.273172 | -0.270234 |
| 1                                      | -1.750375 | 0.917575  | -1.388751 | 6                                       | -0.312755 | -3.130535 | 1.301137  |
| 6                                      | 2.587457  | 2.318892  | -0.460463 | 6                                       | -2.426796 | -2.306660 | -0.510123 |
| 15                                     | 0.765411  | 2.280291  | -0.230797 | 6                                       | 1.643500  | 0.018986  | -0.977443 |
| 6                                      | 0.454767  | 3.140397  | 1.337906  | 6                                       | 2.696691  | 0.610299  | -0.116381 |
| 6                                      | -0.395761 | -3.478293 | 0.474223  | 6                                       | 4.138269  | 0.338364  | -0.161421 |
| 6                                      | 0.106118  | 3.370282  | -1.520340 | 6                                       | 3.629577  | -0.372999 | 1.134627  |
| 6                                      | -2.517326 | -0.224861 | 0.269391  | 6                                       | 4.071215  | 0.234594  | 2.453667  |
| 1                                      | -2.340992 | -1.190841 | 0.749064  | 1                                       | 1.974623  | -0.942868 | -1.359451 |
| 6                                      | -3.992388 | -0.253373 | -0.113429 | 6                                       | 0.069802  | -3.348778 | -1.560019 |
| 6                                      | -4.299122 | -0.977866 | -1.391828 | 6                                       | 0.468075  | 3.576000  | 0.297496  |
| 6                                      | -4.988775 | -0.001784 | 0.849501  | 1                                       | 2.445521  | 1.544493  | 0.376452  |
| 6                                      | -4.655805 | 0.345035  | 2.271487  | 6                                       | 5.048714  | 1.534071  | 0.051697  |
| 6                                      | -6.426703 | -0.385856 | 0.670818  | 6                                       | 3.650979  | -1.888520 | 1.099870  |
| 1                                      | 5.148721  | 2.070909  | 0.409692  | 1                                       | -4.970074 | -2.088651 | 0.413898  |
| 1                                      | 6.228056  | 0.009315  | 1.275936  | 1                                       | -6.045240 | -0.048158 | 1.334252  |
| 1                                      | 4.874503  | -2.063040 | 1.474979  | 1                                       | -4.702927 | 2.032499  | 1.528472  |
| 1                                      | 2.764183  | 2.298383  | -1.538226 | 1                                       | -2.602219 | -2.259074 | -1.587259 |
| 1                                      | 3.023003  | 3.243905  | -0.086570 | 1                                       | -2.862821 | -3.240131 | -0.158803 |
| 1                                      | 1.826777  | -2.342962 | 1.938336  | 1                                       | -1.632423 | 2.342260  | 1.908800  |
| 1                                      | 2.807460  | -3.247984 | 0.802420  | 1                                       | -2.670586 | 3.242159  | 0.819192  |

|                                                                                                                                        |           |           |           |                                                                                                                                        |           |           |           |
|----------------------------------------------------------------------------------------------------------------------------------------|-----------|-----------|-----------|----------------------------------------------------------------------------------------------------------------------------------------|-----------|-----------|-----------|
| 1                                                                                                                                      | -6.586182 | -1.304781 | 1.235743  | 1                                                                                                                                      | 3.582359  | -0.271173 | 3.281699  |
| 1                                                                                                                                      | -6.728404 | -0.567208 | -0.352128 | 1                                                                                                                                      | 3.857455  | 1.295507  | 2.529186  |
| 1                                                                                                                                      | -7.079026 | 0.368667  | 1.102266  | 1                                                                                                                                      | 5.144970  | 0.101338  | 2.563487  |
| 1                                                                                                                                      | -1.637245 | -0.802213 | -1.613448 | 1                                                                                                                                      | 1.675025  | 0.683681  | -1.851477 |
| 1                                                                                                                                      | -2.351627 | 0.515243  | 1.046827  | 1                                                                                                                                      | 2.475320  | -0.142665 | 1.132212  |
| 1                                                                                                                                      | 0.534422  | -2.993411 | -2.500927 | 1                                                                                                                                      | -0.571001 | 2.958379  | -2.606199 |
| 1                                                                                                                                      | 2.169250  | -2.429063 | -2.176942 | 1                                                                                                                                      | -2.159204 | 2.317747  | -2.198136 |
| 1                                                                                                                                      | 1.667028  | -4.041159 | -1.632580 | 1                                                                                                                                      | -1.720813 | 3.967884  | -1.717431 |
| 1                                                                                                                                      | 0.831749  | 4.160631  | 1.301402  | 1                                                                                                                                      | -0.698498 | -4.147369 | 1.259587  |
| 1                                                                                                                                      | -0.612677 | 3.170803  | 1.540656  | 1                                                                                                                                      | 0.752454  | -3.172802 | 1.509821  |
| 1                                                                                                                                      | 0.941344  | 2.608304  | 2.151204  | 1                                                                                                                                      | -0.802005 | -2.596185 | 2.111387  |
| 1                                                                                                                                      | -5.348913 | -0.990320 | -1.653669 | 1                                                                                                                                      | 6.022976  | 1.216305  | 0.414604  |
| 1                                                                                                                                      | -3.740143 | -0.555240 | -2.220575 | 1                                                                                                                                      | 5.207897  | 2.035531  | -0.900015 |
| 1                                                                                                                                      | -3.974649 | -2.010994 | -1.271450 | 1                                                                                                                                      | 4.649587  | 2.265111  | 0.748261  |
| 1                                                                                                                                      | -0.967082 | 3.488165  | -1.393796 | 1                                                                                                                                      | -0.385255 | -4.336191 | -1.511725 |
| 1                                                                                                                                      | 0.566116  | 4.354989  | -1.466128 | 1                                                                                                                                      | -0.113762 | -2.918951 | -2.541212 |
| 1                                                                                                                                      | 0.292479  | 2.941527  | -2.501435 | 1                                                                                                                                      | 1.142650  | -3.463649 | -1.427595 |
| 1                                                                                                                                      | -1.264775 | -3.548825 | -0.175622 | 1                                                                                                                                      | 1.296318  | 3.680115  | -0.400023 |
| 1                                                                                                                                      | 0.055704  | -4.466051 | 0.545498  | 1                                                                                                                                      | -0.034796 | 4.539447  | 0.361693  |
| 1                                                                                                                                      | -0.717986 | -3.165880 | 1.464046  | 1                                                                                                                                      | 0.854190  | 3.322807  | 1.281745  |
| 1                                                                                                                                      | -3.712977 | 0.860163  | 2.402971  | 1                                                                                                                                      | 4.681847  | -2.228186 | 1.034099  |
| 1                                                                                                                                      | -5.448717 | 0.937774  | 2.718635  | 1                                                                                                                                      | 3.223831  | -2.286974 | 2.016053  |
| 1                                                                                                                                      | -4.602339 | -0.591755 | 2.826761  | 1                                                                                                                                      | 3.111142  | -2.301461 | 0.253974  |
| 6                                                                                                                                      | -4.654865 | 1.383762  | -0.288459 | 6                                                                                                                                      | 4.681243  | -0.554012 | -1.258996 |
| 1                                                                                                                                      | -4.812689 | 2.089048  | 0.521291  | 1                                                                                                                                      | 4.789144  | 0.026769  | -2.171846 |
| 1                                                                                                                                      | -5.467784 | 1.386094  | -0.999957 | 1                                                                                                                                      | 5.671323  | -0.912258 | -0.987254 |
| 1                                                                                                                                      | -3.722695 | 1.677533  | -0.765944 | 1                                                                                                                                      | 4.064989  | -1.415647 | -1.487014 |
| NImag = 1 (-247.0783 cm <sup>-1</sup> )                                                                                                |           |           |           | NImag = 1 (-257.6856 cm <sup>-1</sup> )                                                                                                |           |           |           |
| <p style="text-align: center;"><b>TS2(d-e)</b><br/>                     Et = -1601.1628<br/>                     Gsol = -1601.5555</p> |           |           |           | <p style="text-align: center;"><b>TS2(d-g)</b><br/>                     Et = -1601.1726<br/>                     Gsol = -1601.5727</p> |           |           |           |
| 6                                                                                                                                      | 4.410984  | 0.630454  | -1.214845 | 6                                                                                                                                      | 4.507059  | 0.671623  | -0.542720 |
| 6                                                                                                                                      | 3.098241  | 0.801681  | -0.814532 | 6                                                                                                                                      | 3.137130  | 0.825967  | -0.446549 |
| 7                                                                                                                                      | 2.386295  | -0.220787 | -0.303652 | 7                                                                                                                                      | 2.342545  | -0.201039 | -0.065787 |
| 6                                                                                                                                      | 2.956676  | -1.433448 | -0.164877 | 6                                                                                                                                      | 2.897688  | -1.400690 | 0.221556  |
| 6                                                                                                                                      | 4.258480  | -1.661493 | -0.572867 | 6                                                                                                                                      | 4.260984  | -1.601066 | 0.114717  |
| 6                                                                                                                                      | 4.995528  | -0.618254 | -1.103553 | 6                                                                                                                                      | 5.080028  | -0.555603 | -0.267372 |
| 6                                                                                                                                      | 2.410971  | 2.123599  | -0.958109 | 6                                                                                                                                      | 2.494022  | 2.127463  | -0.793265 |
| 15                                                                                                                                     | 1.072919  | 2.291078  | 0.284384  | 15                                                                                                                                     | 0.923456  | 2.318248  | 0.118232  |
| 6                                                                                                                                      | 1.874443  | 2.808402  | 1.826721  | 6                                                                                                                                      | 1.338024  | 2.942139  | 1.767457  |
| 6                                                                                                                                      | -2.454961 | 1.135360  | 0.166257  | 78                                                                                                                                     | 0.308095  | 0.057490  | 0.064342  |
| 6                                                                                                                                      | -3.704900 | 0.912406  | -0.442728 | 15                                                                                                                                     | 0.313196  | -2.278185 | 0.049411  |

|    |           |           |           |   |           |           |           |
|----|-----------|-----------|-----------|---|-----------|-----------|-----------|
| 6  | -4.488112 | -0.400626 | -0.367559 | 6 | 0.270438  | -3.059076 | -1.584146 |
| 6  | -4.975635 | -0.536550 | 1.081951  | 6 | 2.004882  | -2.494718 | 0.702563  |
| 6  | 2.153552  | -2.508169 | 0.498622  | 6 | -1.916966 | 0.287701  | 0.728735  |
| 15 | 0.359179  | -2.239683 | 0.235782  | 6 | -3.171226 | 0.688123  | -0.064850 |
| 6  | -0.012673 | -3.026410 | -1.355877 | 6 | -3.533894 | 2.145721  | 0.115355  |
| 6  | -1.573188 | 0.312072  | 1.005018  | 6 | -2.002011 | 0.429071  | -0.900824 |
| 6  | -0.471060 | -3.233251 | 1.501980  | 6 | -4.366980 | -0.290259 | -0.121584 |
| 6  | 0.119486  | 3.738433  | -0.256016 | 6 | -3.954750 | -1.754331 | -0.010093 |
| 6  | -4.382092 | 2.114846  | -1.032305 | 6 | -5.336032 | 0.009561  | 1.021508  |
| 6  | -5.704775 | -0.379532 | -1.293132 | 6 | -0.736340 | -3.280055 | 1.129653  |
| 1  | -2.583429 | 0.751860  | -1.091044 | 6 | 0.052452  | 3.665920  | -0.721335 |
| 1  | 4.691070  | -2.642659 | -0.457826 | 1 | -1.991371 | -0.691395 | 1.169523  |
| 1  | 6.015627  | -0.774927 | -1.420094 | 1 | -1.547621 | 1.273888  | -1.393807 |
| 1  | 4.961191  | 1.465632  | -1.618381 | 1 | 4.671788  | -2.570943 | 0.346139  |
| 1  | 2.325640  | -2.462553 | 1.576305  | 1 | 6.147594  | -0.694360 | -0.347238 |
| 1  | 2.467397  | -3.495885 | 0.166222  | 1 | 5.113019  | 1.510710  | -0.845579 |
| 1  | 1.939625  | 2.180644  | -1.941686 | 1 | 1.929330  | -2.439684 | 1.791119  |
| 1  | 3.125582  | 2.942576  | -0.897216 | 1 | 2.416997  | -3.472168 | 0.459615  |
| 1  | -5.583791 | -1.434000 | 1.169409  | 1 | 2.244762  | 2.134498  | -1.856925 |
| 1  | -5.600880 | 0.305999  | 1.371854  | 1 | 3.174449  | 2.958314  | -0.617008 |
| 1  | -4.158514 | -0.613077 | 1.794685  | 1 | -1.602057 | 1.084580  | 1.386434  |
| 1  | -1.439792 | 0.911435  | 1.911341  | 1 | -1.962212 | -0.497532 | -1.450822 |
| 1  | 1.130561  | 2.916816  | 2.612253  | 1 | -2.656126 | 2.779751  | 0.018484  |
| 1  | 2.591640  | 2.055067  | 2.141802  | 1 | -4.247656 | 2.467940  | -0.637504 |
| 1  | 2.387287  | 3.759051  | 1.694044  | 1 | -3.969511 | 2.326474  | 1.093708  |
| 1  | 0.234862  | -4.085720 | -1.321610 | 1 | 0.503821  | -4.119217 | -1.504405 |
| 1  | -1.067539 | -2.922010 | -1.592014 | 1 | -0.719682 | -2.956700 | -2.021658 |
| 1  | 0.564555  | -2.550376 | -2.144363 | 1 | 0.988797  | -2.581898 | -2.245724 |
| 1  | -5.225527 | 2.362573  | -0.388012 | 1 | 1.834136  | 3.908190  | 1.695177  |
| 1  | -3.731144 | 2.982850  | -1.070359 | 1 | 0.432628  | 3.060071  | 2.358146  |
| 1  | -4.781770 | 1.922199  | -2.021964 | 1 | 1.990759  | 2.240513  | 2.280173  |
| 1  | -0.145362 | -4.270062 | 1.443121  | 1 | -4.822335 | -2.382927 | -0.195239 |
| 1  | -0.245349 | -2.844086 | 2.491344  | 1 | -3.204616 | -2.044695 | -0.747264 |
| 1  | -1.548021 | -3.207780 | 1.356313  | 1 | -3.601005 | -2.003307 | 0.989562  |
| 1  | -0.635528 | 3.991397  | 0.485224  | 1 | -0.349414 | -4.297249 | 1.167131  |
| 1  | 0.779914  | 4.597745  | -0.359720 | 1 | -0.749702 | -2.871863 | 2.137128  |
| 1  | -0.358429 | 3.553271  | -1.214632 | 1 | -1.751740 | -3.317081 | 0.746998  |
| 78 | 0.370375  | 0.072583  | 0.297062  | 1 | -0.827621 | 3.962099  | -0.157658 |
| 1  | -2.113689 | 2.157033  | 0.039557  | 1 | 0.711854  | 4.529979  | -0.790141 |
| 1  | -2.035358 | -0.617935 | 1.305773  | 1 | -0.246623 | 3.376640  | -1.725394 |
| 1  | -6.413365 | 0.403787  | -1.037930 | 1 | -4.840763 | -0.030066 | 1.991690  |
| 1  | -5.427485 | -0.273029 | -2.340382 | 1 | -5.808026 | 0.983045  | 0.917270  |
| 1  | -6.230484 | -1.326041 | -1.194705 | 1 | -6.133631 | -0.730061 | 1.030620  |
| 6  | -3.626287 | -1.595651 | -0.776243 | 6 | -5.075323 | -0.093345 | -1.463978 |
| 1  | -3.324063 | -1.516783 | -1.820805 | 1 | -5.949060 | -0.739000 | -1.518960 |
| 1  | -2.736758 | -1.706467 | -0.164845 | 1 | -5.425946 | 0.926291  | -1.602280 |

|                                                                  |           |           |           |                                                         |           |           |           |
|------------------------------------------------------------------|-----------|-----------|-----------|---------------------------------------------------------|-----------|-----------|-----------|
| 1                                                                | -4.211535 | -2.506667 | -0.676832 | 1                                                       | -4.427312 | -0.345626 | -2.303061 |
| NImag = 1 (-417.8273 cm <sup>-1</sup> )                          |           |           |           | NImag = 1 (-44.1704 cm <sup>-1</sup> )                  |           |           |           |
| <b>TS3<sub>add</sub></b><br>Et = -1679.7801<br>Gsol = -1680.2125 |           |           |           | <b>TS3(c-d)</b><br>Et = -1679.7826<br>Gsol = -1680.1979 |           |           |           |
| 6                                                                | -3.381753 | -1.247331 | 0.332441  | 6                                                       | -5.515367 | -0.728017 | -0.687213 |
| 6                                                                | -4.640279 | -1.375984 | 0.890817  | 6                                                       | -5.078659 | 0.543419  | -0.361007 |
| 6                                                                | -5.202154 | -0.301095 | 1.555504  | 6                                                       | -3.734178 | 0.754165  | -0.110937 |
| 6                                                                | -4.487384 | 0.879273  | 1.653307  | 7                                                       | -2.843350 | -0.249828 | -0.207437 |
| 6                                                                | -3.221736 | 0.954736  | 1.102126  | 6                                                       | -3.257653 | -1.486203 | -0.533948 |
| 7                                                                | -2.683949 | -0.099219 | 0.453167  | 6                                                       | -4.594533 | -1.756815 | -0.766995 |
| 6                                                                | -2.391909 | 2.194073  | 1.242503  | 6                                                       | -3.231984 | 2.096628  | 0.327805  |
| 15                                                               | -1.179938 | 2.321207  | -0.126191 | 15                                                      | -1.460701 | 2.315003  | -0.093317 |
| 6                                                                | 0.084619  | 3.496129  | 0.418031  | 6                                                       | -1.416560 | 2.979809  | -1.779754 |
| 78                                                               | -0.769882 | 0.054260  | -0.389333 | 78                                                      | -0.763217 | 0.136932  | 0.158923  |
| 6                                                                | 1.047108  | 0.244566  | -1.499872 | 6                                                       | 1.183786  | 0.690660  | 0.534018  |
| 1                                                                | 1.081815  | -0.568480 | -2.213981 | 1                                                       | 1.498362  | 1.368138  | -0.265130 |
| 6                                                                | -2.780201 | -2.357776 | -0.472165 | 6                                                       | -2.213435 | -2.548470 | -0.680312 |
| 15                                                               | -0.949566 | -2.262056 | -0.475020 | 15                                                      | -0.729256 | -2.175834 | 0.334743  |
| 6                                                                | -0.398819 | -3.210508 | -1.914726 | 6                                                       | -1.097880 | -2.828255 | 1.988620  |
| 6                                                                | -2.033560 | 3.105880  | -1.518026 | 6                                                       | -0.859585 | 3.646870  | 0.976228  |
| 6                                                                | -0.392049 | -3.183904 | 0.983428  | 6                                                       | 0.535651  | -3.290839 | -0.339569 |
| 6                                                                | 1.791838  | 0.096561  | -0.313062 | 6                                                       | 2.259955  | -0.391166 | 0.672954  |
| 1                                                                | 1.938977  | 0.937608  | 0.345047  | 1                                                       | 1.992273  | -1.071416 | 1.483683  |
| 6                                                                | 4.027740  | 0.007023  | -1.141869 | 6                                                       | 3.595751  | 0.160696  | 1.099321  |
| 6                                                                | 3.960191  | 0.852898  | -2.368701 | 6                                                       | 3.645522  | 0.539638  | 2.553891  |
| 6                                                                | 4.431894  | 0.417329  | 0.090912  | 6                                                       | 4.747620  | 0.277575  | 0.288836  |
| 6                                                                | 4.670539  | 1.869664  | 0.363245  | 6                                                       | 4.838454  | -0.190878 | -1.180839 |
| 6                                                                | 4.788615  | -0.557844 | 1.203469  | 6                                                       | 4.844912  | -1.725062 | -1.168880 |
| 6                                                                | 4.638153  | -2.019705 | 0.794954  | 6                                                       | 6.040028  | 0.679271  | 0.939584  |
| 6                                                                | 6.264634  | -0.317954 | 1.560271  | 6                                                       | 6.147538  | 0.279055  | -1.824021 |
| 6                                                                | 3.936024  | -0.309369 | 2.454165  | 6                                                       | 3.712757  | 0.363714  | -2.060324 |
| 1                                                                | 5.681746  | 2.136646  | 0.052436  | 1                                                       | 3.914247  | 1.246223  | 0.360657  |
| 1                                                                | 4.590248  | 2.117780  | 1.416696  | 1                                                       | -4.903024 | -2.758313 | -1.021881 |
| 1                                                                | -5.177762 | -2.305305 | 0.787988  | 1                                                       | -6.561687 | -0.914790 | -0.875880 |
| 1                                                                | -6.187617 | -0.380881 | 1.989011  | 1                                                       | -5.773691 | 1.364503  | -0.284294 |
| 1                                                                | -4.899256 | 1.734866  | 2.164569  | 1                                                       | -1.880119 | -2.575048 | -1.720139 |
| 1                                                                | -3.101821 | -2.252996 | -1.510964 | 1                                                       | -2.619978 | -3.531946 | -0.450495 |
| 1                                                                | -3.135366 | -3.326959 | -0.126830 | 1                                                       | -3.301339 | 2.157973  | 1.416135  |
| 1                                                                | -1.815743 | 2.133287  | 2.168560  | 1                                                       | -3.848995 | 2.897101  | -0.076422 |
| 1                                                                | -3.022218 | 3.078341  | 1.316438  | 1                                                       | 6.683334  | -0.200721 | 0.933691  |
| 1                                                                | 1.067820  | 1.217497  | -1.973021 | 1                                                       | 5.939231  | 0.997961  | 1.967319  |
| 1                                                                | 3.986822  | -1.058328 | -1.324319 | 1                                                       | 6.554630  | 1.451032  | 0.378324  |

|                                         |           |           |           |                                         |           |           |           |
|-----------------------------------------|-----------|-----------|-----------|-----------------------------------------|-----------|-----------|-----------|
| 1                                       | 3.997522  | 2.514003  | -0.195964 | 1                                       | 1.159241  | 1.288096  | 1.448979  |
| 1                                       | 1.955999  | -0.874385 | 0.122769  | 1                                       | 2.338641  | -0.981027 | -0.229317 |
| 1                                       | 4.916454  | -2.657230 | 1.630851  | 1                                       | -0.385270 | 3.130644  | -2.088873 |
| 1                                       | 3.613208  | -2.279572 | 0.525525  | 1                                       | -1.877640 | 2.274730  | -2.466382 |
| 1                                       | 5.286112  | -2.281017 | -0.039178 | 1                                       | -1.942213 | 3.931146  | -1.834194 |
| 1                                       | 6.571687  | -1.028750 | 2.324937  | 1                                       | -1.293036 | -3.898119 | 1.949427  |
| 1                                       | 6.909154  | -0.460616 | 0.694855  | 1                                       | -0.259395 | -2.648280 | 2.656569  |
| 1                                       | 6.436498  | 0.680102  | 1.955199  | 1                                       | -1.967484 | -2.319533 | 2.396525  |
| 1                                       | 3.211353  | 0.482198  | -3.066169 | 1                                       | 4.130751  | 1.490658  | 2.747018  |
| 1                                       | 3.759286  | 1.901528  | -2.168934 | 1                                       | 2.643864  | 0.582660  | 2.966226  |
| 1                                       | 4.915928  | 0.803774  | -2.892005 | 1                                       | 4.202318  | -0.228467 | 3.091534  |
| 1                                       | -0.726331 | -4.218176 | 0.927143  | 1                                       | 4.981263  | -2.087014 | -2.185375 |
| 1                                       | 0.693426  | -3.175323 | 1.041610  | 1                                       | 5.670154  | -2.114531 | -0.575157 |
| 1                                       | -0.788176 | -2.728635 | 1.887417  | 1                                       | 3.922480  | -2.152908 | -0.785288 |
| 1                                       | -2.364129 | 4.107350  | -1.249375 | 1                                       | 6.169789  | -0.078211 | -2.850385 |
| 1                                       | -1.362369 | 3.174825  | -2.370629 | 1                                       | 6.224266  | 1.364162  | -1.862082 |
| 1                                       | -2.894475 | 2.510429  | -1.810594 | 1                                       | 7.032031  | -0.117328 | -1.333933 |
| 1                                       | 4.260596  | -0.977506 | 3.249115  | 1                                       | 3.883801  | 0.040149  | -3.084087 |
| 1                                       | 4.032886  | 0.704618  | 2.834192  | 1                                       | 2.716678  | 0.036153  | -1.785919 |
| 1                                       | 2.878681  | -0.508475 | 2.279333  | 1                                       | 3.726878  | 1.453845  | -2.067765 |
| 1                                       | -0.784101 | -4.227460 | -1.869033 | 1                                       | 1.422302  | -3.281799 | 0.288388  |
| 1                                       | -0.743320 | -2.740142 | -2.831992 | 1                                       | 0.155475  | -4.310405 | -0.371454 |
| 1                                       | 0.687386  | -3.259472 | -1.934518 | 1                                       | 0.809422  | -2.985852 | -1.346200 |
| 1                                       | 0.825644  | 3.629141  | -0.366757 | 1                                       | 0.179561  | 3.863308  | 0.740543  |
| 1                                       | -0.364205 | 4.465235  | 0.628197  | 1                                       | -1.441777 | 4.553903  | 0.826193  |
| 1                                       | 0.579568  | 3.135494  | 1.315856  | 1                                       | -0.924471 | 3.349115  | 2.019407  |
| NImag = 1 (-243.3073 cm <sup>-1</sup> ) |           |           |           | NImag = 1 (-282.0931 cm <sup>-1</sup> ) |           |           |           |
| <b>TS3(c-e)</b>                         |           |           |           | <b>TS3(d-e)</b>                         |           |           |           |
| Et = -1679.7807                         |           |           |           | Et = -1679.7846                         |           |           |           |
| Gsol = -1680.2099                       |           |           |           | Gsol = -1680.2095                       |           |           |           |
| 6                                       | -4.125104 | 1.623747  | 1.476770  | 6                                       | -4.582483 | 0.073630  | 1.623641  |
| 6                                       | -2.865954 | 1.406506  | 0.946826  | 6                                       | -3.361471 | 0.439742  | 1.086956  |
| 7                                       | -2.541972 | 0.232385  | 0.375410  | 7                                       | -2.606347 | -0.444142 | 0.407226  |
| 6                                       | -3.455319 | -0.754954 | 0.306162  | 6                                       | -3.041935 | -1.706784 | 0.232213  |
| 6                                       | -4.719966 | -0.597650 | 0.844398  | 6                                       | -4.244288 | -2.128146 | 0.771000  |
| 6                                       | -5.060666 | 0.605891  | 1.435033  | 6                                       | -5.024932 | -1.228394 | 1.474118  |
| 6                                       | -1.804142 | 2.458713  | 1.014350  | 6                                       | -2.820537 | 1.824503  | 1.264969  |
| 15                                      | -0.586722 | 2.246657  | -0.342319 | 15                                      | -1.678232 | 2.251896  | -0.104700 |
| 6                                       | -1.334782 | 3.021547  | -1.802561 | 6                                       | -2.725094 | 2.772437  | -1.491091 |
| 78                                      | -0.583694 | -0.080021 | -0.418180 | 6                                       | 1.947532  | 1.533877  | -0.512982 |
| 15                                      | -1.266573 | -2.283440 | -0.370579 | 6                                       | 3.248338  | 1.323457  | -0.022410 |
| 6                                       | -0.950522 | -3.220950 | 1.148718  | 6                                       | 3.979270  | 0.027302  | -0.285102 |
| 6                                       | -3.077437 | -2.005928 | -0.425062 | 6                                       | 4.919011  | 0.282005  | -1.467486 |

|   |           |           |           |    |           |           |           |
|---|-----------|-----------|-----------|----|-----------|-----------|-----------|
| 6 | 1.242056  | -0.522333 | -1.269351 | 6  | -2.212373 | -2.620573 | -0.615637 |
| 6 | 2.451312  | 0.322886  | -1.079327 | 15 | -0.444342 | -2.138224 | -0.571898 |
| 6 | 3.839383  | -0.174047 | -1.104255 | 6  | 0.265893  | -3.004435 | 0.854111  |
| 6 | 3.677427  | 0.362120  | 0.314947  | 6  | 1.068105  | 0.663421  | -1.302233 |
| 6 | 4.267030  | 1.738899  | 0.540782  | 6  | 0.308534  | -2.887181 | -2.038115 |
| 1 | 1.523419  | -1.561498 | -1.127497 | 6  | -0.838458 | 3.764349  | 0.444300  |
| 6 | -0.894890 | -3.410848 | -1.736794 | 6  | 3.958734  | 2.500410  | 0.576791  |
| 6 | 0.776905  | 3.353367  | 0.122993  | 6  | 4.649145  | -0.656220 | 0.944910  |
| 1 | 2.352350  | 1.365895  | -1.362245 | 6  | 3.709152  | -0.586141 | 2.146973  |
| 6 | 4.856504  | 0.421893  | -2.046895 | 6  | 6.013128  | -0.075793 | 1.314189  |
| 6 | 3.793286  | -0.651514 | 1.483933  | 6  | 4.850938  | -2.130473 | 0.588372  |
| 6 | 5.251133  | -1.113359 | 1.531051  | 1  | 2.208067  | 1.090627  | 0.711032  |
| 6 | 2.884381  | -1.861803 | 1.299298  | 1  | -4.569388 | -3.145814 | 0.623546  |
| 6 | 3.421334  | 0.021423  | 2.803775  | 1  | -5.970146 | -1.536534 | 1.894765  |
| 1 | 3.874207  | -1.257302 | -1.114572 | 1  | -5.170759 | 0.800306  | 2.161194  |
| 1 | -5.432336 | -1.405076 | 0.783453  | 1  | -2.537751 | -2.526090 | -1.654164 |
| 1 | -6.045524 | 0.750599  | 1.852695  | 1  | -2.356671 | -3.660898 | -0.329943 |
| 1 | -4.361106 | 2.575422  | 1.925944  | 1  | -2.239156 | 1.868005  | 2.188526  |
| 1 | -3.343899 | -1.889954 | -1.477997 | 1  | -3.627639 | 2.548866  | 1.359787  |
| 1 | -3.630984 | -2.864169 | -0.048735 | 1  | 5.395473  | -0.645758 | -1.769621 |
| 1 | -1.254324 | 2.355672  | 1.952352  | 1  | 5.706204  | 0.989561  | -1.223666 |
| 1 | -2.241819 | 3.455640  | 1.007634  | 1  | 4.375230  | 0.663108  | -2.330055 |
| 1 | 3.890148  | 2.198706  | 1.447160  | 1  | 0.763326  | 1.275801  | -2.155599 |
| 1 | 4.078859  | 2.411584  | -0.289629 | 1  | 3.224321  | -0.682021 | -0.625011 |
| 1 | 5.346160  | 1.643655  | 0.633272  | 1  | -2.105298 | 3.032557  | -2.345704 |
| 1 | 1.075203  | -0.403769 | -2.349449 | 1  | -3.381468 | 1.957382  | -1.784480 |
| 1 | 2.471870  | 0.581672  | 0.300476  | 1  | -3.326513 | 3.636820  | -1.216335 |
| 1 | -0.668397 | 2.928158  | -2.656506 | 1  | 0.144358  | -4.080457 | 0.744362  |
| 1 | -2.267449 | 2.519837  | -2.046960 | 1  | 1.326133  | -2.781367 | 0.935936  |
| 1 | -1.531626 | 4.076536  | -1.622125 | 1  | -0.224908 | -2.680449 | 1.768193  |
| 1 | -1.509144 | -4.155028 | 1.141176  | 1  | 4.771539  | 2.777751  | -0.091676 |
| 1 | 0.108397  | -3.450937 | 1.230426  | 1  | 3.306726  | 3.362971  | 0.680374  |
| 1 | -1.244204 | -2.635043 | 2.015738  | 1  | 4.397532  | 2.272515  | 1.541025  |
| 1 | 5.865862  | 0.200913  | -1.709795 | 1  | 5.303820  | -2.659081 | 1.424326  |
| 1 | 4.738990  | -0.020875 | -3.032602 | 1  | 3.904615  | -2.623756 | 0.362844  |
| 1 | 4.762150  | 1.498302  | -2.154671 | 1  | 5.510385  | -2.261526 | -0.266519 |
| 1 | 3.438918  | -0.716242 | 3.602448  | 1  | 4.090079  | -1.196731 | 2.962750  |
| 1 | 4.118320  | 0.805881  | 3.085471  | 1  | 3.602779  | 0.423887  | 2.544448  |
| 1 | 2.415028  | 0.442465  | 2.774138  | 1  | 2.714454  | -0.967355 | 1.903013  |
| 1 | 5.376104  | -1.812831 | 2.354834  | 1  | 6.410457  | -0.610647 | 2.174473  |
| 1 | 5.547058  | -1.626792 | 0.618204  | 1  | 6.732344  | -0.194425 | 0.507333  |
| 1 | 5.940305  | -0.290256 | 1.703780  | 1  | 5.983946  | 0.976483  | 1.583758  |
| 1 | 3.022309  | -2.531495 | 2.144931  | 1  | 0.128172  | -3.960352 | -2.052598 |
| 1 | 1.834689  | -1.569907 | 1.276579  | 1  | -0.103892 | -2.442854 | -2.940105 |
| 1 | 3.114140  | -2.437659 | 0.405163  | 1  | 1.383315  | -2.723283 | -2.031625 |
| 1 | -1.467782 | -4.330793 | -1.637515 | 1  | -0.222575 | 4.164401  | -0.358193 |



|                                                         |           |           |           |                                                                  |           |           |           |
|---------------------------------------------------------|-----------|-----------|-----------|------------------------------------------------------------------|-----------|-----------|-----------|
| 1                                                       | -1.134447 | -2.941502 | -2.687166 | 1                                                                | -1.573872 | 4.523510  | 0.705268  |
| 1                                                       | 0.162131  | -3.665282 | -1.732565 | 1                                                                | -0.218335 | 3.569604  | 1.315423  |
| 1                                                       | 1.474713  | 3.465094  | -0.703097 | 78                                                               | -0.733840 | 0.146483  | -0.399124 |
| 1                                                       | 0.385883  | 4.341824  | 0.358666  | 1                                                                | 1.567363  | 2.530631  | -0.315807 |
| 1                                                       | 1.305394  | 2.973627  | 0.993471  | 1                                                                | 1.603056  | -0.193105 | -1.696129 |
| NImag = 1 (-301.2108 cm <sup>-1</sup> )                 |           |           |           | NImag = 1 (-336.3576 cm <sup>-1</sup> )                          |           |           |           |
| <b>TS3(d-g)</b><br>Et = -1679.7795<br>Gsol = -1680.2142 |           |           |           | <b>TS4<sub>add</sub></b><br>Et = -1758.4001<br>Gsol = -1758.8435 |           |           |           |
| 6                                                       | 4.911816  | 0.633666  | -0.190763 | 6                                                                | 4.516365  | -2.235275 | -0.296716 |
| 6                                                       | 3.540735  | 0.800582  | -0.237564 | 6                                                                | 5.448598  | -1.350187 | -0.806040 |
| 7                                                       | 2.701621  | -0.218453 | 0.058425  | 6                                                                | 5.076948  | -0.036567 | -1.027337 |
| 6                                                       | 3.212226  | -1.423254 | 0.401397  | 6                                                                | 3.780731  | 0.358943  | -0.751111 |
| 6                                                       | 4.577302  | -1.636320 | 0.437261  | 7                                                                | 2.880717  | -0.509732 | -0.248063 |
| 6                                                       | 5.441336  | -0.598661 | 0.142627  | 6                                                                | 3.239605  | -1.786629 | -0.010648 |
| 6                                                       | 2.947673  | 2.107232  | -0.647557 | 6                                                                | 3.327249  | 1.755871  | -1.042066 |
| 15                                                      | 1.299265  | 2.313418  | 0.112224  | 15                                                               | 1.912391  | 2.221661  | 0.024616  |
| 6                                                       | 1.571301  | 2.904474  | 1.802833  | 78                                                               | 0.919291  | 0.144316  | 0.199924  |
| 78                                                      | 0.666420  | 0.058623  | -0.026409 | 15                                                               | 0.520391  | -2.150580 | 0.242406  |
| 15                                                      | 0.654878  | -2.274860 | -0.050483 | 6                                                                | 0.118291  | -2.893960 | -1.364094 |
| 6                                                       | 0.788498  | -3.055613 | -1.679121 | 6                                                                | 2.230316  | -2.691370 | 0.621527  |
| 6                                                       | 2.262806  | -2.508694 | 0.784366  | 6                                                                | 2.610493  | 2.880775  | 1.561861  |
| 6                                                       | -1.612892 | 0.312292  | 0.371514  | 6                                                                | -0.952143 | 0.968599  | 0.844512  |
| 6                                                       | -2.767967 | 0.718517  | -0.563516 | 6                                                                | -1.809020 | 0.409814  | -0.164487 |
| 6                                                       | -3.071071 | 2.200185  | -0.524242 | 6                                                                | -1.765165 | 0.884372  | -1.579521 |
| 6                                                       | -1.514401 | 0.412488  | -1.256340 | 6                                                                | -1.167257 | 0.574940  | 2.288361  |
| 6                                                       | -3.968878 | -0.242484 | -0.705014 | 6                                                                | -3.811336 | 1.169698  | 0.564614  |
| 6                                                       | -3.544092 | -1.704934 | -0.792542 | 6                                                                | -4.581412 | 0.551197  | -0.383357 |
| 6                                                       | -5.119077 | -0.052758 | 0.344331  | 6                                                                | -5.076930 | -0.875983 | -0.240983 |
| 6                                                       | -6.081968 | -1.244272 | 0.270660  | 6                                                                | -6.611200 | -0.847813 | -0.347267 |
| 6                                                       | -4.576406 | 0.028740  | 1.769090  | 6                                                                | -3.612941 | 2.654097  | 0.635335  |
| 6                                                       | -5.976446 | 1.180290  | 0.040022  | 6                                                                | -5.062543 | 1.320269  | -1.565610 |
| 6                                                       | -0.521742 | -3.265131 | 0.901201  | 6                                                                | -4.524697 | -1.751260 | -1.374131 |
| 6                                                       | 0.535685  | 3.692994  | -0.777855 | 6                                                                | -4.713343 | -1.510197 | 1.097282  |
| 1                                                       | -1.766576 | -0.656618 | 0.815188  | 1                                                                | -6.008650 | 1.800518  | -1.303889 |
| 1                                                       | -0.994575 | 1.241990  | -1.709311 | 1                                                                | -5.258365 | 0.695951  | -2.431877 |
| 1                                                       | 4.952949  | -2.609712 | 0.709962  | 1                                                                | 4.776662  | -3.263936 | -0.103773 |
| 1                                                       | 6.510074  | -0.747386 | 0.174387  | 1                                                                | 6.453217  | -1.679084 | -1.024901 |
| 1                                                       | 5.553777  | 1.466786  | -0.429028 | 1                                                                | 5.780182  | 0.678306  | -1.424260 |
| 1                                                       | 2.070824  | -2.452696 | 1.858403  | 1                                                                | 2.341344  | -2.638893 | 1.707024  |
| 1                                                       | 2.688847  | -3.490064 | 0.585345  | 1                                                                | 2.399919  | -3.727684 | 0.334587  |
| 1                                                       | 2.802367  | 2.114530  | -1.730334 | 1                                                                | 2.972691  | 1.806364  | -2.073997 |
| 1                                                       | 3.616541  | 2.931517  | -0.407476 | 1                                                                | 4.153035  | 2.459600  | -0.955009 |

|                                                         |           |           |           |                                                         |           |           |           |
|---------------------------------------------------------|-----------|-----------|-----------|---------------------------------------------------------|-----------|-----------|-----------|
| 1                                                       | -1.367288 | 1.114593  | 1.051767  | 1                                                       | -0.863702 | 2.045348  | 0.729927  |
| 1                                                       | -1.410455 | -0.523789 | -1.776317 | 1                                                       | -3.678873 | 0.639253  | 1.496434  |
| 1                                                       | -2.161336 | 2.781131  | -0.653521 | 1                                                       | -4.384613 | 2.118435  | -1.850833 |
| 1                                                       | -3.745326 | 2.469325  | -1.333385 | 1                                                       | -2.114427 | -0.616975 | -0.014466 |
| 1                                                       | -3.525973 | 2.502084  | 0.412720  | 1                                                       | -5.098134 | -2.526849 | 1.130348  |
| 1                                                       | 0.996999  | -4.118653 | -1.573372 | 1                                                       | -3.636754 | -1.567634 | 1.258254  |
| 1                                                       | -0.143461 | -2.940817 | -2.227313 | 1                                                       | -5.151308 | -0.971936 | 1.935529  |
| 1                                                       | 1.584541  | -2.589290 | -2.253772 | 1                                                       | -6.997848 | -1.853182 | -0.193966 |
| 1                                                       | 2.086114  | 3.863365  | 1.791593  | 1                                                       | -7.050578 | -0.204413 | 0.412798  |
| 1                                                       | 0.617949  | 3.027453  | 2.311146  | 1                                                       | -6.952750 | -0.511844 | -1.322539 |
| 1                                                       | 2.164674  | 2.184569  | 2.360370  | 6                                                       | -0.506055 | -3.024993 | 1.453683  |
| 1                                                       | -4.346631 | -2.304872 | -1.205996 | 6                                                       | 1.121271  | 3.625617  | -0.801100 |
| 1                                                       | -2.692136 | -1.865180 | -1.450052 | 1                                                       | -0.816727 | 0.580124  | -2.022784 |
| 1                                                       | -3.315540 | -2.120188 | 0.188310  | 1                                                       | -2.558961 | 0.455362  | -2.179645 |
| 1                                                       | -4.397839 | 0.019067  | -1.676913 | 1                                                       | -1.817400 | 1.968837  | -1.640418 |
| 1                                                       | -6.938560 | -1.052026 | 0.912544  | 1                                                       | -2.892596 | 2.917922  | 1.404548  |
| 1                                                       | -6.464458 | -1.392378 | -0.738959 | 1                                                       | -3.286634 | 3.096686  | -0.303186 |
| 1                                                       | -5.636118 | -2.175754 | 0.610627  | 1                                                       | -4.549694 | 3.142594  | 0.903580  |
| 1                                                       | -3.953618 | 0.907411  | 1.932150  | 1                                                       | -1.981736 | 1.144583  | 2.736949  |
| 1                                                       | -5.400787 | 0.088794  | 2.476832  | 1                                                       | -1.408614 | -0.480425 | 2.390061  |
| 1                                                       | -3.996967 | -0.855705 | 2.036709  | 1                                                       | -0.282396 | 0.770079  | 2.888950  |
| 1                                                       | -5.471916 | 2.126529  | 0.194669  | 1                                                       | 0.187369  | -3.978862 | -1.312974 |
| 1                                                       | -6.345612 | 1.156747  | -0.984893 | 1                                                       | -0.891953 | -2.624132 | -1.661316 |
| 1                                                       | -6.847189 | 1.185028  | 0.692415  | 1                                                       | 0.805214  | -2.527604 | -2.122750 |
| 1                                                       | -0.146629 | -4.282979 | 0.996055  | 1                                                       | 3.217387  | 3.761528  | 1.360896  |
| 1                                                       | -0.660752 | -2.846422 | 1.894676  | 1                                                       | 1.808323  | 3.156638  | 2.242183  |
| 1                                                       | -1.480655 | -3.303440 | 0.393103  | 1                                                       | 3.223745  | 2.125269  | 2.045997  |
| 1                                                       | -0.379336 | 4.004305  | -0.281841 | 1                                                       | -4.948236 | -2.750409 | -1.296434 |
| 1                                                       | 1.220498  | 4.539865  | -0.779246 | 1                                                       | -4.778860 | -1.371301 | -2.360276 |
| 1                                                       | 0.312704  | 3.425039  | -1.807203 | 1                                                       | -3.440500 | -1.852601 | -1.319725 |
| NImag = 1 (-45.3083 cm <sup>-1</sup> )                  |           |           |           | 1                                                       | -0.323964 | -4.096395 | 1.388989  |
|                                                         |           |           |           | 1                                                       | -0.276147 | -2.687376 | 2.460622  |
|                                                         |           |           |           | 1                                                       | -1.560301 | -2.848080 | 1.257564  |
|                                                         |           |           |           | 1                                                       | 0.309910  | 4.011991  | -0.189173 |
|                                                         |           |           |           | 1                                                       | 1.843016  | 4.426582  | -0.950749 |
|                                                         |           |           |           | 1                                                       | 0.722275  | 3.323172  | -1.765490 |
|                                                         |           |           |           | NImag = 1 (-282.7654 cm <sup>-1</sup> )                 |           |           |           |
| <b>TS4(c-d)</b><br>Et = -1758.3936<br>Gsol = -1758.8215 |           |           |           | <b>TS4(d-e)</b><br>Et = -1758.3879<br>Gsol = -1758.8222 |           |           |           |
| 6                                                       | 5.145228  | 0.011503  | -0.864056 | 6                                                       | 5.148357  | 0.430515  | 0.702386  |
| 6                                                       | 3.838020  | 0.393364  | -0.618561 | 6                                                       | 3.889927  | -0.104660 | 0.492411  |



|    |           |           |           |    |           |           |           |
|----|-----------|-----------|-----------|----|-----------|-----------|-----------|
| 7  | 2.922806  | -0.492662 | -0.186978 | 7  | 2.851005  | 0.675100  | 0.138249  |
| 6  | 3.271572  | -1.775927 | 0.006787  | 6  | 3.029763  | 1.999467  | -0.014077 |
| 6  | 4.557766  | -2.217288 | -0.250686 | 6  | 4.261191  | 2.588506  | 0.211775  |
| 6  | 5.507744  | -1.311500 | -0.686260 | 6  | 5.335217  | 1.794547  | 0.570375  |
| 6  | 3.386621  | 1.800514  | -0.867156 | 6  | 3.634669  | -1.567535 | 0.692441  |
| 15 | 1.917811  | 2.213697  | 0.150078  | 15 | 2.182796  | -2.117052 | -0.280803 |
| 6  | 1.193272  | 3.677888  | -0.634774 | 6  | 2.793800  | -2.488013 | -1.947481 |
| 78 | 0.896656  | 0.151138  | 0.189730  | 6  | -1.873596 | -1.125914 | 0.708438  |
| 15 | 0.528494  | -2.140586 | 0.174157  | 6  | -3.282383 | -0.934519 | 0.767935  |
| 6  | -0.482695 | -3.060541 | 1.368049  | 6  | -4.133207 | -0.460916 | -0.375858 |
| 6  | 2.234569  | -2.698138 | 0.566077  | 6  | -4.854790 | -1.710783 | -0.898340 |
| 6  | -1.007728 | 0.893414  | 0.593495  | 6  | 1.867691  | 2.807046  | -0.498378 |
| 6  | -2.082897 | 0.465096  | -0.424158 | 15 | 0.257947  | 2.034011  | -0.069934 |
| 6  | -3.406916 | 1.194692  | -0.247265 | 6  | -0.182540 | 2.721919  | 1.553054  |
| 6  | -4.686524 | 0.600793  | -0.122106 | 6  | -0.930811 | -1.142561 | -0.481591 |
| 6  | -5.886172 | 1.504673  | -0.135109 | 6  | -0.890108 | 2.794779  | -1.250736 |
| 6  | -1.407334 | 0.573661  | 2.026401  | 6  | 1.701055  | -3.716612 | 0.421214  |
| 6  | 0.145021  | -2.888989 | -1.437120 | 6  | -3.985730 | -1.313231 | 2.037387  |
| 6  | 2.552004  | 2.790348  | 1.748526  | 6  | -5.083645 | 0.758766  | -0.103506 |
| 6  | -1.662306 | 0.733772  | -1.873956 | 6  | -4.411065 | 1.758541  | 0.832854  |
| 6  | -3.322217 | 2.697795  | -0.340223 | 6  | -6.464303 | 0.403817  | 0.448788  |
| 6  | -4.977436 | -0.920622 | -0.155700 | 6  | -5.294870 | 1.437653  | -1.459758 |
| 6  | -6.476951 | -1.207123 | -0.018742 | 1  | -2.287616 | 0.017103  | 1.005303  |
| 6  | -4.298607 | -1.649545 | 1.007064  | 1  | 4.376560  | 3.653800  | 0.089267  |
| 6  | -4.537495 | -1.476643 | -1.515383 | 1  | 6.306898  | 2.232710  | 0.741121  |
| 1  | -3.974082 | 0.869528  | 0.919316  | 1  | 5.965707  | -0.216182 | 0.979726  |
| 1  | 4.811450  | -3.253724 | -0.093686 | 1  | 1.906978  | 2.852823  | -1.589068 |
| 1  | 6.519690  | -1.632158 | -0.882309 | 1  | 1.925076  | 3.832793  | -0.138150 |
| 1  | 5.862955  | 0.741501  | -1.203449 | 1  | 3.395649  | -1.746623 | 1.743026  |
| 1  | 2.316410  | -2.695348 | 1.655411  | 1  | 4.523605  | -2.153053 | 0.464218  |
| 1  | 2.403873  | -3.722891 | 0.239420  | 1  | -5.454846 | -1.446879 | -1.764815 |
| 1  | 3.080089  | 1.894696  | -1.911211 | 1  | -5.518898 | -2.149025 | -0.158226 |
| 1  | 4.201544  | 2.505106  | -0.710190 | 1  | -4.148121 | -2.476152 | -1.212545 |
| 1  | -6.337750 | 1.425107  | -1.124717 | 1  | -0.681880 | -2.208385 | -0.469424 |
| 1  | -5.660262 | 2.547090  | 0.037345  | 1  | -3.465664 | -0.126203 | -1.158745 |
| 1  | -6.634535 | 1.188452  | 0.581271  | 1  | 1.969837  | -2.813348 | -2.577842 |
| 1  | -0.922680 | 1.977804  | 0.522210  | 1  | 3.229071  | -1.595550 | -2.389262 |
| 1  | -2.247635 | -0.601959 | -0.319652 | 1  | 3.543826  | -3.275945 | -1.916020 |
| 1  | 1.721275  | 3.038658  | 2.404486  | 1  | -0.230706 | 3.808301  | 1.511305  |
| 1  | 3.132536  | 2.001986  | 2.220424  | 1  | -1.150849 | 2.347182  | 1.875041  |
| 1  | 3.177814  | 3.671698  | 1.622576  | 1  | 0.559345  | 2.424791  | 2.289896  |
| 1  | 0.232042  | -3.972826 | -1.391657 | 1  | -5.048602 | -1.144674 | 1.950322  |
| 1  | -0.868194 | -2.633473 | -1.737459 | 1  | -3.816937 | -2.369018 | 2.243603  |
| 1  | 0.828906  | -2.507400 | -2.191084 | 1  | -3.630689 | -0.758627 | 2.902017  |
| 1  | -2.333564 | 1.074296  | 2.332734  | 1  | -5.950021 | 2.299253  | -1.351316 |
| 1  | -1.546650 | -0.493137 | 2.190408  | 1  | -4.355789 | 1.789978  | -1.887195 |

|                                                         |           |           |           |                                                         |           |           |           |
|---------------------------------------------------------|-----------|-----------|-----------|---------------------------------------------------------|-----------|-----------|-----------|
| 1                                                       | -0.645889 | 0.904480  | 2.728966  | 1                                                       | -5.760615 | 0.770060  | -2.181949 |
| 1                                                       | -2.437843 | 0.469552  | -2.590438 | 1                                                       | -4.999613 | 2.671287  | 0.896670  |
| 1                                                       | -1.400278 | 1.777019  | -2.031812 | 1                                                       | -4.312742 | 1.379263  | 1.850112  |
| 1                                                       | -0.776848 | 0.141721  | -2.091927 | 1                                                       | -3.422502 | 2.049069  | 0.470891  |
| 1                                                       | -3.740407 | 3.197596  | 0.529111  | 1                                                       | -7.072542 | 1.305698  | 0.478326  |
| 1                                                       | -2.293422 | 3.017183  | -0.431999 | 1                                                       | -6.988988 | -0.307936 | -0.183190 |
| 1                                                       | -3.867383 | 3.044336  | -1.215850 | 1                                                       | -6.451033 | 0.015370  | 1.463900  |
| 1                                                       | -4.839467 | -2.519220 | -1.584853 | 1                                                       | -0.848948 | 3.879613  | -1.169900 |
| 1                                                       | -5.022736 | -0.947321 | -2.333995 | 1                                                       | -0.624473 | 2.504646  | -2.263969 |
| 1                                                       | -3.464919 | -1.432513 | -1.673966 | 1                                                       | -1.910309 | 2.476809  | -1.057318 |
| 1                                                       | -6.618692 | -2.283134 | -0.081395 | 1                                                       | 0.867154  | -4.133465 | -0.138664 |
| 1                                                       | -6.881108 | -0.892410 | 0.940565  | 1                                                       | 2.531321  | -4.417823 | 0.361772  |
| 1                                                       | -7.070238 | -0.763685 | -0.813806 | 1                                                       | 1.406617  | -3.606993 | 1.461165  |
| 1                                                       | -4.523953 | -2.711386 | 0.939322  | 78                                                      | 0.910632  | -0.192104 | -0.147763 |
| 1                                                       | -3.220336 | -1.537577 | 1.019979  | 6                                                       | -1.230097 | -1.726863 | 1.939721  |
| 1                                                       | -4.682476 | -1.299779 | 1.964782  | 6                                                       | -1.417842 | -0.844918 | -1.890618 |
| 1                                                       | -1.538353 | -2.942573 | 1.142879  | 1                                                       | -1.678394 | 0.198350  | -2.050300 |
| 1                                                       | -0.242197 | -4.121293 | 1.321592  | 1                                                       | -0.608353 | -1.064158 | -2.583536 |
| 1                                                       | -0.297715 | -2.699583 | 2.376203  | 1                                                       | -2.261590 | -1.462607 | -2.196420 |
| 1                                                       | 0.365926  | 4.048921  | -0.034695 | 1                                                       | -1.594940 | -1.315165 | 2.873798  |
| 1                                                       | 1.934049  | 4.471193  | -0.715177 | 1                                                       | -1.431921 | -2.797855 | 1.955073  |
| 1                                                       | 0.828425  | 3.431519  | -1.628181 | 1                                                       | -0.157665 | -1.573361 | 1.899474  |
| NImag = 1 (-287.4553 cm <sup>-1</sup> )                 |           |           |           | NImag = 1 (-479.3162 cm <sup>-1</sup> )                 |           |           |           |
| <b>TS4(c-e)</b><br>Et = -1758.3783<br>Gsol = -1758.8194 |           |           |           | <b>TS4(d-g)</b><br>Et = -1758.3916<br>Gsol = -1758.8418 |           |           |           |
| 6                                                       | 3.764340  | 0.266562  | -0.591108 | 6                                                       | 5.051648  | -0.804380 | 0.269532  |
| 7                                                       | 2.794094  | -0.579956 | -0.199339 | 6                                                       | 5.646717  | 0.350395  | -0.203818 |
| 6                                                       | 3.061337  | -1.891767 | -0.074537 | 6                                                       | 4.844361  | 1.406319  | -0.597000 |
| 6                                                       | 4.315092  | -2.400694 | -0.363867 | 6                                                       | 3.470020  | 1.281928  | -0.525900 |
| 6                                                       | 5.320059  | -1.536840 | -0.759630 | 7                                                       | 2.898192  | 0.147073  | -0.065430 |
| 6                                                       | 5.042710  | -0.185958 | -0.865666 | 6                                                       | 3.673317  | -0.881630 | 0.342711  |
| 78                                                      | 0.814451  | 0.165816  | 0.194829  | 6                                                       | 2.567750  | 2.386888  | -0.969187 |
| 6                                                       | -1.039455 | 1.020591  | 0.614919  | 15                                                      | 1.016427  | 2.333872  | -0.001457 |
| 6                                                       | -1.384058 | 0.828371  | 2.079778  | 6                                                       | 1.370101  | 3.097955  | 1.602235  |
| 6                                                       | 1.970944  | -2.773983 | 0.444705  | 78                                                      | 0.844801  | -0.000881 | 0.054967  |
| 15                                                      | 0.302058  | -2.094735 | 0.088389  | 15                                                      | 1.358323  | -2.280620 | 0.090669  |
| 6                                                       | -0.754473 | -2.978954 | 1.268220  | 6                                                       | 1.752645  | -3.032764 | -1.512517 |
| 6                                                       | 3.407713  | 1.711626  | -0.761634 | 6                                                       | 2.989529  | -2.085517 | 0.901773  |
| 15                                                      | 1.974494  | 2.161379  | 0.287548  | 6                                                       | -1.408741 | -0.294427 | 0.520763  |
| 6                                                       | 1.359246  | 3.729583  | -0.381145 | 6                                                       | -2.830595 | 0.000281  | -0.293370 |
| 6                                                       | -0.142704 | -2.759655 | -1.543521 | 6                                                       | -2.676315 | 0.857017  | -1.523030 |

|   |           |           |           |   |           |           |           |
|---|-----------|-----------|-----------|---|-----------|-----------|-----------|
| 6 | 2.648319  | 2.567330  | 1.921523  | 6 | -2.177867 | -1.308178 | -0.316065 |
| 6 | -2.123467 | 0.957327  | -0.466042 | 6 | -1.691357 | -1.941120 | -1.591732 |
| 6 | -1.521968 | 1.163738  | -1.836548 | 6 | -1.390775 | -0.367864 | 2.028164  |
| 6 | -3.499408 | 1.527440  | -0.220148 | 6 | -4.041684 | 0.250917  | 0.593955  |
| 6 | -3.980335 | 2.741554  | -0.978952 | 6 | -3.987544 | 1.640719  | 1.217488  |
| 6 | -3.876516 | 0.127327  | -0.639061 | 6 | -5.420672 | -0.067814 | -0.081239 |
| 6 | -4.653635 | -0.793963 | 0.329871  | 6 | -5.946210 | 1.064235  | -0.961935 |
| 6 | -4.138187 | -0.816601 | 1.758881  | 6 | -5.341440 | -1.352234 | -0.902382 |
| 6 | -4.230491 | -0.101207 | -2.094386 | 6 | -6.434875 | -0.300855 | 1.042250  |
| 6 | -4.684431 | -2.227771 | -0.197176 | 1 | 5.647741  | -1.641427 | 0.596550  |
| 6 | -6.079919 | -0.217139 | 0.369740  | 1 | 6.721904  | 0.428898  | -0.261060 |
| 1 | -3.670893 | 1.660236  | 0.842494  | 1 | 5.276211  | 2.322326  | -0.967647 |
| 1 | 4.501791  | -3.458020 | -0.261972 | 1 | 2.810840  | -1.936988 | 1.968797  |
| 1 | 6.308276  | -1.911320 | -0.979864 | 1 | 3.610273  | -2.972983 | 0.796457  |
| 1 | 5.804605  | 0.513299  | -1.171898 | 1 | 2.296206  | 2.240421  | -2.016875 |
| 1 | 2.054846  | -2.829069 | 1.532497  | 1 | 3.065465  | 3.351764  | -0.894926 |
| 1 | 2.074957  | -3.790416 | 0.068588  | 1 | -1.013785 | 0.635130  | 0.052111  |
| 1 | 3.106314  | 1.884151  | -1.797122 | 1 | -2.643071 | -2.021778 | 0.355354  |
| 1 | 4.267883  | 2.350803  | -0.569992 | 6 | 0.473791  | -3.523101 | 1.063123  |
| 1 | -3.695754 | -0.939401 | -2.531659 | 6 | -0.147519 | 3.436622  | -0.838258 |
| 1 | -4.099655 | 0.771602  | -2.718046 | 1 | -1.201254 | -2.889796 | -1.389914 |
| 1 | -5.286209 | -0.349665 | -2.138535 | 1 | -2.538689 | -2.165801 | -2.236324 |
| 1 | -0.881326 | 2.102509  | 0.503404  | 1 | -1.005642 | -1.307345 | -2.147099 |
| 1 | -2.616833 | -0.289071 | -0.536391 | 1 | -1.664819 | 0.822361  | -1.925813 |
| 1 | 1.841391  | 2.843430  | 2.595677  | 1 | -3.332843 | 0.491982  | -2.309427 |
| 1 | 3.157553  | 1.701498  | 2.336412  | 1 | -2.939664 | 1.892929  | -1.332262 |
| 1 | 3.347987  | 3.398067  | 1.853419  | 1 | -2.378976 | -0.542005 | 2.443962  |
| 1 | -0.132309 | -3.847842 | -1.535390 | 1 | -0.758001 | -1.178624 | 2.381603  |
| 1 | -1.136857 | -2.424343 | -1.828943 | 1 | -1.016064 | 0.553315  | 2.467800  |
| 1 | 0.562725  | -2.401967 | -2.289368 | 1 | 2.229095  | -3.999425 | -1.359756 |
| 1 | -2.283921 | 1.355915  | 2.393247  | 1 | 0.858785  | -3.172761 | -2.110795 |
| 1 | -1.485591 | -0.214605 | 2.360009  | 1 | 2.431708  | -2.384985 | -2.061381 |
| 1 | -0.569154 | 1.229213  | 2.678358  | 1 | 1.677638  | 4.133348  | 1.467424  |
| 1 | -2.212806 | 1.084715  | -2.662503 | 1 | 0.478972  | 3.077686  | 2.224758  |
| 1 | -1.123327 | 2.176870  | -1.849392 | 1 | 2.158657  | 2.552704  | 2.114153  |
| 1 | -0.691301 | 0.481468  | -1.991642 | 1 | -4.817727 | 1.797460  | 1.899534  |
| 1 | -5.058271 | 2.844330  | -0.881391 | 1 | -3.073546 | 1.777559  | 1.793529  |
| 1 | -3.533747 | 3.638160  | -0.555664 | 1 | -4.036572 | 2.429839  | 0.470946  |
| 1 | -3.739856 | 2.724014  | -2.037070 | 1 | -3.980980 | -0.479891 | 1.400778  |
| 1 | -5.210917 | -2.862633 | 0.511104  | 1 | -7.408732 | -0.538047 | 0.618536  |
| 1 | -5.198096 | -2.321896 | -1.149390 | 1 | -6.143028 | -1.135915 | 1.678739  |
| 1 | -3.680170 | -2.636331 | -0.315627 | 1 | -6.567248 | 0.575952  | 1.672074  |
| 1 | -6.673743 | -0.823620 | 1.049970  | 1 | -5.291171 | 1.301267  | -1.796494 |
| 1 | -6.092307 | 0.802922  | 0.748533  | 1 | -6.905138 | 0.772713  | -1.386074 |
| 1 | -6.582149 | -0.234623 | -0.593392 | 1 | -6.116440 | 1.976042  | -0.393790 |
| 1 | -4.783674 | -1.463030 | 2.348147  | 1 | -4.701111 | -1.250656 | -1.777485 |

|                                                                  |           |           |           |                                                         |           |           |           |
|------------------------------------------------------------------|-----------|-----------|-----------|---------------------------------------------------------|-----------|-----------|-----------|
| 1                                                                | -3.133479 | -1.221319 | 1.822928  | 1                                                       | -4.983542 | -2.192410 | -0.307078 |
| 1                                                                | -4.153710 | 0.159152  | 2.234437  | 1                                                       | -6.331730 | -1.618522 | -1.265888 |
| 1                                                                | -0.585786 | -4.051571 | 1.189063  | 1                                                       | 1.024937  | -4.461728 | 1.043638  |
| 1                                                                | -0.531838 | -2.660125 | 2.283140  | 1                                                       | 0.373310  | -3.196643 | 2.094389  |
| 1                                                                | -1.802667 | -2.784771 | 1.064109  | 1                                                       | -0.516780 | -3.695830 | 0.653384  |
| 1                                                                | 0.532798  | 4.096331  | 0.223250  | 1                                                       | -1.078771 | 3.485664  | -0.279225 |
| 1                                                                | 2.147467  | 4.479996  | -0.363851 | 1                                                       | 0.272087  | 4.439822  | -0.892054 |
| 1                                                                | 1.019348  | 3.601804  | -1.405324 | 1                                                       | -0.357296 | 3.084416  | -1.844132 |
| NImag = 1 (-638.2308 cm <sup>-1</sup> )                          |           |           |           | NImag = 1 (-393.7308 cm <sup>-1</sup> )                 |           |           |           |
| <b>TS5<sub>add</sub></b><br>Et = -1569.4180<br>Gsol = -1569.8062 |           |           |           | <b>TS5(c-d)</b><br>Et = -1569.4197<br>Gsol = -1569.8010 |           |           |           |
| 7                                                                | 2.324100  | -0.085548 | 0.223577  | 6                                                       | 5.130024  | -0.653710 | -0.378881 |
| 6                                                                | 3.115224  | 0.994114  | 0.078842  | 6                                                       | 4.604128  | 0.614693  | -0.549972 |
| 6                                                                | 4.451318  | 0.951847  | 0.436104  | 6                                                       | 3.240293  | 0.803316  | -0.405362 |
| 6                                                                | 4.984902  | -0.229391 | 0.919776  | 7                                                       | 2.429169  | -0.216430 | -0.079083 |
| 6                                                                | 4.168813  | -1.340076 | 1.042512  | 6                                                       | 2.933120  | -1.446450 | 0.109174  |
| 6                                                                | 2.833269  | -1.239046 | 0.696440  | 6                                                       | 4.284929  | -1.699042 | -0.050368 |
| 6                                                                | 2.516404  | 2.223041  | -0.532758 | 6                                                       | 2.609815  | 2.142579  | -0.646543 |
| 15                                                               | 0.712059  | 2.319795  | -0.211474 | 15                                                      | 1.037177  | 2.319276  | 0.288373  |
| 6                                                                | 0.536548  | 3.101649  | 1.416837  | 6                                                       | 1.510655  | 2.877767  | 1.950092  |
| 6                                                                | 1.897799  | -2.396441 | 0.869665  | 46                                                      | 0.320224  | 0.125414  | 0.143975  |
| 15                                                               | 0.500361  | -2.290225 | -0.314599 | 6                                                       | -1.676552 | 0.525404  | 0.414867  |
| 6                                                                | 1.091495  | -2.988750 | -1.879835 | 1                                                       | -1.909023 | 0.194107  | 1.430366  |
| 46                                                               | 0.286218  | 0.025420  | -0.313056 | 6                                                       | 1.986940  | -2.521172 | 0.551860  |
| 6                                                                | -1.706126 | 0.108894  | -1.090632 | 15                                                      | 0.269162  | -2.203882 | -0.025475 |
| 6                                                                | -2.285894 | 0.226998  | 0.183304  | 6                                                       | 0.207908  | -2.889998 | -1.708323 |
| 1                                                                | -2.408123 | -0.650394 | 0.799753  | 6                                                       | 0.193928  | 3.735572  | -0.469204 |
| 6                                                                | -0.760460 | -3.437293 | 0.299814  | 6                                                       | -0.740477 | -3.334770 | 0.977131  |
| 1                                                                | -1.724190 | 0.980681  | -1.732168 | 6                                                       | -2.634516 | -0.126867 | -0.581911 |
| 6                                                                | 0.060778  | 3.507309  | -1.414784 | 1                                                       | -2.300317 | 0.048805  | -1.603683 |
| 6                                                                | -4.542793 | 0.635004  | -0.338648 | 6                                                       | -4.035742 | 0.461039  | -0.519115 |
| 6                                                                | -4.742112 | 0.108590  | 0.900286  | 6                                                       | -4.254521 | 1.661688  | -1.397903 |
| 6                                                                | -4.655570 | 0.969684  | 2.114093  | 6                                                       | -5.103573 | -0.198016 | 0.121687  |
| 6                                                                | -4.795018 | -0.027028 | -1.646053 | 6                                                       | -4.892746 | -1.455935 | 0.893938  |
| 6                                                                | -5.117061 | -1.312176 | 1.148128  | 6                                                       | -6.508807 | 0.283506  | 0.060138  |
| 1                                                                | -6.176940 | -1.357263 | 1.404691  | 1                                                       | -4.260666 | 0.797333  | 0.653576  |
| 1                                                                | -4.582832 | -1.716100 | 2.007616  | 1                                                       | 4.669008  | -2.695903 | 0.098055  |
| 1                                                                | 5.066332  | 1.830064  | 0.319159  | 1                                                       | 6.189163  | -0.825469 | -0.497883 |
| 1                                                                | 6.027483  | -0.285192 | 1.194437  | 1                                                       | 5.239679  | 1.447561  | -0.806293 |
| 1                                                                | 4.558025  | -2.274356 | 1.415119  | 1                                                       | 1.952039  | -2.529738 | 1.643674  |
| 1                                                                | 2.640564  | 2.174347  | -1.617065 | 1                                                       | 2.336939  | -3.504038 | 0.239648  |
| 1                                                                | 3.032393  | 3.120923  | -0.196459 | 1                                                       | 2.357091  | 2.230470  | -1.705507 |

|                                                         |           |           |           |                                                         |           |           |           |
|---------------------------------------------------------|-----------|-----------|-----------|---------------------------------------------------------|-----------|-----------|-----------|
| 1                                                       | 1.466808  | -2.361481 | 1.872757  | 1                                                       | 3.305549  | 2.948944  | -0.419591 |
| 1                                                       | 2.427688  | -3.343972 | 0.785814  | 1                                                       | -7.076880 | -0.509256 | -0.431580 |
| 1                                                       | -1.870585 | -0.817656 | -1.624463 | 1                                                       | -6.654483 | 1.195946  | -0.501521 |
| 1                                                       | -4.395838 | 1.708639  | -0.385978 | 1                                                       | -6.932037 | 0.385597  | 1.056910  |
| 1                                                       | -4.964244 | -1.960980 | 0.292550  | 1                                                       | -1.825649 | 1.604907  | 0.391206  |
| 1                                                       | -2.266328 | 1.166300  | 0.712981  | 1                                                       | -2.664129 | -1.205189 | -0.449216 |
| 1                                                       | -4.061266 | 0.278099  | -2.390817 | 1                                                       | 0.622402  | 3.004628  | 2.563976  |
| 1                                                       | -4.804614 | -1.111065 | -1.591383 | 1                                                       | 2.146332  | 2.133735  | 2.423026  |
| 1                                                       | -5.766417 | 0.290259  | -2.026410 | 1                                                       | 2.043686  | 3.825534  | 1.903804  |
| 1                                                       | 0.995574  | 4.088692  | 1.417490  | 1                                                       | 0.446817  | -3.951767 | -1.705114 |
| 1                                                       | -0.514871 | 3.211365  | 1.670697  | 1                                                       | -0.784376 | -2.755804 | -2.131715 |
| 1                                                       | 1.011415  | 2.488309  | 2.178291  | 1                                                       | 0.918998  | -2.367952 | -2.343602 |
| 1                                                       | 1.379844  | -4.030248 | -1.749752 | 1                                                       | -5.056886 | 2.314976  | -1.075779 |
| 1                                                       | 0.306355  | -2.934482 | -2.630025 | 1                                                       | -3.341577 | 2.246450  | -1.453797 |
| 1                                                       | 1.947243  | -2.423948 | -2.240396 | 1                                                       | -4.484051 | 1.310622  | -2.403485 |
| 1                                                       | 0.570763  | 4.464544  | -1.321220 | 1                                                       | -1.766109 | -3.337865 | 0.616624  |
| 1                                                       | 0.195288  | 3.132332  | -2.426151 | 1                                                       | -0.358774 | -4.352157 | 0.912737  |
| 1                                                       | -1.000728 | 3.669176  | -1.242710 | 1                                                       | -0.736812 | -3.021370 | 2.017845  |
| 1                                                       | -1.611743 | -3.451230 | -0.376758 | 1                                                       | -0.715863 | 3.960409  | 0.082362  |
| 1                                                       | -0.357475 | -4.446973 | 0.358150  | 1                                                       | 0.829386  | 4.618966  | -0.448868 |
| 1                                                       | -1.099212 | -3.138672 | 1.288335  | 1                                                       | -0.067334 | 3.511579  | -1.500117 |
| 1                                                       | -4.431176 | 2.006457  | 1.878119  | 1                                                       | -3.881171 | -1.573883 | 1.264097  |
| 1                                                       | -5.607053 | 0.948622  | 2.646154  | 1                                                       | -5.591459 | -1.527071 | 1.721913  |
| 1                                                       | -3.912255 | 0.589592  | 2.817712  | 1                                                       | -5.107916 | -2.285667 | 0.217340  |
| NImag = 1 (-182.6768 cm <sup>-1</sup> )                 |           |           |           | NImag = 1 (-205.7161 cm <sup>-1</sup> )                 |           |           |           |
| <b>TS5(c-e)</b><br>Et = -1569.4132<br>Gsol = -1569.8001 |           |           |           | <b>TS5(d-e)</b><br>Et = -1569.4192<br>Gsol = -1569.8070 |           |           |           |
| 6                                                       | 4.855772  | -0.283305 | 1.033362  | 6                                                       | 4.371770  | 0.365129  | -1.112354 |
| 6                                                       | 4.014849  | -1.375023 | 1.159767  | 6                                                       | 3.066726  | 0.635609  | -0.739835 |
| 6                                                       | 2.694390  | -1.257656 | 0.762775  | 7                                                       | 2.273373  | -0.326917 | -0.238121 |
| 7                                                       | 2.223985  | -0.111834 | 0.240731  | 6                                                       | 2.742897  | -1.577865 | -0.087110 |
| 6                                                       | 3.040661  | 0.945654  | 0.089380  | 6                                                       | 4.031407  | -1.909014 | -0.468719 |
| 6                                                       | 4.363061  | 0.891884  | 0.494202  | 6                                                       | 4.855944  | -0.924773 | -0.984331 |
| 6                                                       | 1.728942  | -2.392700 | 0.922994  | 6                                                       | 2.476763  | 2.002386  | -0.911964 |
| 15                                                      | 0.388837  | -2.299209 | -0.330480 | 15                                                      | 1.128792  | 2.299504  | 0.300161  |
| 6                                                       | -0.831737 | -3.530079 | 0.214996  | 6                                                       | 1.946107  | 2.789145  | 1.845292  |
| 46                                                      | 0.184358  | 0.032306  | -0.374610 | 6                                                       | -2.499261 | 1.234797  | 0.034352  |
| 6                                                       | -1.730100 | 0.218560  | -1.114098 | 6                                                       | -3.730713 | 0.832913  | -0.518544 |
| 1                                                       | -1.981565 | 1.240907  | -1.382331 | 6                                                       | -4.316030 | -0.517738 | -0.224681 |
| 6                                                       | 2.484174  | 2.161822  | -0.586732 | 6                                                       | -5.246300 | -0.348157 | 0.985545  |
| 15                                                      | 0.671159  | 2.299682  | -0.330696 | 6                                                       | 1.843861  | -2.584827 | 0.563398  |

|                                         |           |           |           |                                             |           |           |           |
|-----------------------------------------|-----------|-----------|-----------|---------------------------------------------|-----------|-----------|-----------|
| 6                                       | 0.091073  | 3.463164  | -1.593489 | 15                                          | 0.072416  | -2.185726 | 0.288420  |
| 6                                       | 1.095824  | -2.991450 | -1.853198 | 6                                           | -0.351739 | -2.941967 | -1.307866 |
| 6                                       | 0.476122  | 3.155472  | 1.259061  | 6                                           | -1.645877 | 0.535894  | 1.012059  |
| 6                                       | -2.869037 | -0.403813 | -0.397484 | 6                                           | -0.829516 | -3.137781 | 1.540265  |
| 1                                       | -2.786488 | -1.457578 | -0.149147 | 6                                           | 0.295917  | 3.801975  | -0.288794 |
| 6                                       | -4.252586 | 0.097702  | -0.426422 | 6                                           | -4.503592 | 1.794578  | -1.353827 |
| 6                                       | -5.403373 | -0.852324 | -0.643694 | 6                                           | -5.041180 | -1.147088 | -1.405842 |
| 6                                       | -3.763772 | 0.409253  | 0.987643  | 1                                           | -2.482200 | 0.711620  | -1.102184 |
| 6                                       | -3.553145 | 1.878228  | 1.275648  | 1                                           | 4.386427  | -2.919929 | -0.345269 |
| 6                                       | -4.338679 | -0.417913 | 2.116671  | 1                                           | 5.867741  | -1.159468 | -1.278731 |
| 1                                       | -4.350332 | 1.006491  | -1.010952 | 1                                           | 4.993153  | 1.153007  | -1.507775 |
| 1                                       | 4.999555  | 1.753746  | 0.370500  | 1                                           | 2.007013  | -2.555936 | 1.643225  |
| 1                                       | 5.886852  | -0.349683 | 1.346352  | 1                                           | 2.082433  | -3.595360 | 0.235572  |
| 1                                       | 4.373298  | -2.305131 | 1.571669  | 1                                           | 2.031926  | 2.077953  | -1.906700 |
| 1                                       | 2.643658  | 2.070293  | -1.663559 | 1                                           | 3.246666  | 2.770095  | -0.850850 |
| 1                                       | 3.003857  | 3.063322  | -0.266113 | 1                                           | -5.629430 | -1.324007 | 1.272789  |
| 1                                       | 1.254365  | -2.326748 | 1.904487  | 1                                           | -6.102871 | 0.277691  | 0.746359  |
| 1                                       | 2.244447  | -3.351154 | 0.883865  | 1                                           | -4.734209 | 0.079107  | 1.844868  |
| 1                                       | -3.808669 | -0.225480 | 3.045232  | 1                                           | -1.479368 | 1.233109  | 1.832996  |
| 1                                       | -4.314479 | -1.484415 | 1.915443  | 1                                           | -3.501245 | -1.175131 | 0.077264  |
| 1                                       | -5.379232 | -0.131504 | 2.255035  | 1                                           | 1.201095  | 2.984791  | 2.612703  |
| 1                                       | -1.693793 | -0.339641 | -2.056228 | 1                                           | 2.590652  | 1.986978  | 2.195144  |
| 1                                       | -2.630346 | -0.002041 | 0.929364  | 1                                           | 2.542448  | 3.687760  | 1.698613  |
| 1                                       | 0.351862  | -2.982382 | -2.646093 | 1                                           | -0.182834 | -4.016905 | -1.281152 |
| 1                                       | 1.942029  | -2.390328 | -2.175619 | 1                                           | -1.397909 | -2.762901 | -1.542869 |
| 1                                       | 1.426380  | -4.016233 | -1.694580 | 1                                           | 0.256423  | -2.507166 | -2.097005 |
| 1                                       | 0.956458  | 4.131798  | 1.230004  | 1                                           | -5.432768 | 2.009112  | -0.824871 |
| 1                                       | -0.577901 | 3.295217  | 1.483046  | 1                                           | -3.981712 | 2.734086  | -1.505090 |
| 1                                       | 0.921956  | 2.564592  | 2.055105  | 1                                           | -4.780203 | 1.370921  | -2.315100 |
| 1                                       | -6.334758 | -0.411762 | -0.297857 | 1                                           | -0.572439 | -4.193672 | 1.478935  |
| 1                                       | -5.513996 | -1.051807 | -1.706423 | 1                                           | -0.591050 | -2.771417 | 2.535412  |
| 1                                       | -5.268264 | -1.803834 | -0.137075 | 1                                           | -1.901218 | -3.040100 | 1.385304  |
| 1                                       | 0.634647  | 4.403881  | -1.528277 | 1                                           | -0.474205 | 4.103048  | 0.418074  |
| 1                                       | 0.229194  | 3.041255  | -2.585639 | 1                                           | 1.007704  | 4.621295  | -0.374312 |
| 1                                       | -0.966611 | 3.672423  | -1.452597 | 1                                           | -0.156800 | 3.634747  | -1.262878 |
| 1                                       | -1.617481 | -3.635189 | -0.529975 | 46                                          | 0.271859  | 0.126179  | 0.336139  |
| 1                                       | -0.358143 | -4.503058 | 0.335184  | 1                                           | -2.230597 | 2.262706  | -0.185797 |
| 1                                       | -1.273185 | -3.242820 | 1.166100  | 1                                           | -2.121000 | -0.349011 | 1.419215  |
| 1                                       | -3.045540 | 2.384320  | 0.459112  | 1                                           | -5.933559 | -0.589093 | -1.679514 |
| 1                                       | -4.532362 | 2.339133  | 1.390594  | 1                                           | -4.405313 | -1.229966 | -2.286100 |
| 1                                       | -2.998363 | 2.028208  | 2.197639  | 1                                           | -5.363085 | -2.149743 | -1.136821 |
| NImag = 1 (-278.0701 cm <sup>-1</sup> ) |           |           |           | NImag = 1 (-398.0367 cm <sup>-1</sup> )     |           |           |           |
| <b>TS5(d-g)</b><br>Et = -1569.4357      |           |           |           | <b>TS6<sub>add</sub></b><br>Et = -1608.7294 |           |           |           |



| Gsol = -1569.8257 |           |           |           | Gsol = -1609.1240 |           |           |           |
|-------------------|-----------|-----------|-----------|-------------------|-----------|-----------|-----------|
| 6                 | 4.462474  | 0.566884  | -0.593421 | 7                 | 2.479607  | 0.013283  | 0.197508  |
| 6                 | 3.099457  | 0.763081  | -0.462705 | 6                 | 3.188191  | 1.150419  | 0.064850  |
| 7                 | 2.287533  | -0.238620 | -0.069820 | 6                 | 4.528855  | 1.198466  | 0.403660  |
| 6                 | 2.800243  | -1.454639 | 0.203229  | 6                 | 5.153707  | 0.049961  | 0.855877  |
| 6                 | 4.153401  | -1.705783 | 0.062766  | 6                 | 4.422112  | -1.119180 | 0.966814  |
| 6                 | 4.995297  | -0.683532 | -0.336585 | 6                 | 3.077735  | -1.108979 | 0.640629  |
| 6                 | 2.475299  | 2.085070  | -0.783425 | 6                 | 2.493024  | 2.344824  | -0.512369 |
| 15                | 0.932864  | 2.315052  | 0.179203  | 15                | 0.692656  | 2.304560  | -0.158654 |
| 6                 | 1.427371  | 2.901511  | 1.822001  | 6                 | 0.492353  | 3.039895  | 1.488326  |
| 46                | 0.230863  | 0.093312  | 0.114985  | 6                 | 2.231346  | -2.334244 | 0.804818  |
| 15                | 0.169575  | -2.246073 | 0.074996  | 15                | 0.809405  | -2.305871 | -0.354366 |
| 6                 | 0.118256  | -3.020429 | -1.565030 | 6                 | 1.422141  | -2.932127 | -1.941798 |
| 6                 | 1.868463  | -2.508923 | 0.711410  | 46                | 0.429360  | -0.011763 | -0.300848 |
| 6                 | -1.887732 | 0.458688  | 0.409151  | 6                 | -1.586546 | -0.061513 | -1.031131 |
| 6                 | -3.500042 | 0.638661  | -0.313469 | 6                 | -2.106059 | -0.023689 | 0.269508  |
| 6                 | -4.083986 | 1.980394  | -0.009048 | 1                 | -2.135052 | -0.923555 | 0.864055  |
| 6                 | -2.323125 | 0.534008  | -1.102817 | 6                 | -0.361647 | -3.546456 | 0.255588  |
| 6                 | -4.363959 | -0.584320 | -0.110042 | 1                 | -1.691538 | 0.825589  | -1.643094 |
| 6                 | -5.419183 | -0.624554 | -1.218350 | 6                 | -0.067669 | 3.463786  | -1.324522 |
| 6                 | -5.008130 | -0.661991 | 1.265594  | 6                 | -4.497481 | 0.319706  | -0.237874 |
| 6                 | -0.908230 | -3.242958 | 1.137388  | 6                 | -4.471499 | -0.337892 | 0.960193  |
| 6                 | 0.060468  | 3.697223  | -0.602807 | 6                 | -4.438567 | 0.353157  | 2.285457  |
| 1                 | -2.112447 | -0.423374 | 0.989906  | 6                 | -4.722776 | -0.370009 | -1.543064 |
| 1                 | -1.953977 | 1.418208  | -1.601961 | 6                 | -4.637182 | -1.822281 | 1.082084  |
| 1                 | 4.540529  | -2.688587 | 0.280430  | 1                 | -5.686998 | -2.054482 | 1.267491  |
| 1                 | 6.055280  | -0.858445 | -0.443060 | 1                 | -4.086706 | -2.203043 | 1.941373  |
| 1                 | 5.093152  | 1.384308  | -0.905205 | 1                 | 5.076877  | 2.121255  | 0.297120  |
| 1                 | 1.812039  | -2.437731 | 1.800120  | 1                 | 6.201459  | 0.064885  | 1.115742  |
| 1                 | 2.238471  | -3.505938 | 0.478135  | 1                 | 4.883165  | -2.029644 | 1.315636  |
| 1                 | 2.197925  | 2.105991  | -1.839767 | 1                 | 2.602502  | 2.326555  | -1.599176 |
| 1                 | 3.179056  | 2.900183  | -0.623155 | 1                 | 2.949001  | 3.270646  | -0.165268 |
| 1                 | -1.866747 | 1.372005  | 0.982524  | 1                 | 1.817170  | -2.350975 | 1.815421  |
| 1                 | -2.153805 | -0.383069 | -1.648615 | 1                 | 2.826252  | -3.239183 | 0.691620  |
| 1                 | -3.385550 | 2.786650  | -0.213853 | 1                 | -1.691944 | -0.984844 | -1.584998 |
| 1                 | -4.950009 | 2.128322  | -0.654090 | 1                 | -4.336307 | -2.378875 | 0.201383  |
| 1                 | -4.427752 | 2.056341  | 1.018580  | 1                 | -2.156069 | 0.905021  | 0.815895  |
| 1                 | 0.347025  | -4.082219 | -1.492196 | 1                 | -3.996542 | -0.037273 | -2.286091 |
| 1                 | -0.871298 | -2.911584 | -2.002175 | 1                 | -4.698633 | -1.451411 | -1.492553 |
| 1                 | 0.839407  | -2.545896 | -2.225601 | 1                 | -5.700961 | -0.083325 | -1.931070 |
| 1                 | 1.959206  | 3.848221  | 1.746092  | 1                 | 0.878125  | 4.057700  | 1.500180  |
| 1                 | 0.548098  | 3.044571  | 2.445496  | 1                 | -0.559164 | 3.067106  | 1.762730  |
| 1                 | 2.070223  | 2.168436  | 2.302227  | 1                 | 1.025102  | 2.448841  | 2.228806  |
| 1                 | -4.977776 | -0.556160 | -2.210703 | 1                 | 1.788844  | -3.951385 | -1.834810 |
| 1                 | -5.964331 | -1.563469 | -1.160418 | 1                 | 0.621887  | -2.924175 | -2.677787 |

|                                         |           |           |           |                                         |           |           |           |
|-----------------------------------------|-----------|-----------|-----------|-----------------------------------------|-----------|-----------|-----------|
| 1                                       | -6.146808 | 0.176454  | -1.109478 | 1                                       | 2.227414  | -2.299775 | -2.306479 |
| 1                                       | -3.719518 | -1.456651 | -0.247638 | 1                                       | 0.373033  | 4.453909  | -1.221656 |
| 1                                       | -0.585420 | -4.282743 | 1.134715  | 1                                       | 0.071647  | 3.118445  | -2.345685 |
| 1                                       | -0.886319 | -2.869824 | 2.158123  | 1                                       | -1.134022 | 3.544234  | -1.126815 |
| 1                                       | -1.932032 | -3.205498 | 0.773395  | 1                                       | -1.219524 | -3.604506 | -0.410329 |
| 1                                       | -0.848343 | 3.924813  | -0.051086 | 1                                       | 0.107770  | -4.528131 | 0.290188  |
| 1                                       | 0.687702  | 4.587259  | -0.601038 | 1                                       | -0.707063 | -3.288377 | 1.253326  |
| 1                                       | -0.198923 | 3.456696  | -1.630390 | 1                                       | -4.369340 | 1.432820  | 2.232992  |
| 1                                       | -4.277011 | -0.601303 | 2.070831  | 1                                       | -5.350752 | 0.113770  | 2.833262  |
| 1                                       | -5.737724 | 0.131532  | 1.412013  | 1                                       | -3.617857 | -0.022937 | 2.899285  |
| 1                                       | -5.539372 | -1.604514 | 1.371276  | 6                                       | -4.510673 | 1.811965  | -0.365434 |
| NImag = 1 (-125.7354 cm <sup>-1</sup> ) |           |           |           | 1                                       | -5.525278 | 2.147532  | -0.582948 |
|                                         |           |           |           | 1                                       | -4.179036 | 2.345029  | 0.518469  |
|                                         |           |           |           | 1                                       | -3.902388 | 2.125477  | -1.214140 |
|                                         |           |           |           | NImag = 1 (-131.5969 cm <sup>-1</sup> ) |           |           |           |
| <b>TS6(c-d)</b>                         |           |           |           | <b>TS6(c-e)</b>                         |           |           |           |
| Et = -1608.7301                         |           |           |           | Et = -1608.7211                         |           |           |           |
| Gsol = -1609.1157                       |           |           |           | Gsol = -1609.1130                       |           |           |           |
| 6                                       | 5.237676  | -0.051379 | 0.945581  | 6                                       | -5.046386 | 0.080478  | 0.938852  |
| 6                                       | 4.467491  | -1.193833 | 1.073840  | 6                                       | -4.268894 | 1.218264  | 1.064803  |
| 6                                       | 3.128889  | -1.145761 | 0.724049  | 6                                       | -2.934500 | 1.165905  | 0.702015  |
| 7                                       | 2.576975  | -0.020083 | 0.242845  | 7                                       | -2.389911 | 0.038246  | 0.213590  |
| 6                                       | 3.321865  | 1.087034  | 0.092545  | 6                                       | -3.144466 | -1.064253 | 0.062299  |
| 6                                       | 4.658514  | 1.104770  | 0.453176  | 6                                       | -4.477721 | -1.075384 | 0.433761  |
| 6                                       | 2.234060  | -2.335987 | 0.904493  | 6                                       | -2.036508 | 2.354899  | 0.862945  |
| 15                                      | 0.812198  | -2.293054 | -0.261749 | 15                                      | -0.662392 | 2.310203  | -0.355674 |
| 6                                       | 1.437743  | -2.997957 | -1.814726 | 6                                       | 0.480807  | 3.611231  | 0.194711  |
| 46                                      | 0.498078  | 0.010904  | -0.302049 | 46                                      | -0.329505 | -0.006768 | -0.349157 |
| 6                                       | -1.468804 | 0.030248  | -0.905730 | 6                                       | 1.612296  | -0.088734 | -1.039085 |
| 1                                       | -1.667762 | 0.989475  | -1.387285 | 1                                       | 1.910143  | -1.089120 | -1.334056 |
| 6                                       | 2.670843  | 2.283054  | -0.535588 | 6                                       | -2.506323 | -2.259425 | -0.577730 |
| 15                                      | 0.852852  | 2.303087  | -0.255669 | 15                                      | -0.695260 | -2.296171 | -0.274192 |
| 6                                       | 0.630658  | 3.146458  | 1.339437  | 6                                       | -0.027495 | -3.452841 | -1.499691 |
| 6                                       | -0.344412 | -3.537479 | 0.381401  | 6                                       | -1.365377 | 2.936694  | -1.908405 |
| 6                                       | 0.209872  | 3.458620  | -1.498547 | 6                                       | -0.501390 | -3.113709 | 1.335904  |
| 6                                       | -2.453616 | -0.217022 | 0.225969  | 6                                       | 2.687460  | 0.570857  | -0.263317 |
| 1                                       | -2.275722 | -1.198763 | 0.671930  | 1                                       | 2.503539  | 1.598659  | 0.034179  |
| 6                                       | -3.931615 | -0.239008 | -0.150877 | 6                                       | 4.118910  | 0.202913  | -0.238693 |
| 6                                       | -4.241052 | -0.930930 | -1.445923 | 6                                       | 5.098645  | 1.362238  | -0.232235 |
| 6                                       | -4.924670 | -0.006632 | 0.819852  | 6                                       | 3.563076  | -0.235870 | 1.140806  |
| 6                                       | -4.586588 | 0.308421  | 2.248642  | 6                                       | 3.437191  | -1.726961 | 1.373143  |
| 6                                       | -6.361984 | -0.394668 | 0.640012  | 6                                       | 4.016864  | 0.558473  | 2.350324  |



|                                                         |           |           |           |                                                         |           |           |           |
|---------------------------------------------------------|-----------|-----------|-----------|---------------------------------------------------------|-----------|-----------|-----------|
| 1                                                       | 5.238315  | 2.006138  | 0.332047  | 1                                                       | -5.063666 | -1.972483 | 0.310779  |
| 1                                                       | 6.280983  | -0.063205 | 1.222768  | 1                                                       | -6.087093 | 0.096311  | 1.225515  |
| 1                                                       | 4.893700  | -2.109271 | 1.452798  | 1                                                       | -4.686972 | 2.134740  | 1.450198  |
| 1                                                       | 2.817850  | 2.232579  | -1.616882 | 1                                                       | -2.643283 | -2.194746 | -1.659598 |
| 1                                                       | 3.138266  | 3.206748  | -0.197728 | 1                                                       | -2.984734 | -3.182396 | -0.253904 |
| 1                                                       | 1.814402  | -2.314998 | 1.912692  | 1                                                       | -1.583761 | 2.333550  | 1.856636  |
| 1                                                       | 2.797478  | -3.263778 | 0.816371  | 1                                                       | -2.601726 | 3.283012  | 0.791988  |
| 1                                                       | -6.515604 | -1.324192 | 1.188818  | 1                                                       | 3.461425  | 0.255872  | 3.233617  |
| 1                                                       | -6.666913 | -0.558556 | -0.384966 | 1                                                       | 3.907651  | 1.630309  | 2.224819  |
| 1                                                       | -7.015779 | 0.349444  | 1.087022  | 1                                                       | 5.070051  | 0.350450  | 2.526951  |
| 1                                                       | -1.557721 | -0.730859 | -1.678116 | 1                                                       | 1.577787  | 0.500436  | -1.962379 |
| 1                                                       | -2.288334 | 0.497641  | 1.026752  | 1                                                       | 2.418049  | 0.090832  | 1.053499  |
| 1                                                       | 0.647198  | -3.009039 | -2.561035 | 1                                                       | -0.601959 | 2.952451  | -2.682481 |
| 1                                                       | 2.251940  | -2.386365 | -2.194730 | 1                                                       | -2.170801 | 2.286433  | -2.239824 |
| 1                                                       | 1.794841  | -4.015144 | -1.665473 | 1                                                       | -1.752297 | 3.945508  | -1.777434 |
| 1                                                       | 1.058730  | 4.146793  | 1.313157  | 1                                                       | -0.933405 | -4.112509 | 1.312686  |
| 1                                                       | -0.427582 | 3.228638  | 1.573874  | 1                                                       | 0.551458  | -3.198293 | 1.590553  |
| 1                                                       | 1.111722  | 2.574983  | 2.129099  | 1                                                       | -0.996477 | -2.531041 | 2.108575  |
| 1                                                       | -5.291560 | -0.939243 | -1.704755 | 1                                                       | 6.050338  | 1.058613  | 0.196945  |
| 1                                                       | -3.685107 | -0.486495 | -2.265386 | 1                                                       | 5.291603  | 1.673530  | -1.256097 |
| 1                                                       | -3.913771 | -1.966028 | -1.352387 | 1                                                       | 4.741920  | 2.230087  | 0.314321  |
| 1                                                       | -0.855545 | 3.612689  | -1.345995 | 1                                                       | -0.528804 | -4.416532 | -1.431242 |
| 1                                                       | 0.707432  | 4.423903  | -1.426802 | 1                                                       | -0.158825 | -3.054884 | -2.502594 |
| 1                                                       | 0.358893  | 3.054953  | -2.496664 | 1                                                       | 1.034436  | -3.610424 | -1.327553 |
| 1                                                       | -1.195865 | -3.629106 | -0.288888 | 1                                                       | 1.286453  | 3.733116  | -0.526133 |
| 1                                                       | 0.136539  | -4.511395 | 0.452378  | 1                                                       | -0.040551 | 4.563929  | 0.272576  |
| 1                                                       | -0.701530 | -3.251217 | 1.367365  | 1                                                       | 0.902486  | 3.369818  | 1.167359  |
| 1                                                       | -3.647861 | 0.829292  | 2.387459  | 1                                                       | 2.876469  | -2.229568 | 0.592001  |
| 1                                                       | -5.381774 | 0.884889  | 2.712715  | 1                                                       | 4.432952  | -2.163629 | 1.402310  |
| 1                                                       | -4.522932 | -0.640023 | 2.782416  | 1                                                       | 2.956283  | -1.918528 | 2.328391  |
| 6                                                       | -4.603645 | 1.403404  | -0.281526 | 6                                                       | 4.603889  | -0.893662 | -1.165113 |
| 1                                                       | -4.760319 | 2.092001  | 0.542697  | 1                                                       | 4.713620  | -0.493086 | -2.169945 |
| 1                                                       | -5.417455 | 1.419342  | -0.991772 | 1                                                       | 5.585449  | -1.235661 | -0.845679 |
| 1                                                       | -3.672636 | 1.708550  | -0.754361 | 1                                                       | 3.953137  | -1.758275 | -1.222686 |
| NImag = 1 (-246.7135 cm <sup>-1</sup> )                 |           |           |           | NImag = 1 (-266.7653 cm <sup>-1</sup> )                 |           |           |           |
| <b>TS6(d-e)</b><br>Et = -1608.7209<br>Gsol = -1609.1125 |           |           |           | <b>TS6(d-g)</b><br>Et = -1608.7400<br>Gsol = -1609.1354 |           |           |           |
| 6                                                       | 4.460360  | 0.660911  | -1.156588 | 6                                                       | 4.579841  | 0.691879  | -0.638086 |
| 6                                                       | 3.141764  | 0.820961  | -0.768368 | 6                                                       | 3.213034  | 0.841486  | -0.488121 |
| 7                                                       | 2.439115  | -0.201854 | -0.251826 | 7                                                       | 2.440915  | -0.184891 | -0.078386 |
| 6                                                       | 3.017418  | -1.406025 | -0.095894 | 6                                                       | 3.000325  | -1.380583 | 0.192339  |

|    |           |           |           |    |           |           |           |
|----|-----------|-----------|-----------|----|-----------|-----------|-----------|
| 6  | 4.325067  | -1.628082 | -0.490762 | 6  | 4.359353  | -1.585566 | 0.034025  |
| 6  | 5.055123  | -0.581568 | -1.025913 | 6  | 5.159828  | -0.537635 | -0.382749 |
| 6  | 2.436271  | 2.132062  | -0.930960 | 6  | 2.540086  | 2.139964  | -0.801673 |
| 15 | 1.103713  | 2.316485  | 0.319763  | 15 | 1.017884  | 2.321903  | 0.200355  |
| 6  | 1.935604  | 2.818634  | 1.853772  | 6  | 1.546574  | 2.877614  | 1.843668  |
| 6  | -2.415648 | 1.140921  | 0.227835  | 46 | 0.373113  | 0.074880  | 0.126899  |
| 6  | -3.682728 | 0.930494  | -0.357342 | 15 | 0.399387  | -2.266362 | 0.094434  |
| 6  | -4.432693 | -0.397090 | -0.349492 | 6  | 0.367351  | -3.034217 | -1.549202 |
| 6  | -4.908325 | -0.609226 | 1.096984  | 6  | 2.112516  | -2.463024 | 0.715074  |
| 6  | 2.212771  | -2.478658 | 0.571162  | 6  | -1.775647 | 0.366831  | 0.418476  |
| 15 | 0.417012  | -2.243190 | 0.269327  | 6  | -3.328008 | 0.709434  | -0.321968 |
| 6  | 0.105855  | -3.021855 | -1.341589 | 6  | -3.669938 | 2.161347  | -0.146580 |
| 6  | -1.530653 | 0.300509  | 1.049603  | 6  | -2.179792 | 0.390470  | -1.101710 |
| 6  | -0.415962 | -3.283264 | 1.498198  | 6  | -4.445259 | -0.301001 | -0.055216 |
| 6  | 0.183380  | 3.790870  | -0.211167 | 6  | -3.973604 | -1.747748 | 0.046745  |
| 6  | -4.367775 | 2.137089  | -0.914367 | 6  | -5.207611 | 0.049052  | 1.221141  |
| 6  | -5.655583 | -0.363795 | -1.266363 | 6  | -0.607684 | -3.325526 | 1.164344  |
| 1  | -2.485428 | 0.823663  | -1.000723 | 6  | 0.118764  | 3.717742  | -0.525606 |
| 1  | 4.767357  | -2.603423 | -0.363237 | 1  | -2.010367 | -0.506601 | 1.004014  |
| 1  | 6.079459  | -0.731306 | -1.332185 | 1  | -1.715570 | 1.180475  | -1.674006 |
| 1  | 5.006726  | 1.496341  | -1.564949 | 1  | 4.782517  | -2.553442 | 0.251358  |
| 1  | 2.364313  | -2.414910 | 1.651025  | 1  | 6.223605  | -0.676357 | -0.503696 |
| 1  | 2.543295  | -3.469030 | 0.262318  | 1  | 5.176695  | 1.529217  | -0.963285 |
| 1  | 1.959903  | 2.167442  | -1.913184 | 1  | 2.063083  | -2.388234 | 1.803920  |
| 1  | 3.140854  | 2.961380  | -0.889762 | 1  | 2.514132  | -3.448099 | 0.483312  |
| 1  | -5.488869 | -1.527732 | 1.144415  | 1  | 2.236260  | 2.146920  | -1.850879 |
| 1  | -5.557754 | 0.200063  | 1.425418  | 1  | 3.220110  | 2.978483  | -0.660797 |
| 1  | -4.086270 | -0.692454 | 1.802786  | 1  | -1.692565 | 1.284173  | 0.979293  |
| 1  | -1.353546 | 0.871497  | 1.963149  | 1  | -2.111896 | -0.580617 | -1.566482 |
| 1  | 1.203847  | 2.950350  | 2.647102  | 1  | -2.845879 | 2.802866  | -0.445274 |
| 1  | 2.636959  | 2.048617  | 2.164308  | 1  | -4.515873 | 2.407929  | -0.785124 |
| 1  | 2.472827  | 3.754736  | 1.713391  | 1  | -3.953279 | 2.398835  | 0.874522  |
| 1  | 0.381548  | -4.074537 | -1.314520 | 1  | 0.637994  | -4.086588 | -1.483341 |
| 1  | -0.945698 | -2.943810 | -1.602514 | 1  | -0.628891 | -2.962299 | -1.978721 |
| 1  | 0.688434  | -2.522261 | -2.111430 | 1  | 1.064400  | -2.528440 | -2.212436 |
| 1  | -5.222569 | 2.343809  | -0.268948 | 1  | 2.059932  | 3.835133  | 1.776328  |
| 1  | -3.734001 | 3.018118  | -0.913017 | 1  | 0.682146  | 2.990478  | 2.493590  |
| 1  | -4.759849 | 1.971240  | -1.912378 | 1  | 2.214521  | 2.144952  | 2.289015  |
| 1  | -0.062811 | -4.310675 | 1.431335  | 1  | -4.844492 | -2.397644 | 0.077018  |
| 1  | -0.225778 | -2.907063 | 2.500031  | 1  | -3.379396 | -2.067644 | -0.808229 |
| 1  | -1.489553 | -3.282024 | 1.326557  | 1  | -3.421169 | -1.932324 | 0.966765  |
| 1  | -0.564545 | 4.055540  | 0.533205  | 1  | -0.194171 | -4.332677 | 1.184279  |
| 1  | 0.860359  | 4.637308  | -0.314561 | 1  | -0.629634 | -2.933702 | 2.178005  |
| 1  | -0.304190 | 3.621263  | -1.167896 | 1  | -1.624391 | -3.383447 | 0.786574  |
| 46 | 0.408023  | 0.077681  | 0.334892  | 1  | -0.752229 | 3.956444  | 0.079354  |
| 1  | -2.103500 | 2.177468  | 0.165059  | 1  | 0.760022  | 4.597461  | -0.553482 |

|                                                                  |           |           |           |                                                         |           |           |           |
|------------------------------------------------------------------|-----------|-----------|-----------|---------------------------------------------------------|-----------|-----------|-----------|
| 1                                                                | -1.973326 | -0.644876 | 1.327735  | 1                                                       | -0.201652 | 3.489505  | -1.538595 |
| 1                                                                | -6.379614 | 0.392497  | -0.975241 | 1                                                       | -4.549310 | 0.074358  | 2.089363  |
| 1                                                                | -5.387652 | -0.208799 | -2.309917 | 1                                                       | -5.718975 | 1.005268  | 1.148873  |
| 1                                                                | -6.160047 | -1.324755 | -1.204101 | 1                                                       | -5.968879 | -0.704282 | 1.409076  |
| 6                                                                | -3.542824 | -1.551071 | -0.814653 | 6                                                       | -5.388167 | -0.197920 | -1.267494 |
| 1                                                                | -3.247351 | -1.417924 | -1.855524 | 1                                                       | -6.218143 | -0.886905 | -1.127921 |
| 1                                                                | -2.648371 | -1.668023 | -0.211963 | 1                                                       | -5.814512 | 0.794755  | -1.382712 |
| 1                                                                | -4.107423 | -2.478368 | -0.754960 | 1                                                       | -4.884614 | -0.466885 | -2.194623 |
| NImag = 1 (-448.8324 cm <sup>-1</sup> )                          |           |           |           | NImag = 1 (-156.1797 cm <sup>-1</sup> )                 |           |           |           |
| <b>TS7<sub>add</sub></b><br>Et = -1687.3413<br>Gsol = -1687.7724 |           |           |           | <b>TS7(c-d)</b><br>Et = -1687.3385<br>Gsol = -1687.7519 |           |           |           |
| 7                                                                | 2.794906  | -0.080379 | -0.387285 | 6                                                       | 5.579331  | -1.157290 | -0.176216 |
| 6                                                                | 3.502700  | -1.217551 | -0.252611 | 6                                                       | 5.226158  | 0.172166  | -0.325173 |
| 6                                                                | 4.764924  | -1.340821 | -0.806026 | 6                                                       | 3.889083  | 0.524979  | -0.259772 |
| 6                                                                | 5.315680  | -0.265536 | -1.480183 | 7                                                       | 2.937628  | -0.395191 | -0.030417 |
| 6                                                                | 4.589143  | 0.906721  | -1.592705 | 6                                                       | 3.273346  | -1.684322 | 0.135898  |
| 6                                                                | 3.320642  | 0.970848  | -1.044402 | 6                                                       | 4.591548  | -2.098828 | 0.052146  |
| 6                                                                | 2.903138  | -2.322197 | 0.561823  | 6                                                       | 3.447481  | 1.940326  | -0.482292 |
| 15                                                               | 1.069144  | -2.266496 | 0.517135  | 15                                                      | 1.849220  | 2.278904  | 0.359199  |
| 6                                                                | 0.581094  | -3.170738 | -0.978929 | 6                                                       | 2.275190  | 2.701555  | 2.072981  |
| 6                                                                | 2.471782  | 2.196613  | -1.192322 | 46                                                      | 0.873649  | 0.203097  | 0.066884  |
| 15                                                               | 1.280027  | 2.333382  | 0.196159  | 6                                                       | -1.059933 | 0.884247  | 0.214219  |
| 6                                                                | 2.180949  | 3.085056  | 1.578852  | 1                                                       | -1.348900 | 0.730419  | 1.255953  |
| 46                                                               | 0.862544  | 0.058999  | 0.449092  | 6                                                       | 2.174488  | -2.645786 | 0.470085  |
| 6                                                                | -0.982414 | 0.231357  | 1.526313  | 15                                                      | 0.550750  | -2.099940 | -0.201234 |
| 6                                                                | -1.731264 | 0.100996  | 0.348385  | 6                                                       | 0.526831  | -2.718356 | -1.911645 |
| 1                                                                | -1.871252 | 0.951770  | -0.299500 | 6                                                       | 1.245074  | 3.822433  | -0.377362 |
| 6                                                                | 0.044460  | 3.553706  | -0.319143 | 6                                                       | -0.640328 | -3.148057 | 0.686233  |
| 1                                                                | -0.983546 | -0.597596 | 2.222083  | 6                                                       | -2.093262 | 0.230454  | -0.708582 |
| 6                                                                | 0.509487  | -3.272022 | 1.916418  | 1                                                       | -1.728545 | 0.228368  | -1.737547 |
| 6                                                                | -3.941809 | -0.005707 | 1.171110  | 6                                                       | -3.380815 | 1.011898  | -0.794101 |
| 6                                                                | -4.360542 | 0.417076  | -0.054712 | 6                                                       | -3.257756 | 2.256432  | -1.628708 |
| 6                                                                | -4.716740 | -0.546465 | -1.176159 | 6                                                       | -4.626694 | 0.647746  | -0.235009 |
| 6                                                                | -3.871755 | -0.276606 | -2.427814 | 6                                                       | -4.891726 | -0.667611 | 0.531496  |
| 6                                                                | -3.881915 | 0.825814  | 2.408040  | 6                                                       | -4.852589 | -1.808115 | -0.494006 |
| 6                                                                | -4.608760 | 1.870839  | -0.305830 | 6                                                       | -5.836388 | 1.465349  | -0.588618 |
| 6                                                                | -4.555946 | -2.012391 | -0.786571 | 6                                                       | -6.284792 | -0.660063 | 1.169100  |
| 6                                                                | -6.196299 | -0.310092 | -1.521900 | 6                                                       | -3.903438 | -0.896727 | 1.678936  |
| 1                                                                | -5.614851 | 2.129751  | 0.028048  | 1                                                       | -3.816141 | 1.360463  | 0.443941  |
| 1                                                                | -4.549423 | 2.131660  | -1.357441 | 1                                                       | 4.838655  | -3.140657 | 0.181655  |
| 1                                                                | 5.313035  | -2.262804 | -0.693215 | 1                                                       | 6.614986  | -1.456382 | -0.234653 |

|                                                         |           |           |           |                                                         |           |           |           |
|---------------------------------------------------------|-----------|-----------|-----------|---------------------------------------------------------|-----------|-----------|-----------|
| 1                                                       | 6.303155  | -0.338898 | -1.910346 | 1                                                       | 5.975088  | 0.927442  | -0.503846 |
| 1                                                       | 4.994007  | 1.761326  | -2.111272 | 1                                                       | 2.064013  | -2.688705 | 1.556038  |
| 1                                                       | 3.198043  | -2.191849 | 1.605636  | 1                                                       | 2.420634  | -3.653404 | 0.138336  |
| 1                                                       | 3.281915  | -3.293037 | 0.246388  | 1                                                       | 3.280650  | 2.097272  | -1.550262 |
| 1                                                       | 1.883768  | 2.117061  | -2.109438 | 1                                                       | 4.220425  | 2.643748  | -0.176364 |
| 1                                                       | 3.086935  | 3.090042  | -1.286854 | 1                                                       | -6.453645 | 0.849887  | -1.243008 |
| 1                                                       | -0.973387 | 1.199279  | 2.008954  | 1                                                       | -5.615939 | 2.380241  | -1.120062 |
| 1                                                       | -3.896267 | -1.072912 | 1.340640  | 1                                                       | -6.435591 | 1.700310  | 0.283823  |
| 1                                                       | -3.927507 | 2.510636  | 0.248688  | 1                                                       | -1.056405 | 1.959347  | 0.041421  |
| 1                                                       | -1.880815 | -0.863285 | -0.107796 | 1                                                       | -2.266060 | -0.801367 | -0.435004 |
| 1                                                       | -4.836215 | -2.640694 | -1.628729 | 1                                                       | 1.370513  | 2.915985  | 2.636377  |
| 1                                                       | -3.528141 | -2.270407 | -0.527063 | 1                                                       | 2.779153  | 1.862807  | 2.546095  |
| 1                                                       | -5.197761 | -2.287548 | 0.047889  | 1                                                       | 2.925052  | 3.573966  | 2.106883  |
| 1                                                       | -6.502510 | -1.012954 | -2.294162 | 1                                                       | 0.649341  | -3.799565 | -1.934910 |
| 1                                                       | -6.835631 | -0.468253 | -0.655346 | 1                                                       | -0.415607 | -2.464156 | -2.390110 |
| 1                                                       | -6.376314 | 0.691871  | -1.902937 | 1                                                       | 1.330028  | -2.257792 | -2.481282 |
| 1                                                       | -3.130396 | 0.451898  | 3.100875  | 1                                                       | -3.735815 | 3.129019  | -1.196294 |
| 1                                                       | -3.688265 | 1.878144  | 2.221065  | 1                                                       | -2.213662 | 2.491116  | -1.801625 |
| 1                                                       | -4.837823 | 0.762595  | 2.929390  | 1                                                       | -3.726937 | 2.068701  | -2.595072 |
| 1                                                       | 0.946668  | -4.195295 | -0.938708 | 1                                                       | -5.101179 | -2.743036 | 0.003296  |
| 1                                                       | -0.502079 | -3.194777 | -1.067572 | 1                                                       | -5.588755 | -1.658301 | -1.281956 |
| 1                                                       | 0.987449  | -2.682809 | -1.861139 | 1                                                       | -3.880503 | -1.927659 | -0.965566 |
| 1                                                       | 2.539594  | 4.076552  | 1.308436  | 1                                                       | -6.425172 | -1.603113 | 1.691238  |
| 1                                                       | 1.526948  | 3.173410  | 2.442929  | 1                                                       | -6.398921 | 0.132428  | 1.906262  |
| 1                                                       | 3.028001  | 2.462326  | 1.854769  | 1                                                       | -7.087777 | -0.580719 | 0.441990  |
| 1                                                       | -4.196463 | -0.936786 | -3.229284 | 1                                                       | -4.172377 | -1.817527 | 2.190893  |
| 1                                                       | -3.976511 | 0.741507  | -2.794335 | 1                                                       | -2.868197 | -0.989933 | 1.372070  |
| 1                                                       | -2.812593 | -0.471855 | -2.260329 | 1                                                       | -3.969064 | -0.095369 | 2.414886  |
| 1                                                       | 0.922556  | -4.277274 | 1.852893  | 1                                                       | -1.632363 | -3.041426 | 0.255193  |
| 1                                                       | 0.819381  | -2.820819 | 2.855475  | 1                                                       | -0.353124 | -4.195679 | 0.614056  |
| 1                                                       | -0.575240 | -3.349161 | 1.909211  | 1                                                       | -0.683830 | -2.864837 | 1.734623  |
| 1                                                       | -0.682171 | 3.701866  | 0.476268  | 1                                                       | 0.335075  | 4.140226  | 0.126087  |
| 1                                                       | 0.519374  | 4.511009  | -0.527080 | 1                                                       | 1.985115  | 4.613421  | -0.271334 |
| 1                                                       | -0.473931 | 3.218319  | -1.213550 | 1                                                       | 1.030102  | 3.679298  | -1.433084 |
| NImag = 1 (-212.1265 cm <sup>-1</sup> )                 |           |           |           | NImag = 1 (-295.8139 cm <sup>-1</sup> )                 |           |           |           |
| <b>TS7(c-e)</b><br>Et = -1687.3376<br>Gsol = -1687.7653 |           |           |           | <b>TS7(d-e)</b><br>Et = -1687.3426<br>Gsol = -1687.7653 |           |           |           |
| 6                                                       | 5.134627  | -0.583165 | 1.339650  | 6                                                       | -4.688410 | 0.161228  | 1.534322  |
| 6                                                       | 4.197102  | -1.598500 | 1.406789  | 6                                                       | -3.452493 | 0.499707  | 1.011658  |
| 6                                                       | 2.932625  | -1.382343 | 0.887307  | 7                                                       | -2.713019 | -0.397624 | 0.337587  |
| 7                                                       | 2.608528  | -0.216420 | 0.304276  | 6                                                       | -3.171903 | -1.648020 | 0.153262  |

|    |           |           |           |    |           |           |           |
|----|-----------|-----------|-----------|----|-----------|-----------|-----------|
| 6  | 3.521793  | 0.766030  | 0.210118  | 6  | -4.389132 | -2.047336 | 0.677152  |
| 6  | 4.793041  | 0.614113  | 0.735898  | 6  | -5.156669 | -1.130944 | 1.374161  |
| 6  | 1.864778  | -2.428559 | 0.976149  | 6  | -2.876747 | 1.870242  | 1.198194  |
| 15 | 0.652913  | -2.253771 | -0.395142 | 15 | -1.730148 | 2.293186  | -0.173926 |
| 6  | -0.672665 | -3.415784 | 0.050862  | 6  | -2.792738 | 2.795222  | -1.558513 |
| 46 | 0.637550  | 0.093132  | -0.472736 | 6  | 1.877442  | 1.522948  | -0.578532 |
| 6  | -1.181674 | 0.523983  | -1.337438 | 6  | 3.200264  | 1.330762  | -0.130323 |
| 1  | -1.447357 | 1.569179  | -1.223457 | 6  | 3.901811  | 0.015407  | -0.323571 |
| 6  | 3.132429  | 2.005664  | -0.535679 | 6  | 4.865870  | 0.215122  | -1.500609 |
| 15 | 1.323928  | 2.304412  | -0.436030 | 6  | -2.346695 | -2.572659 | -0.688538 |
| 6  | 0.945319  | 3.467544  | -1.772322 | 15 | -0.563449 | -2.143660 | -0.601399 |
| 6  | 1.456192  | -3.009600 | -1.839192 | 6  | 0.067140  | -3.008693 | 0.865112  |
| 6  | 1.068254  | 3.226138  | 1.106589  | 6  | 0.994923  | 0.633663  | -1.353022 |
| 6  | -2.387337 | -0.318494 | -1.119252 | 6  | 0.201375  | -2.965213 | -2.024311 |
| 1  | -2.298255 | -1.358368 | -1.416991 | 6  | -0.919292 | 3.826757  | 0.367072  |
| 6  | -3.779936 | 0.185900  | -1.135376 | 6  | 3.912961  | 2.511647  | 0.441440  |
| 6  | -4.800285 | -0.405692 | -2.077080 | 6  | 4.539833  | -0.637128 | 0.941080  |
| 6  | -3.610027 | -0.348750 | 0.276801  | 6  | 3.579665  | -0.507339 | 2.122010  |
| 6  | -3.684436 | 0.657994  | 1.452228  | 6  | 5.909206  | -0.072202 | 1.313155  |
| 6  | -3.279067 | -0.019838 | 2.759573  | 6  | 4.715728  | -2.125992 | 0.635986  |
| 6  | -4.190100 | -1.726340 | 0.512791  | 1  | 2.062105  | 1.149467  | 0.611218  |
| 6  | -5.140089 | 1.123266  | 1.539231  | 1  | -4.735951 | -3.057022 | 0.523979  |
| 6  | -2.778939 | 1.867384  | 1.245819  | 1  | -6.113275 | -1.419312 | 1.783072  |
| 1  | -3.808699 | 1.269262  | -1.149126 | 1  | -5.267597 | 0.898072  | 2.068007  |
| 1  | 5.508342  | 1.417378  | 0.656275  | 1  | -2.646826 | -2.459375 | -1.732826 |
| 1  | 6.123701  | -0.725579 | 1.748218  | 1  | -2.522998 | -3.613107 | -0.420196 |
| 1  | 4.436581  | -2.544376 | 1.866383  | 1  | -2.293546 | 1.894102  | 2.121348  |
| 1  | 3.370675  | 1.869303  | -1.592961 | 1  | -3.665698 | 2.613702  | 1.301581  |
| 1  | 3.700994  | 2.868110  | -0.191745 | 1  | 5.315731  | -0.735923 | -1.769550 |
| 1  | 1.312289  | -2.303066 | 1.909841  | 1  | 5.670722  | 0.904258  | -1.262394 |
| 1  | 2.298920  | -3.427236 | 0.995659  | 1  | 4.346222  | 0.588055  | -2.381329 |
| 1  | -3.795183 | -2.187658 | 1.410593  | 1  | 0.666762  | 1.209526  | -2.219538 |
| 1  | -4.020135 | -2.396359 | -0.323483 | 1  | 3.140404  | -0.690118 | -0.654834 |
| 1  | -5.267294 | -1.630055 | 0.627340  | 1  | -2.181986 | 3.067495  | -2.415830 |
| 1  | -0.969733 | 0.361964  | -2.400971 | 1  | -3.436352 | 1.969101  | -1.849561 |
| 1  | -2.388975 | -0.578691 | 0.227969  | 1  | -3.409950 | 3.648171  | -1.282517 |
| 1  | 0.799104  | -2.955132 | -2.703669 | 1  | -0.089369 | -4.081823 | 0.771837  |
| 1  | 2.370170  | -2.470900 | -2.075722 | 1  | 1.131500  | -2.822691 | 0.980541  |
| 1  | 1.697613  | -4.053200 | -1.646408 | 1  | -0.442328 | -2.651456 | 1.756382  |
| 1  | 1.643380  | 4.150268  | 1.097181  | 1  | 4.728144  | 2.761088  | -0.236836 |
| 1  | 0.016689  | 3.474148  | 1.223385  | 1  | 3.269884  | 3.382893  | 0.520499  |
| 1  | 1.377171  | 2.623611  | 1.956892  | 1  | 4.356758  | 2.304171  | 1.408461  |
| 1  | -5.808343 | -0.174193 | -1.742882 | 1  | 5.145082  | -2.635216 | 1.495991  |
| 1  | -4.677408 | 0.030855  | -3.064888 | 1  | 3.762562  | -2.606567 | 0.412593  |
| 1  | -4.715474 | -1.483467 | -2.179249 | 1  | 5.385195  | -2.298315 | -0.203608 |
| 1  | -3.272580 | 0.715494  | 3.560511  | 1  | 3.937774  | -1.090176 | 2.967845  |

|                                                         |           |           |           |                                                                  |           |           |           |
|---------------------------------------------------------|-----------|-----------|-----------|------------------------------------------------------------------|-----------|-----------|-----------|
| 1                                                       | -3.970454 | -0.803059 | 3.057976  | 1                                                                | 3.479599  | 0.518909  | 2.477795  |
| 1                                                       | -2.275381 | -0.444310 | 2.701669  | 1                                                                | 2.585039  | -0.886261 | 1.874292  |
| 1                                                       | -5.239530 | 1.824781  | 2.364727  | 1                                                                | 6.281217  | -0.586403 | 2.196952  |
| 1                                                       | -5.459840 | 1.635206  | 0.633661  | 1                                                                | 6.638556  | -0.232261 | 0.522749  |
| 1                                                       | -5.825961 | 0.302232  | 1.733297  | 1                                                                | 5.898649  | 0.988629  | 1.548407  |
| 1                                                       | -2.892497 | 2.534556  | 2.097004  | 1                                                                | -0.017495 | -4.031420 | -2.014570 |
| 1                                                       | -1.730477 | 1.575127  | 1.193042  | 1                                                                | -0.168038 | -2.534657 | -2.951380 |
| 1                                                       | -3.031925 | 2.446142  | 0.360019  | 1                                                                | 1.280894  | -2.839688 | -1.992046 |
| 1                                                       | 1.542353  | 4.372157  | -1.672953 | 1                                                                | -0.305410 | 4.229340  | -0.435716 |
| 1                                                       | 1.148220  | 3.011830  | -2.737837 | 1                                                                | -1.666202 | 4.577316  | 0.620434  |
| 1                                                       | -0.104856 | 3.747046  | -1.736404 | 1                                                                | -0.297364 | 3.650117  | 1.240935  |
| 1                                                       | -1.369291 | -3.530274 | -0.776078 | 46                                                               | -0.810683 | 0.155724  | -0.452498 |
| 1                                                       | -0.253236 | -4.396980 | 0.267257  | 1                                                                | 1.519677  | 2.538643  | -0.449570 |
| 1                                                       | -1.212539 | -3.070201 | 0.928654  | 1                                                                | 1.511604  | -0.247156 | -1.714029 |
| NImag = 1 (-293.6542 cm <sup>-1</sup> )                 |           |           |           | NImag = 1 (-353.6212 cm <sup>-1</sup> )                          |           |           |           |
| <b>TS7(d-g)</b><br>Et = -1687.3475<br>Gsol = -1687.7791 |           |           |           | <b>TS8<sub>add</sub></b><br>Et = -1765.9619<br>Gsol = -1766.4024 |           |           |           |
| 6                                                       | 5.534651  | -0.656599 | 0.005882  | 6                                                                | 3.348180  | -1.758520 | 0.030064  |
| 6                                                       | 5.015577  | 0.589010  | -0.297034 | 6                                                                | 4.624529  | -2.210594 | -0.256440 |
| 6                                                       | 3.644926  | 0.774354  | -0.286479 | 6                                                                | 5.553055  | -1.326704 | -0.775920 |
| 7                                                       | 2.808054  | -0.232960 | 0.034675  | 6                                                                | 5.180589  | -0.014582 | -1.007423 |
| 6                                                       | 3.306449  | -1.444838 | 0.351595  | 6                                                                | 3.883260  | 0.378769  | -0.729232 |
| 6                                                       | 4.668658  | -1.684802 | 0.330356  | 7                                                                | 2.989287  | -0.486235 | -0.216475 |
| 6                                                       | 3.044092  | 2.091983  | -0.658873 | 6                                                                | 3.417944  | 1.771061  | -1.026919 |
| 15                                                      | 1.430556  | 2.313382  | 0.178859  | 15                                                               | 2.024235  | 2.250250  | 0.066446  |
| 6                                                       | 0.658868  | 3.743284  | -0.623414 | 6                                                                | 1.268340  | 3.695624  | -0.724002 |
| 6                                                       | -1.440131 | 0.388478  | 0.082020  | 46                                                               | 1.014875  | 0.171067  | 0.232607  |
| 6                                                       | -1.598520 | 0.556938  | -1.470350 | 6                                                                | -0.863783 | 0.988687  | 0.853327  |
| 6                                                       | -2.832147 | 0.845260  | -0.801280 | 6                                                                | -1.037276 | 0.606011  | 2.302652  |
| 6                                                       | -3.998281 | -0.145567 | -0.795166 | 6                                                                | 2.336444  | -2.654578 | 0.672750  |
| 6                                                       | -4.957407 | -0.112980 | 0.448005  | 15                                                               | 0.621051  | -2.145018 | 0.261129  |
| 6                                                       | -5.875334 | 1.113709  | 0.418331  | 6                                                                | -0.405802 | -3.069269 | 1.438129  |
| 6                                                       | 2.345266  | -2.507066 | 0.776535  | 6                                                                | 2.770561  | 2.865000  | 1.601881  |
| 15                                                      | 0.702800  | -2.258810 | 0.003546  | 6                                                                | 0.280230  | -2.888114 | -1.362049 |
| 6                                                       | -0.437339 | -3.251211 | 1.001803  | 6                                                                | -1.728103 | 0.413355  | -0.135521 |
| 6                                                       | 1.800173  | 2.841415  | 1.874086  | 6                                                                | -1.653431 | 0.845405  | -1.565884 |
| 6                                                       | 0.776265  | -3.050965 | -1.626013 | 6                                                                | -3.669706 | 1.187708  | 0.555123  |
| 6                                                       | -3.135650 | 2.306400  | -0.606927 | 6                                                                | -3.475341 | 2.674387  | 0.607739  |
| 6                                                       | -3.572601 | -1.556235 | -1.184001 | 6                                                                | -4.460152 | 0.565353  | -0.379658 |
| 6                                                       | -5.890250 | -1.328032 | 0.408877  | 6                                                                | -4.936199 | 1.324780  | -1.568324 |
| 6                                                       | -4.195753 | -0.149510 | 1.769781  | 6                                                                | -4.970823 | -0.852426 | -0.213996 |
| 1                                                       | -1.744408 | -0.537447 | 0.539639  | 6                                                                | -4.616298 | -1.469330 | 1.134976  |



|    |           |           |           |   |           |           |           |
|----|-----------|-----------|-----------|---|-----------|-----------|-----------|
| 1  | -1.055532 | 1.386016  | -1.898289 | 6 | -6.505093 | -0.807843 | -0.322899 |
| 1  | 5.042081  | -2.664825 | 0.581811  | 6 | -4.427401 | -1.751096 | -1.333767 |
| 1  | 6.601246  | -0.823019 | -0.007175 | 1 | -5.874403 | 1.820251  | -1.304829 |
| 1  | 5.663721  | 1.412096  | -0.553061 | 1 | -5.146991 | 0.692622  | -2.425226 |
| 1  | 2.197997  | -2.441132 | 1.857088  | 1 | 4.888163  | -3.237237 | -0.057069 |
| 1  | 2.740317  | -3.500571 | 0.571249  | 1 | 6.557384  | -1.656193 | -0.995549 |
| 1  | 2.853029  | 2.112772  | -1.734203 | 1 | 5.882680  | 0.697039  | -1.412278 |
| 1  | 3.728809  | 2.910108  | -0.441408 | 1 | 2.434844  | -2.577548 | 1.758035  |
| 1  | -1.365419 | 1.235665  | 0.745953  | 1 | 2.514950  | -3.696936 | 0.413209  |
| 1  | -1.473219 | -0.367763 | -2.007625 | 1 | 3.043653  | 1.810979  | -2.052342 |
| 1  | -2.272978 | 2.919786  | -0.853174 | 1 | 4.241286  | 2.480780  | -0.963712 |
| 1  | -3.943147 | 2.592856  | -1.278116 | 1 | -0.755996 | 2.060252  | 0.717259  |
| 1  | -3.450291 | 2.542364  | 0.403736  | 1 | -3.557956 | 0.674363  | 1.499525  |
| 1  | 1.001314  | -4.111175 | -1.524038 | 1 | -4.250161 | 2.111129  | -1.866332 |
| 1  | -0.179595 | -2.949946 | -2.134169 | 1 | -2.023810 | -0.613204 | 0.033198  |
| 1  | 1.542821  | -2.581192 | -2.236959 | 1 | -5.014886 | -2.479966 | 1.183637  |
| 1  | 2.346619  | 3.782846  | 1.869786  | 1 | -3.541148 | -1.539481 | 1.298946  |
| 1  | 0.876115  | 2.977183  | 2.430813  | 1 | -5.049014 | -0.912222 | 1.963653  |
| 1  | 2.395176  | 2.085550  | 2.379887  | 1 | -6.902144 | -1.806098 | -0.151218 |
| 1  | -4.442778 | -2.173536 | -1.370229 | 1 | -6.938260 | -0.146299 | 0.425059  |
| 1  | -2.997608 | -1.573747 | -2.105734 | 1 | -6.842184 | -0.486628 | -1.304587 |
| 1  | -2.999448 | -2.049747 | -0.399068 | 1 | -0.705452 | 0.513910  | -1.989882 |
| 1  | -4.600055 | 0.225754  | -1.633810 | 1 | -2.445562 | 0.413874  | -2.166863 |
| 1  | -6.631964 | -1.234021 | 1.198667  | 1 | -1.687225 | 1.928406  | -1.659786 |
| 1  | -6.432937 | -1.394086 | -0.533654 | 1 | -2.774210 | 2.949124  | 1.390586  |
| 1  | -5.369141 | -2.268109 | 0.574190  | 1 | -3.124731 | 3.102682  | -0.328649 |
| 1  | -3.571848 | 0.730622  | 1.919567  | 1 | -4.418901 | 3.165231  | 0.845090  |
| 1  | -4.900719 | -0.183636 | 2.597956  | 1 | -1.850935 | 1.168204  | 2.764755  |
| 1  | -3.568688 | -1.037974 | 1.855685  | 1 | -1.260644 | -0.451715 | 2.421364  |
| 1  | -5.365291 | 2.055978  | 0.582587  | 1 | -0.144664 | 0.822855  | 2.884869  |
| 1  | -6.413635 | 1.179677  | -0.526687 | 1 | 0.384706  | -3.970761 | -1.320316 |
| 1  | -6.621576 | 1.025954  | 1.205059  | 1 | -0.731569 | -2.649384 | -1.680228 |
| 1  | -0.068285 | -4.272708 | 1.080699  | 1 | 0.971686  | -2.493349 | -2.102275 |
| 1  | -0.533541 | -2.832256 | 2.000063  | 1 | 3.401077  | 3.729789  | 1.403314  |
| 1  | -1.418469 | -3.283320 | 0.536559  | 1 | 1.991286  | 3.155539  | 2.302399  |
| 1  | -0.260143 | 4.010958  | -0.108392 | 1 | 3.370914  | 2.084926  | 2.062956  |
| 1  | 1.331069  | 4.598983  | -0.578529 | 1 | -4.863297 | -2.743465 | -1.240024 |
| 1  | 0.435398  | 3.532621  | -1.665893 | 1 | -4.677260 | -1.383312 | -2.325573 |
| 46 | 0.741287  | 0.078183  | 0.021174  | 1 | -3.344744 | -1.864413 | -1.276850 |
|    |           |           |           | 1 | -0.191937 | -4.134487 | 1.367111  |
|    |           |           |           | 1 | -0.209301 | -2.738441 | 2.454526  |
|    |           |           |           | 1 | -1.460491 | -2.920155 | 1.221570  |
|    |           |           |           | 1 | 0.479353  | 4.097436  | -0.092820 |
|    |           |           |           | 1 | 2.012023  | 4.476286  | -0.874323 |
|    |           |           |           | 1 | 0.842961  | 3.423168  | -1.686190 |

NImag = 1 (-140.1019 cm<sup>-1</sup>)

|                                                         |           |           |           | NImag = 1 (-293.9292 cm <sup>-1</sup> )                 |           |           |           |
|---------------------------------------------------------|-----------|-----------|-----------|---------------------------------------------------------|-----------|-----------|-----------|
| <b>TS8(c-d)</b><br>Et = -1765.9516<br>Gsol = -1766.3779 |           |           |           | <b>TS8(d-e)</b><br>Et = -1765.9462<br>Gsol = -1766.3788 |           |           |           |
| 6                                                       | 5.616139  | -1.262944 | -0.610046 | 6                                                       | -5.240915 | 0.387499  | -0.721580 |
| 6                                                       | 5.245657  | 0.054511  | -0.814202 | 6                                                       | -3.982356 | -0.142736 | -0.495567 |
| 6                                                       | 3.932117  | 0.427142  | -0.585148 | 7                                                       | -2.954060 | 0.637555  | -0.120974 |
| 7                                                       | 3.023298  | -0.458770 | -0.146865 | 6                                                       | -3.138525 | 1.958013  | 0.039649  |
| 6                                                       | 3.379118  | -1.733748 | 0.072787  | 6                                                       | -4.368072 | 2.546801  | -0.200768 |
| 6                                                       | 4.671117  | -2.170652 | -0.166216 | 6                                                       | -5.433021 | 1.750411  | -0.582242 |
| 6                                                       | 3.463561  | 1.825419  | -0.855310 | 6                                                       | -3.713453 | -1.603831 | -0.695609 |
| 15                                                      | 2.007849  | 2.251361  | 0.180896  | 15                                                      | -2.285482 | -2.155628 | 0.316148  |
| 6                                                       | 2.684342  | 2.799716  | 1.774734  | 6                                                       | -2.946224 | -2.467738 | 1.978394  |
| 46                                                      | 0.982254  | 0.176486  | 0.213206  | 6                                                       | 1.753735  | -1.149800 | -0.683983 |
| 6                                                       | -0.915823 | 0.908057  | 0.625149  | 6                                                       | 3.164251  | -0.959291 | -0.759983 |
| 6                                                       | -1.279597 | 0.547545  | 2.053740  | 6                                                       | 4.020962  | -0.483445 | 0.374467  |
| 6                                                       | 2.339220  | -2.651422 | 0.636970  | 6                                                       | 4.743066  | -1.737966 | 0.888458  |
| 15                                                      | 0.633862  | -2.148001 | 0.163385  | 6                                                       | -1.984040 | 2.760919  | 0.551260  |
| 6                                                       | 0.388208  | -2.886020 | -1.482331 | 15                                                      | -0.357356 | 2.033341  | 0.095528  |
| 6                                                       | 1.318209  | 3.748068  | -0.578731 | 6                                                       | 0.025805  | 2.745934  | -1.534330 |
| 6                                                       | -0.399489 | -3.151951 | 1.271932  | 6                                                       | 0.835139  | -1.168348 | 0.517716  |
| 6                                                       | -1.973672 | 0.477221  | -0.402402 | 6                                                       | 0.780274  | 2.851212  | 1.252596  |
| 6                                                       | -1.534220 | 0.740088  | -1.847541 | 6                                                       | -1.842567 | -3.790988 | -0.332366 |
| 6                                                       | -3.296587 | 1.211892  | -0.238536 | 6                                                       | 3.850050  | -1.328816 | -2.038889 |
| 6                                                       | -3.209493 | 2.712970  | -0.342494 | 6                                                       | 4.971394  | 0.735004  | 0.098276  |
| 6                                                       | -4.575270 | 0.618897  | -0.098060 | 6                                                       | 4.295561  | 1.732577  | -0.838195 |
| 6                                                       | -4.865906 | -0.903670 | -0.126949 | 6                                                       | 6.350958  | 0.377848  | -0.454923 |
| 6                                                       | -4.430747 | -1.462556 | -1.486979 | 6                                                       | 5.184777  | 1.415524  | 1.453305  |
| 6                                                       | -5.775245 | 1.523755  | -0.116855 | 1                                                       | 2.130003  | -0.010519 | -0.990052 |
| 6                                                       | -6.365353 | -1.187954 | 0.015256  | 1                                                       | -4.490531 | 3.610608  | -0.071915 |
| 6                                                       | -4.184947 | -1.631724 | 1.035296  | 1                                                       | -6.403556 | 2.186592  | -0.764603 |
| 1                                                       | -3.872552 | 0.890069  | 0.938314  | 1                                                       | -6.052612 | -0.259247 | -1.015175 |
| 1                                                       | 4.933487  | -3.201825 | 0.010350  | 1                                                       | -2.022946 | 2.768996  | 1.642989  |
| 1                                                       | 6.632358  | -1.578425 | -0.792335 | 1                                                       | -2.053684 | 3.798611  | 0.228355  |
| 1                                                       | 5.961151  | 0.783874  | -1.159781 | 1                                                       | -3.449954 | -1.780147 | -1.740817 |
| 1                                                       | 2.384839  | -2.606248 | 1.727501  | 1                                                       | -4.604104 | -2.196060 | -0.490759 |
| 1                                                       | 2.535603  | -3.685220 | 0.356519  | 1                                                       | 5.347706  | -1.476489 | 1.752549  |
| 1                                                       | 3.141426  | 1.898369  | -1.896396 | 1                                                       | 5.402702  | -2.174038 | 0.143097  |
| 1                                                       | 4.273727  | 2.541195  | -0.724211 | 1                                                       | 4.036357  | -2.502580 | 1.204628  |
| 1                                                       | -6.225948 | 1.442576  | -1.106586 | 1                                                       | 0.558257  | -2.224808 | 0.523831  |
| 1                                                       | -5.548647 | 2.566436  | 0.053937  | 1                                                       | 3.359531  | -0.151169 | 1.163465  |
| 1                                                       | -6.524200 | 1.210492  | 0.600111  | 1                                                       | -2.148211 | -2.801277 | 2.637296  |
| 1                                                       | -0.819225 | 1.990813  | 0.567764  | 1                                                       | -3.366997 | -1.553024 | 2.387772  |
| 1                                                       | -2.143398 | -0.588169 | -0.295627 | 1                                                       | -3.718629 | -3.234062 | 1.949154  |



|                                                                                                                                        |           |           |           |                                                                                                                                        |           |           |           |
|----------------------------------------------------------------------------------------------------------------------------------------|-----------|-----------|-----------|----------------------------------------------------------------------------------------------------------------------------------------|-----------|-----------|-----------|
| 1                                                                                                                                      | 1.873171  | 3.065731  | 2.448061  | 1                                                                                                                                      | 0.026766  | 3.833434  | -1.490854 |
| 1                                                                                                                                      | 3.253153  | 1.993578  | 2.230934  | 1                                                                                                                                      | 1.004505  | 2.416409  | -1.874818 |
| 1                                                                                                                                      | 3.331816  | 3.664960  | 1.645501  | 1                                                                                                                                      | -0.714656 | 2.420511  | -2.260796 |
| 1                                                                                                                                      | 0.534629  | -3.964130 | -1.450596 | 1                                                                                                                                      | 4.908658  | -1.124918 | -1.981913 |
| 1                                                                                                                                      | -0.617728 | -2.682797 | -1.841328 | 1                                                                                                                                      | 3.710286  | -2.393216 | -2.224657 |
| 1                                                                                                                                      | 1.093714  | -2.453736 | -2.187573 | 1                                                                                                                                      | 3.452343  | -0.802190 | -2.902353 |
| 1                                                                                                                                      | -2.210820 | 1.022221  | 2.387824  | 1                                                                                                                                      | 5.841754  | 2.275503  | 1.343124  |
| 1                                                                                                                                      | -1.395433 | -0.524787 | 2.196515  | 1                                                                                                                                      | 4.246591  | 1.770543  | 1.880413  |
| 1                                                                                                                                      | -0.513749 | 0.881535  | 2.750338  | 1                                                                                                                                      | 5.649525  | 0.747923  | 2.176230  |
| 1                                                                                                                                      | -2.303999 | 0.481278  | -2.572147 | 1                                                                                                                                      | 4.881160  | 2.647161  | -0.902562 |
| 1                                                                                                                                      | -1.259938 | 1.780156  | -2.004873 | 1                                                                                                                                      | 4.197099  | 1.352707  | -1.855152 |
| 1                                                                                                                                      | -0.653609 | 0.136878  | -2.055514 | 1                                                                                                                                      | 3.306180  | 2.019166  | -0.475298 |
| 1                                                                                                                                      | -3.623837 | 3.219620  | 0.524845  | 1                                                                                                                                      | 6.957139  | 1.280723  | -0.494303 |
| 1                                                                                                                                      | -2.180881 | 3.031294  | -0.441492 | 1                                                                                                                                      | 6.878706  | -0.327042 | 0.182196  |
| 1                                                                                                                                      | -3.759571 | 3.053341  | -1.217606 | 1                                                                                                                                      | 6.336759  | -0.020541 | -1.466185 |
| 1                                                                                                                                      | -4.734181 | -2.504863 | -1.554160 | 1                                                                                                                                      | 0.694732  | 3.933180  | 1.167618  |
| 1                                                                                                                                      | -4.917709 | -0.933929 | -2.305048 | 1                                                                                                                                      | 0.545989  | 2.559290  | 2.273186  |
| 1                                                                                                                                      | -3.358452 | -1.420842 | -1.649007 | 1                                                                                                                                      | 1.809602  | 2.574429  | 1.043900  |
| 1                                                                                                                                      | -6.508722 | -2.263902 | -0.044421 | 1                                                                                                                                      | -1.027864 | -4.215100 | 0.250097  |
| 1                                                                                                                                      | -6.765951 | -0.870398 | 0.975149  | 1                                                                                                                                      | -2.692880 | -4.467255 | -0.265720 |
| 1                                                                                                                                      | -6.960545 | -0.745543 | -0.778933 | 1                                                                                                                                      | -1.530988 | -3.722332 | -1.370993 |
| 1                                                                                                                                      | -4.417227 | -2.692398 | 0.972713  | 6                                                                                                                                      | 1.099199  | -1.778165 | -1.897338 |
| 1                                                                                                                                      | -3.105687 | -1.528136 | 1.044198  | 6                                                                                                                                      | 1.303084  | -0.822287 | 1.917914  |
| 1                                                                                                                                      | -4.562882 | -1.276620 | 1.993449  | 1                                                                                                                                      | 1.568073  | 0.224402  | 2.043150  |
| 1                                                                                                                                      | -1.446217 | -3.070156 | 0.993021  | 1                                                                                                                                      | 0.486598  | -1.016379 | 2.610552  |
| 1                                                                                                                                      | -0.113201 | -4.200487 | 1.209095  | 1                                                                                                                                      | 2.141218  | -1.433230 | 2.254996  |
| 1                                                                                                                                      | -0.286208 | -2.818104 | 2.300071  | 1                                                                                                                                      | 1.422258  | -1.354536 | -2.841554 |
| 1                                                                                                                                      | 0.501958  | 4.130279  | 0.029798  | 1                                                                                                                                      | 1.335503  | -2.841719 | -1.918328 |
| 1                                                                                                                                      | 2.076494  | 4.525511  | -0.652059 | 1                                                                                                                                      | 0.023346  | -1.663106 | -1.829919 |
| 1                                                                                                                                      | 0.942532  | 3.527317  | -1.574323 | 46                                                                                                                                     | -1.000766 | -0.223343 | 0.174439  |
| NImag = 1 (-293.3629 cm <sup>-1</sup> )                                                                                                |           |           |           | NImag = 1 (-493.3713 cm <sup>-1</sup> )                                                                                                |           |           |           |
| <p style="text-align: center;"><b>TS8(c-e)</b><br/>                     Et = -1765.9362<br/>                     Gsol = -1766.3759</p> |           |           |           | <p style="text-align: center;"><b>TS8(d-g)</b><br/>                     Et = -1765.9594<br/>                     Gsol = -1766.4059</p> |           |           |           |
| 6                                                                                                                                      | 5.122413  | -0.140008 | -0.862139 | 6                                                                                                                                      | 5.143662  | -0.887455 | 0.385266  |
| 6                                                                                                                                      | 3.841337  | 0.304123  | -0.583150 | 6                                                                                                                                      | 5.774886  | 0.252166  | -0.079645 |
| 7                                                                                                                                      | 2.882773  | -0.544032 | -0.174151 | 6                                                                                                                                      | 5.008199  | 1.320945  | -0.509431 |
| 6                                                                                                                                      | 3.159691  | -1.849986 | -0.032585 | 6                                                                                                                                      | 3.629383  | 1.220825  | -0.479700 |
| 6                                                                                                                                      | 4.415065  | -2.355382 | -0.324394 | 7                                                                                                                                      | 3.023805  | 0.104957  | -0.026622 |
| 6                                                                                                                                      | 5.409534  | -1.487874 | -0.739766 | 6                                                                                                                                      | 3.761322  | -0.933826 | 0.413699  |
| 6                                                                                                                                      | 3.466584  | 1.744216  | -0.762524 | 6                                                                                                                                      | 2.755199  | 2.333256  | -0.960891 |

|    |           |           |           |    |           |           |           |
|----|-----------|-----------|-----------|----|-----------|-----------|-----------|
| 15 | 2.056531  | 2.199052  | 0.320210  | 15 | 1.186638  | 2.339786  | -0.015454 |
| 6  | 2.780182  | 2.562441  | 1.945655  | 6  | 1.556641  | 3.080207  | 1.597639  |
| 46 | 0.890522  | 0.190690  | 0.227643  | 15 | 1.433674  | -2.296716 | 0.065232  |
| 15 | 0.394341  | -2.101479 | 0.109068  | 6  | 1.908045  | -3.003196 | -1.539600 |
| 6  | 0.035574  | -2.775577 | -1.543171 | 6  | 3.027699  | -2.117888 | 0.954654  |
| 6  | 2.076508  | -2.729395 | 0.508323  | 6  | -1.315770 | -0.165876 | 0.482039  |
| 6  | -0.956182 | 1.032671  | 0.670025  | 6  | -2.793532 | 0.103892  | -0.303701 |
| 6  | -2.023039 | 0.995583  | -0.419671 | 6  | -2.696332 | 1.074950  | -1.447375 |
| 6  | -3.403963 | 1.551826  | -0.170780 | 6  | -2.061306 | -1.146775 | -0.425458 |
| 6  | -3.765434 | 0.159173  | -0.628738 | 6  | -1.541774 | -1.655070 | -1.743462 |
| 6  | -4.107797 | -0.032939 | -2.091927 | 6  | -1.276611 | -0.354775 | 1.980630  |
| 6  | -1.278502 | 0.778762  | 2.126506  | 6  | -3.985134 | 0.220963  | 0.629310  |
| 6  | -0.657541 | -3.058422 | 1.240110  | 6  | -4.002911 | 1.570198  | 1.339135  |
| 6  | 1.476900  | 3.800506  | -0.306424 | 6  | -5.359803 | -0.140394 | -0.038871 |
| 6  | -1.404165 | 1.235440  | -1.776958 | 6  | -5.973952 | 1.011633  | -0.831859 |
| 6  | -3.888312 | 2.781149  | -0.901896 | 6  | -5.220442 | -1.360109 | -0.946059 |
| 6  | -4.544438 | -0.791407 | 0.310660  | 6  | -6.329244 | -0.509642 | 1.086601  |
| 6  | -5.967631 | -0.210460 | 0.374995  | 1  | 5.713709  | -1.732415 | 0.737578  |
| 6  | -4.020591 | -0.866151 | 1.734622  | 1  | 6.852770  | 0.308936  | -0.102992 |
| 6  | -4.582722 | -2.206036 | -0.265811 | 1  | 5.471298  | 2.223757  | -0.874842 |
| 1  | -3.583266 | 1.656166  | 0.894000  | 1  | 2.802004  | -1.955468 | 2.010679  |
| 1  | 4.612089  | -3.409566 | -0.209582 | 1  | 3.632848  | -3.020328 | 0.888946  |
| 1  | 6.399040  | -1.857793 | -0.962243 | 1  | 2.498887  | 2.172424  | -2.010307 |
| 1  | 5.877641  | 0.560215  | -1.182557 | 1  | 3.267202  | 3.291982  | -0.898592 |
| 1  | 2.149527  | -2.745422 | 1.598263  | 1  | -0.957684 | 0.796335  | 0.093471  |
| 1  | 2.200558  | -3.757541 | 0.171151  | 1  | -2.469845 | -1.935610 | 0.197522  |
| 1  | 3.140640  | 1.904248  | -1.792576 | 6  | 0.519064  | -3.585652 | 0.948595  |
| 1  | 4.324568  | 2.394379  | -0.598095 | 6  | 0.096551  | 3.511636  | -0.863474 |
| 1  | -3.581028 | -0.869889 | -2.540836 | 1  | -0.970685 | -2.567616 | -1.598852 |
| 1  | -3.959277 | 0.849775  | -2.697157 | 1  | -2.373633 | -1.907530 | -2.398088 |
| 1  | -5.166955 | -0.264470 | -2.149866 | 1  | -0.911830 | -0.936432 | -2.259794 |
| 1  | -0.770606 | 2.110748  | 0.589502  | 1  | -1.697004 | 1.107545  | -1.877164 |
| 1  | -2.509990 | -0.253423 | -0.527561 | 1  | -3.365839 | 0.762354  | -2.245963 |
| 1  | 1.998223  | 2.852166  | 2.643357  | 1  | -2.982618 | 2.080445  | -1.154299 |
| 1  | 3.274967  | 1.677237  | 2.336666  | 1  | -2.257063 | -0.291828 | 2.445510  |
| 1  | 3.502439  | 3.373539  | 1.874322  | 1  | -0.865846 | -1.324748 | 2.250138  |
| 1  | 0.095222  | -3.862306 | -1.541830 | 1  | -0.658777 | 0.405860  | 2.453861  |
| 1  | -0.962554 | -2.485088 | -1.862257 | 1  | 2.413057  | -3.955929 | -1.389535 |
| 1  | 0.749244  | -2.383054 | -2.263409 | 1  | 1.039494  | -3.165301 | -2.169805 |
| 1  | -2.172611 | 1.297495  | 2.473145  | 1  | 2.580927  | -2.323551 | -2.056256 |
| 1  | -1.383735 | -0.274210 | 2.363571  | 1  | 1.916237  | 4.100119  | 1.472394  |
| 1  | -0.454985 | 1.153328  | 2.730536  | 1  | 0.657791  | 3.101688  | 2.209082  |
| 1  | -2.092205 | 1.220705  | -2.608830 | 1  | 2.312023  | 2.496378  | 2.117051  |
| 1  | -0.964724 | 2.230912  | -1.743182 | 1  | -4.802242 | 1.615367  | 2.072633  |
| 1  | -0.602721 | 0.525623  | -1.961126 | 1  | -3.069739 | 1.749038  | 1.871603  |
| 1  | -4.967759 | 2.872805  | -0.810061 | 1  | -4.155693 | 2.396436  | 0.649608  |

|                                         |           |           |           |                                         |           |           |           |
|-----------------------------------------|-----------|-----------|-----------|-----------------------------------------|-----------|-----------|-----------|
| 1                                       | -3.452030 | 3.670087  | -0.452638 | 1                                       | -3.856918 | -0.556962 | 1.383241  |
| 1                                       | -3.639909 | 2.791813  | -1.958196 | 1                                       | -7.297477 | -0.776059 | 0.667449  |
| 1                                       | -5.100642 | -2.864702 | 0.426872  | 1                                       | -5.972552 | -1.366637 | 1.657332  |
| 1                                       | -5.109136 | -2.266690 | -1.213815 | 1                                       | -6.497545 | 0.313215  | 1.777571  |
| 1                                       | -3.580395 | -2.610512 | -0.411645 | 1                                       | -5.352800 | 1.348285  | -1.658376 |
| 1                                       | -6.566570 | -0.845849 | 1.023636  | 1                                       | -6.919687 | 0.685701  | -1.260583 |
| 1                                       | -5.976088 | 0.790343  | 0.802144  | 1                                       | -6.192685 | 1.869915  | -0.200655 |
| 1                                       | -6.466875 | -0.179061 | -0.589409 | 1                                       | -4.606838 | -1.162930 | -1.824511 |
| 1                                       | -4.668567 | -1.525070 | 2.307073  | 1                                       | -4.799842 | -2.213764 | -0.414231 |
| 1                                       | -3.019668 | -1.283691 | 1.776294  | 1                                       | -6.200520 | -1.662964 | -1.308640 |
| 1                                       | -4.022863 | 0.093438  | 2.241927  | 1                                       | 1.082939  | -4.516902 | 0.928434  |
| 1                                       | -0.438524 | -4.121079 | 1.149399  | 1                                       | 0.356377  | -3.298017 | 1.983558  |
| 1                                       | -0.482798 | -2.750923 | 2.268009  | 1                                       | -0.444840 | -3.757642 | 0.477841  |
| 1                                       | -1.707269 | -2.908256 | 1.007144  | 1                                       | -0.842543 | 3.606236  | -0.323937 |
| 1                                       | 0.662600  | 4.172601  | 0.311272  | 1                                       | 0.569017  | 4.492050  | -0.901249 |
| 1                                       | 2.282166  | 4.532408  | -0.277576 | 1                                       | -0.111861 | 3.181109  | -1.877189 |
| 1                                       | 1.127465  | 3.707937  | -1.331329 | 46                                      | 0.940297  | -0.002116 | 0.043735  |
| NImag = 1 (-625.8991 cm <sup>-1</sup> ) |           |           |           | NImag = 1 (-360.1231 cm <sup>-1</sup> ) |           |           |           |
| <b>1a</b>                               |           |           |           | <b>1c</b>                               |           |           |           |
| Et = -1365.3425                         |           |           |           | Et = -1561.8745                         |           |           |           |
| Gsol = -1365.7388                       |           |           |           | Gsol = -1562.2566                       |           |           |           |
| 7                                       | 0.000000  | -1.416630 | 0.000000  | 6                                       | -3.065533 | 1.130576  | -0.168683 |
| 6                                       | -1.131398 | -2.093037 | 0.308063  | 6                                       | -4.395104 | 1.171831  | -0.550391 |
| 6                                       | -1.154334 | -3.474215 | 0.301533  | 6                                       | -4.990629 | 0.028241  | -1.051048 |
| 6                                       | 0.000000  | -4.174610 | 0.000000  | 6                                       | -4.240451 | -1.128379 | -1.166294 |
| 6                                       | 1.154334  | -3.474215 | -0.301533 | 6                                       | -2.907165 | -1.109533 | -0.797100 |
| 6                                       | 1.131398  | -2.093037 | -0.308063 | 7                                       | -2.338381 | 0.007384  | -0.307643 |
| 6                                       | -2.344386 | -1.310209 | 0.704622  | 6                                       | -2.039983 | -2.321056 | -0.969808 |
| 15                                      | -2.319638 | 0.359041  | -0.044915 | 15                                      | -0.607033 | -2.286290 | 0.178677  |
| 6                                       | -3.054511 | 0.225402  | -1.693442 | 6                                       | 0.604394  | -3.437995 | -0.523596 |
| 6                                       | 2.344386  | -1.310209 | -0.704622 | 78                                      | -0.283222 | -0.008473 | 0.277261  |
| 15                                      | 2.319638  | 0.359041  | 0.044915  | 6                                       | 1.672959  | -0.040678 | 0.945387  |
| 6                                       | 3.054511  | 0.225403  | 1.693442  | 1                                       | 1.831357  | 0.786595  | 1.638119  |
| 78                                      | 0.000000  | 0.650543  | 0.000000  | 6                                       | -2.409993 | 2.317005  | 0.472110  |
| 6                                       | 0.097562  | 2.760262  | 0.681539  | 15                                      | -0.583805 | 2.278222  | 0.276345  |
| 6                                       | -0.097562 | 2.760262  | -0.681539 | 6                                       | 0.058570  | 3.341766  | 1.595491  |
| 6                                       | 3.415947  | 1.403490  | -0.942276 | 6                                       | -1.169151 | -3.056647 | 1.720959  |
| 6                                       | -3.415947 | 1.403489  | 0.942276  | 6                                       | -0.243889 | 3.162434  | -1.273223 |
| 1                                       | -2.067699 | -3.993018 | 0.545906  | 6                                       | 2.683706  | 0.048332  | -0.188327 |
| 1                                       | 0.000000  | -5.254324 | 0.000000  | 1                                       | 2.595713  | -0.798935 | -0.866598 |
| 1                                       | 2.067699  | -3.993018 | -0.545906 | 6                                       | 4.184947  | 0.054342  | 0.407500  |
| 1                                       | -2.339168 | -1.171378 | 1.788295  | 6                                       | 4.512093  | -1.225788 | 1.151807  |
| 1                                       | -3.255144 | -1.852865 | 0.458253  | 6                                       | 4.941244  | 0.328695  | -0.790142 |

|                   |           |           |           |                   |           |           |           |
|-------------------|-----------|-----------|-----------|-------------------|-----------|-----------|-----------|
| 1                 | 2.339168  | -1.171378 | -1.788295 | 6                 | 5.516743  | -0.751128 | -1.591159 |
| 1                 | 3.255145  | -1.852864 | -0.458253 | 6                 | 5.148362  | 1.707880  | -1.231993 |
| 1                 | 1.078795  | 2.927148  | 1.100144  | 1                 | 6.458633  | -1.017579 | -1.091336 |
| 1                 | -1.078796 | 2.927148  | -1.100144 | 1                 | 5.753808  | -0.460231 | -2.608800 |
| 1                 | -4.088188 | -0.107313 | -1.617958 | 1                 | -4.957951 | 2.084875  | -0.437390 |
| 1                 | -3.038259 | 1.192554  | -2.190366 | 1                 | -6.029638 | 0.036813  | -1.343787 |
| 1                 | -2.494445 | -0.481546 | -2.300011 | 1                 | -4.678150 | -2.035872 | -1.551055 |
| 1                 | 4.088188  | -0.107313 | 1.617958  | 1                 | -2.607171 | 2.283958  | 1.546016  |
| 1                 | 3.038259  | 1.192554  | 2.190366  | 1                 | -2.837231 | 3.247286  | 0.101695  |
| 1                 | 2.494445  | -0.481545 | 2.300011  | 1                 | -1.629647 | -2.319349 | -1.981997 |
| 1                 | -4.423167 | 0.990104  | 0.944733  | 1                 | -2.623123 | -3.234449 | -0.865664 |
| 1                 | -3.060569 | 1.471734  | 1.967250  | 1                 | 1.839956  | -0.952234 | 1.515332  |
| 1                 | -3.463702 | 2.403691  | 0.517104  | 1                 | 4.217129  | 0.921642  | 1.066581  |
| 1                 | 3.463702  | 2.403691  | -0.517103 | 1                 | 4.918194  | -1.658183 | -1.564798 |
| 1                 | 4.423167  | 0.990104  | -0.944733 | 1                 | 2.523719  | 0.954089  | -0.769841 |
| 1                 | 3.060569  | 1.471734  | -1.967250 | 1                 | 3.950660  | -1.261526 | 2.079372  |
| 1                 | -0.728435 | 2.903131  | 1.363328  | 1                 | 4.265641  | -2.116088 | 0.577146  |
| 1                 | 0.728434  | 2.903131  | -1.363328 | 1                 | 5.566865  | -1.268997 | 1.413643  |
|                   |           |           |           | 1                 | -0.618544 | 4.183109  | -1.226279 |
|                   |           |           |           | 1                 | 0.826858  | 3.193493  | -1.457939 |
|                   |           |           |           | 1                 | -0.718176 | 2.645394  | -2.103340 |
|                   |           |           |           | 1                 | -1.475773 | -4.087057 | 1.552701  |
|                   |           |           |           | 1                 | -0.365362 | -3.042352 | 2.452963  |
|                   |           |           |           | 1                 | -2.005713 | -2.494501 | 2.127711  |
|                   |           |           |           | 1                 | -0.384452 | 4.334314  | 1.543139  |
|                   |           |           |           | 1                 | -0.158951 | 2.903402  | 2.565875  |
|                   |           |           |           | 1                 | 1.136706  | 3.441605  | 1.497920  |
|                   |           |           |           | 1                 | 1.466788  | -3.502317 | 0.135674  |
|                   |           |           |           | 1                 | 0.177726  | -4.433946 | -0.625520 |
|                   |           |           |           | 1                 | 0.930516  | -3.090049 | -1.500182 |
|                   |           |           |           | 1                 | 6.225846  | 1.896641  | -1.138051 |
|                   |           |           |           | 1                 | 4.936876  | 1.827437  | -2.294249 |
|                   |           |           |           | 1                 | 4.622730  | 2.443816  | -0.634200 |
| <b>4a</b>         |           |           |           | <b>4c</b>         |           |           |           |
| Et = -1443.9770   |           |           |           | Et = -1758.4142   |           |           |           |
| Gsol = -1444.3818 |           |           |           | Gsol = -1758.8516 |           |           |           |
| 6                 | -2.310058 | 1.127700  | 0.303105  | 6                 | 4.534737  | -2.250478 | -0.345469 |
| 6                 | -3.691723 | 1.150783  | 0.297657  | 6                 | 5.472486  | -1.357912 | -0.832244 |
| 6                 | -4.392625 | -0.004043 | 0.001779  | 6                 | 5.110408  | -0.036517 | -1.022538 |
| 6                 | -3.689800 | -1.157431 | -0.295214 | 6                 | 3.814633  | 0.357573  | -0.737990 |
| 6                 | -2.308208 | -1.131543 | -0.302620 | 7                 | 2.912220  | -0.516160 | -0.257616 |
| 7                 | -1.630138 | -0.001253 | -0.000147 | 6                 | 3.260746  | -1.797611 | -0.050339 |
| 6                 | -1.525499 | -2.345777 | -0.687491 | 6                 | 3.360653  | 1.762271  | -0.997551 |

|    |           |           |           |    |           |           |           |
|----|-----------|-----------|-----------|----|-----------|-----------|-----------|
| 15 | 0.136490  | -2.313746 | 0.073347  | 15 | 1.928992  | 2.210013  | 0.060223  |
| 6  | 1.133284  | -3.492778 | -0.870038 | 78 | 0.916814  | 0.149014  | 0.208560  |
| 78 | 0.452320  | 0.000403  | 0.000108  | 15 | 0.526887  | -2.134817 | 0.229629  |
| 6  | 2.593628  | -0.348538 | 0.599452  | 6  | 0.088338  | -2.882438 | -1.367762 |
| 6  | 2.853591  | 0.253105  | 1.939748  | 6  | 2.240678  | -2.704252 | 0.566205  |
| 6  | -1.529322 | 2.343700  | 0.686482  | 6  | 2.621799  | 2.861384  | 1.605152  |
| 15 | 0.132046  | 2.313980  | -0.075734 | 6  | -0.950657 | 0.899975  | 0.766338  |
| 6  | 1.127096  | 3.497170  | 0.864277  | 6  | -2.085132 | 0.423076  | -0.140099 |
| 6  | -0.021101 | -2.998709 | 1.741977  | 6  | -1.830868 | 0.720354  | -1.608386 |
| 6  | -0.028728 | 2.995260  | -1.745570 | 6  | -1.174083 | 0.593083  | 2.238183  |
| 6  | 2.594371  | 0.353374  | -0.594367 | 6  | -3.481301 | 1.076599  | 0.385787  |
| 6  | 2.859594  | -0.247871 | -1.933832 | 6  | -4.544644 | 0.525157  | -0.435170 |
| 1  | -4.209274 | 2.065827  | 0.538299  | 6  | -5.153425 | -0.810496 | -0.170423 |
| 1  | -5.472258 | -0.005146 | 0.002582  | 6  | -6.690217 | -0.650210 | -0.175288 |
| 1  | -4.205854 | -2.073485 | -0.535223 | 6  | -3.429519 | 2.597305  | 0.448194  |
| 1  | -1.380085 | 2.346181  | 1.768708  | 6  | -5.072024 | 1.325116  | -1.543165 |
| 1  | -2.074538 | 3.252238  | 0.437623  | 6  | -4.755330 | -1.747341 | -1.335936 |
| 1  | -1.377055 | -2.347057 | -1.769835 | 6  | -4.739844 | -1.440454 | 1.155271  |
| 1  | -2.068791 | -3.255561 | -0.439011 | 1  | -5.835283 | 1.972471  | -1.088470 |
| 1  | 2.762309  | -1.416226 | 0.529706  | 1  | -5.568764 | 0.750143  | -2.315309 |
| 1  | 2.760550  | 1.421410  | -0.524303 | 1  | 4.789558  | -3.284875 | -0.177170 |
| 1  | 2.238674  | 0.189593  | -2.711477 | 1  | 6.475361  | -1.687626 | -1.057688 |
| 1  | 3.896859  | -0.041651 | -2.202170 | 1  | 5.819423  | 0.682797  | -1.400852 |
| 1  | 2.725691  | -1.324857 | -1.935650 | 1  | 2.365737  | -2.682459 | 1.651201  |
| 1  | 3.890023  | 0.047667  | 2.211877  | 1  | 2.391794  | -3.735405 | 0.250930  |
| 1  | 2.718887  | 1.330002  | 1.940947  | 1  | 3.018831  | 1.836692  | -2.032232 |
| 1  | 2.230169  | -0.184741 | 2.715185  | 1  | 4.184291  | 2.465102  | -0.884633 |
| 1  | -0.393899 | 4.019678  | -1.700833 | 1  | -0.890733 | 1.982200  | 0.648744  |
| 1  | 0.938557  | 2.995005  | -2.242555 | 1  | -3.584915 | 0.667077  | 1.388210  |
| 1  | -0.717704 | 2.394766  | -2.333711 | 1  | -4.333495 | 1.998817  | -1.964402 |
| 1  | -0.381884 | -4.024602 | 1.695470  | 1  | -2.200521 | -0.653709 | -0.011178 |
| 1  | 0.946204  | -2.995204 | 2.238918  | 1  | -5.211200 | -2.415969 | 1.242558  |
| 1  | -0.712621 | -2.402243 | 2.331242  | 1  | -3.666460 | -1.590940 | 1.235979  |
| 1  | 0.666587  | 4.482376  | 0.808397  | 1  | -5.070480 | -0.849281 | 2.007157  |
| 1  | 1.194111  | 3.199955  | 1.907290  | 1  | -7.124536 | -1.619265 | 0.058024  |
| 1  | 2.129972  | 3.572611  | 0.451052  | 1  | -7.023536 | 0.051450  | 0.586546  |
| 1  | 2.136029  | -3.568388 | -0.456515 | 1  | -7.082139 | -0.338391 | -1.138210 |
| 1  | 0.673859  | -4.478680 | -0.817580 | 6  | -0.467936 | -3.029920 | 1.455676  |
| 1  | 1.200487  | -3.192069 | -1.912037 | 6  | 1.159876  | 3.631964  | -0.758695 |
|    |           |           |           | 1  | -0.864919 | 0.307137  | -1.890645 |
|    |           |           |           | 1  | -2.579079 | 0.286482  | -2.269656 |
|    |           |           |           | 1  | -1.786133 | 1.790514  | -1.804214 |
|    |           |           |           | 1  | -2.764360 | 2.903097  | 1.249057  |
|    |           |           |           | 1  | -3.074984 | 3.055911  | -0.470662 |
|    |           |           |           | 1  | -4.408022 | 3.014098  | 0.675747  |
|    |           |           |           | 1  | -2.005247 | 1.155079  | 2.671842  |

|                   |           |           |           |           |
|-------------------|-----------|-----------|-----------|-----------|
|                   | 1         | -1.373994 | -0.464515 | 2.405749  |
|                   | 1         | -0.297248 | 0.848223  | 2.829466  |
|                   | 1         | 0.151225  | -3.967772 | -1.319433 |
|                   | 1         | -0.924186 | -2.602186 | -1.646640 |
|                   | 1         | 0.763118  | -2.519417 | -2.138853 |
|                   | 1         | 3.234746  | 3.740161  | 1.414422  |
|                   | 1         | 1.816218  | 3.135458  | 2.282068  |
|                   | 1         | 3.227495  | 2.099438  | 2.088656  |
|                   | 1         | -5.246520 | -2.703185 | -1.169654 |
|                   | 1         | -5.076215 | -1.375541 | -2.304560 |
|                   | 1         | -3.682651 | -1.922882 | -1.366627 |
|                   | 1         | -0.284231 | -4.100333 | 1.382325  |
|                   | 1         | -0.218887 | -2.695204 | 2.459055  |
|                   | 1         | -1.526204 | -2.852638 | 1.284365  |
|                   | 1         | 0.342128  | 4.010758  | -0.150576 |
|                   | 1         | 1.884870  | 4.432698  | -0.891435 |
|                   | 1         | 0.768719  | 3.340455  | -1.729658 |
| <b>5a</b>         |           |           |           |           |
| Et = -1372.9018   |           |           |           |           |
| Gsol = -1373.2954 |           |           |           |           |
| 7                 | 0.000000  | 1.297959  | 0.000000  |           |
| 6                 | -1.118318 | 1.971328  | -0.344168 |           |
| 6                 | -1.144565 | 3.353567  | -0.339815 |           |
| 6                 | 0.000000  | 4.053138  | 0.000000  |           |
| 6                 | 1.144565  | 3.353567  | 0.339815  |           |
| 6                 | 1.118318  | 1.971328  | 0.344168  |           |
| 6                 | -2.312222 | 1.175765  | -0.770338 |           |
| 15                | -2.319323 | -0.462362 | 0.049536  |           |
| 6                 | -3.030511 | -0.230258 | 1.698828  |           |
| 6                 | 2.312222  | 1.175765  | 0.770338  |           |
| 15                | 2.319323  | -0.462362 | -0.049536 |           |
| 6                 | 3.030511  | -0.230258 | -1.698828 |           |
| 46                | 0.000000  | -0.782485 | 0.000000  |           |
| 6                 | 0.123375  | -2.932617 | -0.670456 |           |
| 6                 | -0.123375 | -2.932617 | 0.670455  |           |
| 6                 | 3.460410  | -1.515126 | 0.878696  |           |
| 6                 | -3.460410 | -1.515126 | -0.878696 |           |
| 1                 | -2.049378 | 3.872792  | -0.613519 |           |
| 1                 | 0.000000  | 5.132846  | 0.000000  |           |
| 1                 | 2.049378  | 3.872792  | 0.613518  |           |
| 1                 | -2.259834 | 0.995398  | -1.846557 |           |
| 1                 | -3.235686 | 1.722073  | -0.585257 |           |
| 1                 | 2.259834  | 0.995398  | 1.846557  |           |
| 1                 | 3.235686  | 1.722073  | 0.585257  |           |
| <b>5c</b>         |           |           |           |           |
| Et = -1569.4320   |           |           |           |           |
| Gsol = -1569.8127 |           |           |           |           |
| 7                 | -2.367324 | -0.130319 | -0.258080 |           |
| 6                 | -3.197096 | 0.915810  | -0.112518 |           |
| 6                 | -4.528688 | 0.828241  | -0.481572 |           |
| 6                 | -5.012610 | -0.369802 | -0.976489 |           |
| 6                 | -4.155058 | -1.449078 | -1.098497 |           |
| 6                 | -2.826579 | -1.296640 | -0.740617 |           |
| 6                 | -2.646440 | 2.159234  | 0.519844  |           |
| 15                | -0.833892 | 2.320330  | 0.253987  |           |
| 6                 | -0.660528 | 3.180430  | -1.337821 |           |
| 6                 | -1.840194 | -2.413696 | -0.911855 |           |
| 15                | -0.438680 | -2.259734 | 0.269290  |           |
| 6                 | -1.022461 | -3.002680 | 1.820498  |           |
| 46                | -0.306638 | 0.061848  | 0.302581  |           |
| 6                 | 1.639825  | 0.258882  | 0.954947  |           |
| 6                 | 2.643405  | 0.101715  | -0.166608 |           |
| 1                 | 2.611765  | -0.900953 | -0.589717 |           |
| 6                 | 0.815338  | -3.414576 | -0.357356 |           |
| 1                 | 1.751889  | 1.232048  | 1.429061  |           |
| 6                 | -0.279167 | 3.509742  | 1.505924  |           |
| 6                 | 4.142670  | 0.362019  | 0.396940  |           |
| 6                 | 4.907361  | 0.275700  | -0.822185 |           |
| 6                 | 5.033678  | 1.440846  | -1.698236 |           |
| 6                 | 4.508508  | -0.595747 | 1.513274  |           |
| 6                 | 5.564802  | -0.967909 | -1.222703 |           |

|                   |           |           |           |                   |           |           |           |
|-------------------|-----------|-----------|-----------|-------------------|-----------|-----------|-----------|
| 1                 | 1.123426  | -3.068252 | -1.054360 | 1                 | 6.515222  | -0.988961 | -0.671050 |
| 1                 | -1.123426 | -3.068253 | 1.054360  | 1                 | 5.798482  | -1.015333 | -2.280935 |
| 1                 | -4.052516 | 0.136200  | 1.617209  | 1                 | -5.177996 | 1.681459  | -0.364519 |
| 1                 | -3.043841 | -1.173579 | 2.239329  | 1                 | -6.050074 | -0.463087 | -1.260077 |
| 1                 | -2.440397 | 0.484199  | 2.266955  | 1                 | -4.506645 | -2.395264 | -1.478505 |
| 1                 | 4.052516  | 0.136200  | -1.617209 | 1                 | -2.796769 | 2.096659  | 1.600046  |
| 1                 | 3.043841  | -1.173579 | -2.239329 | 1                 | -3.182827 | 3.043198  | 0.178373  |
| 1                 | 2.440398  | 0.484199  | -2.266955 | 1                 | -1.412384 | -2.358535 | -1.915349 |
| 1                 | -4.454234 | -1.069964 | -0.890522 | 1                 | -2.331245 | -3.382303 | -0.830661 |
| 1                 | -3.120353 | -1.640106 | -1.903577 | 1                 | 1.787078  | -0.495270 | 1.724226  |
| 1                 | -3.535392 | -2.494046 | -0.410299 | 1                 | 4.123966  | 1.395257  | 0.742795  |
| 1                 | 3.535392  | -2.494046 | 0.410299  | 1                 | 5.027724  | -1.852972 | -0.891425 |
| 1                 | 4.454234  | -1.069964 | 0.890522  | 1                 | 2.446728  | 0.810474  | -0.967632 |
| 1                 | 3.120353  | -1.640106 | 1.903577  | 1                 | 3.934614  | -0.355373 | 2.402208  |
| 1                 | -0.677973 | -3.036783 | -1.388390 | 1                 | 4.304391  | -1.633299 | 1.257296  |
| 1                 | 0.677973  | -3.036784 | 1.388390  | 1                 | 5.560364  | -0.508864 | 1.775939  |
|                   |           |           |           | 1                 | -1.161275 | 4.146491  | -1.312642 |
|                   |           |           |           | 1                 | 0.390897  | 3.341320  | -1.562046 |
|                   |           |           |           | 1                 | -1.091655 | 2.577651  | -2.132992 |
|                   |           |           |           | 1                 | -1.296461 | -4.045814 | 1.674839  |
|                   |           |           |           | 1                 | -0.240915 | -2.946552 | 2.574239  |
|                   |           |           |           | 1                 | -1.886164 | -2.455045 | 2.188624  |
|                   |           |           |           | 1                 | -0.836156 | 4.441776  | 1.431647  |
|                   |           |           |           | 1                 | -0.411589 | 3.094094  | 2.501475  |
|                   |           |           |           | 1                 | 0.776218  | 3.729910  | 1.364408  |
|                   |           |           |           | 1                 | 1.664699  | -3.437008 | 0.321379  |
|                   |           |           |           | 1                 | 0.410116  | -4.422437 | -0.426823 |
|                   |           |           |           | 1                 | 1.156255  | -3.105822 | -1.342149 |
|                   |           |           |           | 1                 | 4.475371  | 2.306673  | -1.361125 |
|                   |           |           |           | 1                 | 6.099551  | 1.700547  | -1.718903 |
|                   |           |           |           | 1                 | 4.791438  | 1.188697  | -2.731118 |
| <b>8a</b>         |           |           |           | <b>8c</b>         |           |           |           |
| Et = -1451.5378   |           |           |           | Et = -1765.9732   |           |           |           |
| Gsol = -1451.9396 |           |           |           | Gsol = -1766.4076 |           |           |           |
| 7                 | -1.553718 | -0.002099 | -0.000104 | 6                 | 5.245408  | 0.056612  | -0.977186 |
| 6                 | -2.227412 | -1.121450 | -0.336410 | 6                 | 3.939758  | 0.423010  | -0.697284 |
| 6                 | -3.609900 | -1.151004 | -0.331209 | 7                 | 3.054820  | -0.467724 | -0.221702 |
| 6                 | -4.312025 | -0.006296 | 0.001215  | 6                 | 3.424583  | -1.740997 | -0.015557 |
| 6                 | -3.613071 | 1.140544  | 0.332932  | 6                 | 4.708336  | -2.171258 | -0.305949 |
| 6                 | -2.230486 | 1.115202  | 0.336821  | 6                 | 5.630372  | -1.258664 | -0.786593 |
| 6                 | -1.431937 | -2.317464 | -0.751437 | 6                 | 3.453285  | 1.817918  | -0.955860 |
| 15                | 0.208305  | -2.315432 | 0.062598  | 15                | 2.028570  | 2.249448  | 0.122758  |
| 6                 | -0.028980 | -2.987737 | 1.728250  | 6                 | 2.754268  | 2.856410  | 1.673688  |



|    |           |           |           |    |           |           |           |
|----|-----------|-----------|-----------|----|-----------|-----------|-----------|
| 6  | -1.438304 | 2.313717  | 0.750986  | 46 | 1.035164  | 0.161264  | 0.238026  |
| 15 | 0.201307  | 2.316168  | -0.064239 | 15 | 0.687005  | -2.154961 | 0.225092  |
| 6  | -0.039779 | 2.985209  | -1.730678 | 6  | 0.327350  | -2.895685 | -1.398095 |
| 46 | 0.538137  | 0.000776  | 0.000002  | 6  | 2.415476  | -2.666398 | 0.593844  |
| 6  | 2.711621  | 0.387134  | -0.568701 | 6  | -0.844371 | 0.862285  | 0.785777  |
| 6  | 2.711592  | -0.379621 | 0.572659  | 6  | -1.937082 | 0.377629  | -0.159938 |
| 6  | 2.918942  | 0.147775  | 1.952188  | 6  | -3.352064 | 0.977918  | 0.342679  |
| 6  | 1.196070  | 3.531703  | 0.836437  | 6  | -4.410053 | 0.466243  | -0.523354 |
| 6  | 2.923994  | -0.139557 | -1.947757 | 6  | -4.802854 | 1.222637  | -1.718166 |
| 6  | 1.206520  | -3.526087 | -0.840817 | 6  | -1.057327 | 0.497242  | 2.241601  |
| 1  | -4.126542 | -2.059119 | -0.598740 | 6  | -0.295106 | -3.130366 | 1.403197  |
| 1  | -5.391681 | -0.007941 | 0.001749  | 6  | 1.285065  | 3.711554  | -0.653286 |
| 1  | -4.132210 | 2.047094  | 0.600943  | 6  | -1.638759 | 0.711932  | -1.612546 |
| 1  | -1.253384 | -2.276379 | -1.828421 | 6  | -3.338010 | 2.499838  | 0.464374  |
| 1  | -1.976153 | -3.239870 | -0.555088 | 6  | -5.184012 | -0.746685 | -0.170786 |
| 1  | -1.258926 | 2.273532  | 1.827867  | 6  | -6.231060 | -0.124403 | 0.817575  |
| 1  | -1.985462 | 3.234402  | 0.554704  | 6  | -4.400444 | -1.824567 | 0.577721  |
| 1  | 2.859920  | 1.452390  | -0.440790 | 6  | -5.934369 | -1.379335 | -1.339824 |
| 1  | 2.863612  | -1.444408 | 0.445156  | 1  | -3.481329 | 0.539294  | 1.329487  |
| 1  | 2.274520  | -0.337168 | 2.681645  | 1  | 4.983133  | -3.200935 | -0.139702 |
| 1  | 3.946359  | -0.065894 | 2.251280  | 1  | 6.640389  | -1.568895 | -1.008138 |
| 1  | 2.775142  | 1.222510  | 2.008702  | 1  | 5.943103  | 0.789137  | -1.351325 |
| 1  | 3.950872  | 0.079083  | -2.245077 | 1  | 2.522726  | -2.633034 | 1.680510  |
| 1  | 2.785611  | -1.215004 | -2.004296 | 1  | 2.598148  | -3.696748 | 0.292034  |
| 1  | 2.278520  | 0.342043  | -2.678504 | 1  | 3.096666  | 1.882770  | -1.986242 |
| 1  | -0.422360 | -4.001318 | 1.671884  | 1  | 4.264096  | 2.538196  | -0.857584 |
| 1  | 0.919587  | -3.014905 | 2.259050  | 1  | -4.807732 | 0.571996  | -2.593036 |
| 1  | -0.722080 | -2.367504 | 2.290649  | 1  | -4.199104 | 2.100663  | -1.900031 |
| 1  | -0.436256 | 3.997647  | -1.675478 | 1  | -5.845232 | 1.535830  | -1.603597 |
| 1  | 0.908138  | 3.014464  | -2.262511 | 1  | -0.785364 | 1.946063  | 0.695890  |
| 1  | -0.731544 | 2.361930  | -2.291354 | 1  | -2.028937 | -0.703174 | -0.057001 |
| 1  | 0.713773  | -4.497053 | -0.815513 | 1  | 1.964043  | 3.128946  | 2.369079  |
| 1  | 1.331628  | -3.225374 | -1.877579 | 1  | 3.355109  | 2.075013  | 2.131898  |
| 1  | 2.186804  | -3.636257 | -0.383426 | 1  | 3.379973  | 3.728917  | 1.495150  |
| 1  | 2.175485  | 3.644718  | 0.377876  | 1  | 0.450535  | -3.976744 | -1.370989 |
| 1  | 0.699787  | 4.500837  | 0.810112  | 1  | -0.693272 | -2.667973 | -1.695822 |
| 1  | 1.323300  | 3.233103  | 1.873546  | 1  | 0.997614  | -2.481005 | -2.146918 |
|    |           |           |           | 1  | -1.906677 | 1.021690  | 2.689388  |
|    |           |           |           | 1  | -1.228035 | -0.570152 | 2.374471  |
|    |           |           |           | 1  | -0.191893 | 0.761878  | 2.845859  |
|    |           |           |           | 1  | -2.350505 | 0.272375  | -2.308418 |
|    |           |           |           | 1  | -1.615424 | 1.786266  | -1.787338 |
|    |           |           |           | 1  | -0.655170 | 0.326176  | -1.871941 |
|    |           |           |           | 1  | -4.340544 | 2.895965  | 0.609879  |
|    |           |           |           | 1  | -2.757031 | 2.783940  | 1.336298  |
|    |           |           |           | 1  | -2.902482 | 2.994277  | -0.399267 |



|  |   |           |           |           |
|--|---|-----------|-----------|-----------|
|  | 1 | -6.503038 | -2.230362 | -0.974701 |
|  | 1 | -6.643075 | -0.701189 | -1.806992 |
|  | 1 | -5.250976 | -1.748742 | -2.102771 |
|  | 1 | -6.884500 | -0.943352 | 1.112094  |
|  | 1 | -5.770194 | 0.282156  | 1.713299  |
|  | 1 | -6.848026 | 0.638478  | 0.350420  |
|  | 1 | -5.102719 | -2.577517 | 0.925963  |
|  | 1 | -3.694936 | -2.321124 | -0.084889 |
|  | 1 | -3.871498 | -1.451182 | 1.450177  |
|  | 1 | -0.078036 | -4.191830 | 1.297329  |
|  | 1 | -0.071235 | -2.824736 | 2.421929  |
|  | 1 | -1.356391 | -2.978026 | 1.224789  |
|  | 1 | 0.471631  | 4.083973  | -0.035162 |
|  | 1 | 2.021010  | 4.506043  | -0.761872 |
|  | 1 | 0.889943  | 3.458078  | -1.633437 |
